# Supplementary material for: Community health workers in humanitarian settings: Scoping review
Source: PubMed Central journal article supplement (PMC7719274; doi:10.7189/jogh.10.020602), 2020-12

## Appendix S1: Database search strategies

### PubMed search

|                                                                                                                                                                                                                                                                                                                                                                                                                                                                                                                                                                                                                                                                                                                                                                                                                                                                                                                                                                                                                                                                                                                                                                                                                                                                                                                                                                                                                                                                                                                                                                                                                                                                                                                                                                                                                                                                                                                                                                                                                                                                                                                                                                                                                                                                                                                                                                                                                                                                                                                                                                                                                                                                                                                                                                                                                                                                                                                                                                                                                                                                                                                                                                                                                                                                                                                                                                                                                                                                                                                                                                                                                                                                                                                                                                                                                                                                                                                                                                                                                                                                                                                                                                                                                                                                                                                                                                                                                                                                                                                                                                                                                                                                                                                                                                                                                                                                                                                                                                                                                                                                                                                                                                                                                                                                                                   |
|---------------------------------------------------------------------------------------------------------------------------------------------------------------------------------------------------------------------------------------------------------------------------------------------------------------------------------------------------------------------------------------------------------------------------------------------------------------------------------------------------------------------------------------------------------------------------------------------------------------------------------------------------------------------------------------------------------------------------------------------------------------------------------------------------------------------------------------------------------------------------------------------------------------------------------------------------------------------------------------------------------------------------------------------------------------------------------------------------------------------------------------------------------------------------------------------------------------------------------------------------------------------------------------------------------------------------------------------------------------------------------------------------------------------------------------------------------------------------------------------------------------------------------------------------------------------------------------------------------------------------------------------------------------------------------------------------------------------------------------------------------------------------------------------------------------------------------------------------------------------------------------------------------------------------------------------------------------------------------------------------------------------------------------------------------------------------------------------------------------------------------------------------------------------------------------------------------------------------------------------------------------------------------------------------------------------------------------------------------------------------------------------------------------------------------------------------------------------------------------------------------------------------------------------------------------------------------------------------------------------------------------------------------------------------------------------------------------------------------------------------------------------------------------------------------------------------------------------------------------------------------------------------------------------------------------------------------------------------------------------------------------------------------------------------------------------------------------------------------------------------------------------------------------------------------------------------------------------------------------------------------------------------------------------------------------------------------------------------------------------------------------------------------------------------------------------------------------------------------------------------------------------------------------------------------------------------------------------------------------------------------------------------------------------------------------------------------------------------------------------------------------------------------------------------------------------------------------------------------------------------------------------------------------------------------------------------------------------------------------------------------------------------------------------------------------------------------------------------------------------------------------------------------------------------------------------------------------------------------------------------------------------------------------------------------------------------------------------------------------------------------------------------------------------------------------------------------------------------------------------------------------------------------------------------------------------------------------------------------------------------------------------------------------------------------------------------------------------------------------------------------------------------------------------------------------------------------------------------------------------------------------------------------------------------------------------------------------------------------------------------------------------------------------------------------------------------------------------------------------------------------------------------------------------------------------------------------------------------------------------------------------------------------------------------|
| <b>Healthcare terms</b>                                                                                                                                                                                                                                                                                                                                                                                                                                                                                                                                                                                                                                                                                                                                                                                                                                                                                                                                                                                                                                                                                                                                                                                                                                                                                                                                                                                                                                                                                                                                                                                                                                                                                                                                                                                                                                                                                                                                                                                                                                                                                                                                                                                                                                                                                                                                                                                                                                                                                                                                                                                                                                                                                                                                                                                                                                                                                                                                                                                                                                                                                                                                                                                                                                                                                                                                                                                                                                                                                                                                                                                                                                                                                                                                                                                                                                                                                                                                                                                                                                                                                                                                                                                                                                                                                                                                                                                                                                                                                                                                                                                                                                                                                                                                                                                                                                                                                                                                                                                                                                                                                                                                                                                                                                                                           |
| ("health") OR ("healthcare") OR ("primary care") OR ("nutrition") OR ("nutritional") OR ("malnutrition") OR ("family planning") OR "Delivery of Health Care"[Mesh] OR "Primary Health Care"[Mesh] OR "Delivery of Health Care, Integrated"[Mesh] OR "Health Care Reform"[Mesh]                                                                                                                                                                                                                                                                                                                                                                                                                                                                                                                                                                                                                                                                                                                                                                                                                                                                                                                                                                                                                                                                                                                                                                                                                                                                                                                                                                                                                                                                                                                                                                                                                                                                                                                                                                                                                                                                                                                                                                                                                                                                                                                                                                                                                                                                                                                                                                                                                                                                                                                                                                                                                                                                                                                                                                                                                                                                                                                                                                                                                                                                                                                                                                                                                                                                                                                                                                                                                                                                                                                                                                                                                                                                                                                                                                                                                                                                                                                                                                                                                                                                                                                                                                                                                                                                                                                                                                                                                                                                                                                                                                                                                                                                                                                                                                                                                                                                                                                                                                                                                    |
| <b>AND Community terms</b>                                                                                                                                                                                                                                                                                                                                                                                                                                                                                                                                                                                                                                                                                                                                                                                                                                                                                                                                                                                                                                                                                                                                                                                                                                                                                                                                                                                                                                                                                                                                                                                                                                                                                                                                                                                                                                                                                                                                                                                                                                                                                                                                                                                                                                                                                                                                                                                                                                                                                                                                                                                                                                                                                                                                                                                                                                                                                                                                                                                                                                                                                                                                                                                                                                                                                                                                                                                                                                                                                                                                                                                                                                                                                                                                                                                                                                                                                                                                                                                                                                                                                                                                                                                                                                                                                                                                                                                                                                                                                                                                                                                                                                                                                                                                                                                                                                                                                                                                                                                                                                                                                                                                                                                                                                                                        |
| ("community") OR ("communities") OR ("community-based") OR ("community based") OR ("home-based") OR ("home based") OR ("village")                                                                                                                                                                                                                                                                                                                                                                                                                                                                                                                                                                                                                                                                                                                                                                                                                                                                                                                                                                                                                                                                                                                                                                                                                                                                                                                                                                                                                                                                                                                                                                                                                                                                                                                                                                                                                                                                                                                                                                                                                                                                                                                                                                                                                                                                                                                                                                                                                                                                                                                                                                                                                                                                                                                                                                                                                                                                                                                                                                                                                                                                                                                                                                                                                                                                                                                                                                                                                                                                                                                                                                                                                                                                                                                                                                                                                                                                                                                                                                                                                                                                                                                                                                                                                                                                                                                                                                                                                                                                                                                                                                                                                                                                                                                                                                                                                                                                                                                                                                                                                                                                                                                                                                 |
| OR ("Community Health Planning"[Mesh] OR "Community Health Services"[Mesh])                                                                                                                                                                                                                                                                                                                                                                                                                                                                                                                                                                                                                                                                                                                                                                                                                                                                                                                                                                                                                                                                                                                                                                                                                                                                                                                                                                                                                                                                                                                                                                                                                                                                                                                                                                                                                                                                                                                                                                                                                                                                                                                                                                                                                                                                                                                                                                                                                                                                                                                                                                                                                                                                                                                                                                                                                                                                                                                                                                                                                                                                                                                                                                                                                                                                                                                                                                                                                                                                                                                                                                                                                                                                                                                                                                                                                                                                                                                                                                                                                                                                                                                                                                                                                                                                                                                                                                                                                                                                                                                                                                                                                                                                                                                                                                                                                                                                                                                                                                                                                                                                                                                                                                                                                       |
| <b>AND Community Health Worker terms</b>                                                                                                                                                                                                                                                                                                                                                                                                                                                                                                                                                                                                                                                                                                                                                                                                                                                                                                                                                                                                                                                                                                                                                                                                                                                                                                                                                                                                                                                                                                                                                                                                                                                                                                                                                                                                                                                                                                                                                                                                                                                                                                                                                                                                                                                                                                                                                                                                                                                                                                                                                                                                                                                                                                                                                                                                                                                                                                                                                                                                                                                                                                                                                                                                                                                                                                                                                                                                                                                                                                                                                                                                                                                                                                                                                                                                                                                                                                                                                                                                                                                                                                                                                                                                                                                                                                                                                                                                                                                                                                                                                                                                                                                                                                                                                                                                                                                                                                                                                                                                                                                                                                                                                                                                                                                          |
| ("community health workers") OR ("community health worker") OR ("community-based health workers") OR ("community-based health worker") OR ("community based health workers") OR ("community based health worker") OR ("community healthcare workers") OR ("community healthcare worker") OR ("community health care workers") OR ("community health care worker") OR ("community volunteers") OR ("community volunteer") OR ("community health volunteers") OR ("community health volunteer") OR ("volunteer health workers") OR ("volunteer health worker") OR ("voluntary health workers") OR ("voluntary health worker") OR ("lay health workers") OR ("lay health worker") OR ("community relays") OR ("community relay") OR ("relais communautaires") OR ("relais communautaire") OR ("lady health workers") OR ("lady health worker") OR ("lady health visitors") OR ("lady health visitor") OR ("community based distributors") OR ("community based distributor") OR ("community-based distribution") OR ("community based distribution") OR ("community-based distributors") OR ("community-based distributor") OR ("community health distributors") OR ("community health distributor") OR ("community based agents") OR ("community based agent") OR ("community-based agents") OR ("community-based agent") OR ("health extension workers") OR ("health extension worker") OR ("community health agents") OR ("community health agent") OR ("agents de santé") OR ("agent de santé") OR ("agents de sante") OR ("agent de sante") OR ("health surveillance assistants") OR ("health surveillance assistant") OR ("community health assistants") OR ("community health assistant") OR ("community health surveyors") OR ("community health surveyor") OR ("community health promoters") OR ("community health promoter") OR ("rural health auxiliaries") OR ("rural health auxiliary") OR ("community owned resource persons") OR ("community owned resource person") OR ("community-owned resource persons") OR ("community-owned resource person") OR ("health aides") OR ("health aide") OR ("allied health personnel") OR ("voluntary workers") OR ("voluntary worker") OR ("home nursing aides") OR ("home nursing aide") OR ("peer groups") OR ("peer group") OR ("doulas") OR ("doula") OR ("barefoot doctors") OR ("barefoot doctor") OR ("backpack health workers") OR ("backpack health worker") OR ("back pack health workers") OR ("back pack health worker") OR ("backpack health care workers") OR ("backpack health care worker") OR ("back pack health care workers") OR ("back pack health care worker") OR ("backpack healthcare workers") OR ("backpack healthcare worker") OR ("back pack healthcare workers") OR ("back pack healthcare worker") OR ("brigadistas") OR ("brigadista") OR ("community networks") OR ("community network") OR ("village polio volunteers") OR ("village polio volunteer") OR ("outreach volunteers") OR ("outreach volunteer") OR ("outreach workers") OR ("outreach worker") OR ("community networks") OR ("community network") OR ("community health nurses") OR ("community health nurse") OR ("community health officers") OR ("community health officer") OR ("village health workers") OR ("village health worker") OR ("village health volunteers") OR ("village health volunteer") OR ("malaria agents") OR ("malaria agent") OR ("community mobilizers") OR ("community mobilizer") OR ("community mobilisers") OR ("community mobiliser") OR ("polio volunteers") OR ("polio volunteer") OR ("volunteer health advisors") OR ("volunteer health advisor") OR ("village-based family planning workers") OR ("village-based family planning worker") OR ("village based family planning workers") OR ("village based family planning worker") OR ("community nutrition workers") OR ("community nutrition worker") OR ("community-based nutrition workers") OR ("community-based nutrition worker") OR ("community based nutrition workers") OR ("community based nutrition worker") OR ("community nutrition volunteers") OR ("community nutrition volunteer") OR ("community-based nutrition volunteers") OR ("community-based nutrition volunteer") OR ("community based nutrition volunteers") OR ("community based nutrition volunteer") OR ("accredited social health activists") OR ("accredited social health activist") OR ("anganwadi workers") OR ("anganwadi worker") OR ("agentes comunitários de saúde") OR ("agente comunitário de saúde") OR ("agentes comunitarios de saude") OR ("agente comunitario de saude") OR ("agentes polivalentes elementares") OR ("agente polivalente elementar") OR ("agentes comunitários de salud") OR ("agente comunitário de salud") OR ("agentes comunitarios de salud") OR ("agente comunitarios de salud") OR ("activistas") OR ("activista") OR ("barangay health workers") OR ("barangay health worker") OR ("colaboradores voluntários") OR ("colaborador voluntário") OR ("community drug distributors") OR ("community drug distributor") OR ("community health representatives") OR ("community health representative") OR ("female multipurpose health workers") OR ("female multipurpose health worker") OR ("female multi-purpose health workers") OR ("female |

|                                                                                                                                                                                                                                                                                                                                                                                                                                                                                                                                                                                                                                                                                                                                                                                                                                                                                                                                                                                                                                                                                                                                                                                                                                                                                                                                                                                                                                                                                                                                                                                                                                                                                                                                                                                                                                                                                                                                                                                                                                                                                                                                                                                                                                                                                                                                                                                                                                                                                                                                                                                                                                                                                                                                                                                                                                                                                                                                                                                                                                                                                                                                                                                                                                                                                                                                                                                                                                                                                                                                                                                                                                                                                                                                                                                                                                                                                                                                                                                                                                                                                                                                                                                                                                                                                                                                                                                                                                                                                                                                                                                                                                                                                                                                                                                                                                                                                                                                                                                |
|--------------------------------------------------------------------------------------------------------------------------------------------------------------------------------------------------------------------------------------------------------------------------------------------------------------------------------------------------------------------------------------------------------------------------------------------------------------------------------------------------------------------------------------------------------------------------------------------------------------------------------------------------------------------------------------------------------------------------------------------------------------------------------------------------------------------------------------------------------------------------------------------------------------------------------------------------------------------------------------------------------------------------------------------------------------------------------------------------------------------------------------------------------------------------------------------------------------------------------------------------------------------------------------------------------------------------------------------------------------------------------------------------------------------------------------------------------------------------------------------------------------------------------------------------------------------------------------------------------------------------------------------------------------------------------------------------------------------------------------------------------------------------------------------------------------------------------------------------------------------------------------------------------------------------------------------------------------------------------------------------------------------------------------------------------------------------------------------------------------------------------------------------------------------------------------------------------------------------------------------------------------------------------------------------------------------------------------------------------------------------------------------------------------------------------------------------------------------------------------------------------------------------------------------------------------------------------------------------------------------------------------------------------------------------------------------------------------------------------------------------------------------------------------------------------------------------------------------------------------------------------------------------------------------------------------------------------------------------------------------------------------------------------------------------------------------------------------------------------------------------------------------------------------------------------------------------------------------------------------------------------------------------------------------------------------------------------------------------------------------------------------------------------------------------------------------------------------------------------------------------------------------------------------------------------------------------------------------------------------------------------------------------------------------------------------------------------------------------------------------------------------------------------------------------------------------------------------------------------------------------------------------------------------------------------------------------------------------------------------------------------------------------------------------------------------------------------------------------------------------------------------------------------------------------------------------------------------------------------------------------------------------------------------------------------------------------------------------------------------------------------------------------------------------------------------------------------------------------------------------------------------------------------------------------------------------------------------------------------------------------------------------------------------------------------------------------------------------------------------------------------------------------------------------------------------------------------------------------------------------------------------------------------------------------------------------------------------------------------|
| multi-purpose health worker") OR ("kaders") OR ("kader") OR ("promotoras") OR ("promotora") OR ("rural health motivators") OR ("rural health motivator") OR ("village drug-kit managers") OR ("village drug-kit manager") OR ("village drug kit managers") OR ("village drug kit manager") OR ("village health helpers") OR ("village health helper") OR ("traditional birth attendants") OR ("traditional birth attendant") OR ("midwives") OR ("midwife") OR ("midwifery") OR ("lay maternal health workers") OR ("lay maternal health worker")                                                                                                                                                                                                                                                                                                                                                                                                                                                                                                                                                                                                                                                                                                                                                                                                                                                                                                                                                                                                                                                                                                                                                                                                                                                                                                                                                                                                                                                                                                                                                                                                                                                                                                                                                                                                                                                                                                                                                                                                                                                                                                                                                                                                                                                                                                                                                                                                                                                                                                                                                                                                                                                                                                                                                                                                                                                                                                                                                                                                                                                                                                                                                                                                                                                                                                                                                                                                                                                                                                                                                                                                                                                                                                                                                                                                                                                                                                                                                                                                                                                                                                                                                                                                                                                                                                                                                                                                                              |
| OR "Community Health Workers"[Mesh]                                                                                                                                                                                                                                                                                                                                                                                                                                                                                                                                                                                                                                                                                                                                                                                                                                                                                                                                                                                                                                                                                                                                                                                                                                                                                                                                                                                                                                                                                                                                                                                                                                                                                                                                                                                                                                                                                                                                                                                                                                                                                                                                                                                                                                                                                                                                                                                                                                                                                                                                                                                                                                                                                                                                                                                                                                                                                                                                                                                                                                                                                                                                                                                                                                                                                                                                                                                                                                                                                                                                                                                                                                                                                                                                                                                                                                                                                                                                                                                                                                                                                                                                                                                                                                                                                                                                                                                                                                                                                                                                                                                                                                                                                                                                                                                                                                                                                                                                            |
| <b>AND Humanitarian Settings terms</b>                                                                                                                                                                                                                                                                                                                                                                                                                                                                                                                                                                                                                                                                                                                                                                                                                                                                                                                                                                                                                                                                                                                                                                                                                                                                                                                                                                                                                                                                                                                                                                                                                                                                                                                                                                                                                                                                                                                                                                                                                                                                                                                                                                                                                                                                                                                                                                                                                                                                                                                                                                                                                                                                                                                                                                                                                                                                                                                                                                                                                                                                                                                                                                                                                                                                                                                                                                                                                                                                                                                                                                                                                                                                                                                                                                                                                                                                                                                                                                                                                                                                                                                                                                                                                                                                                                                                                                                                                                                                                                                                                                                                                                                                                                                                                                                                                                                                                                                                         |
| ("emergency") OR ("emergencies") OR ("humanitarian") OR ("disaster") OR ("disasters") OR ("outbreak") OR ("outbreaks") OR ("epidemic") OR ("epidemics") OR ("crisis") OR ("crises") OR ("insecurity") OR ("war") OR ("wars") OR ("war-torn") OR ("warfare") OR ("conflict") OR ("conflicts") OR ("tsunami") OR ("tsunamis") OR ("flooding") OR ("flood") OR ("floods") OR ("cyclone") OR ("cyclones") OR ("hurricane") OR ("hurricanes") OR ("earthquake") OR ("earthquakes") OR ("drought") OR ("droughts") OR ("famine") OR ("famines") OR ("refugee") OR ("refugees") OR ("displaced") OR ("displacement")                                                                                                                                                                                                                                                                                                                                                                                                                                                                                                                                                                                                                                                                                                                                                                                                                                                                                                                                                                                                                                                                                                                                                                                                                                                                                                                                                                                                                                                                                                                                                                                                                                                                                                                                                                                                                                                                                                                                                                                                                                                                                                                                                                                                                                                                                                                                                                                                                                                                                                                                                                                                                                                                                                                                                                                                                                                                                                                                                                                                                                                                                                                                                                                                                                                                                                                                                                                                                                                                                                                                                                                                                                                                                                                                                                                                                                                                                                                                                                                                                                                                                                                                                                                                                                                                                                                                                                  |
| OR "Relief Work"[Mesh] OR "Warfare"[Mesh] OR "Emergency Medical Services"[Mesh] OR "Disease Outbreaks"[Mesh] OR "Disasters"[Mesh] OR "Starvation"[Mesh] OR "Refugees"[Mesh] OR "Geological Phenomena"[Mesh] OR "Warfare and Armed Conflicts"[Mesh]                                                                                                                                                                                                                                                                                                                                                                                                                                                                                                                                                                                                                                                                                                                                                                                                                                                                                                                                                                                                                                                                                                                                                                                                                                                                                                                                                                                                                                                                                                                                                                                                                                                                                                                                                                                                                                                                                                                                                                                                                                                                                                                                                                                                                                                                                                                                                                                                                                                                                                                                                                                                                                                                                                                                                                                                                                                                                                                                                                                                                                                                                                                                                                                                                                                                                                                                                                                                                                                                                                                                                                                                                                                                                                                                                                                                                                                                                                                                                                                                                                                                                                                                                                                                                                                                                                                                                                                                                                                                                                                                                                                                                                                                                                                             |
| <b>AND Low- and Middle-Income Country terms</b>                                                                                                                                                                                                                                                                                                                                                                                                                                                                                                                                                                                                                                                                                                                                                                                                                                                                                                                                                                                                                                                                                                                                                                                                                                                                                                                                                                                                                                                                                                                                                                                                                                                                                                                                                                                                                                                                                                                                                                                                                                                                                                                                                                                                                                                                                                                                                                                                                                                                                                                                                                                                                                                                                                                                                                                                                                                                                                                                                                                                                                                                                                                                                                                                                                                                                                                                                                                                                                                                                                                                                                                                                                                                                                                                                                                                                                                                                                                                                                                                                                                                                                                                                                                                                                                                                                                                                                                                                                                                                                                                                                                                                                                                                                                                                                                                                                                                                                                                |
| ("Afghanistan") OR ("Albania") OR ("Algeria") OR ("American Samoa") OR ("Angola") OR ("Armenia") OR ("Azerbaijan") OR ("Bangladesh") OR ("Belarus") OR ("Byelarus") OR ("Belorussia") OR ("Belize") OR ("Benin") OR ("Bhutan") OR ("Bolivia") OR ("Bosnia") OR ("Botswana") OR ("Brazil") OR ("Bulgaria") OR ("Burma") OR ("Burkina Faso") OR ("Burundi") OR ("Cabo Verde") OR ("Cape Verde") OR ("Cambodia") OR ("Cameroon") OR ("Central African Republic") OR ("Chad") OR ("China") OR ("Colombia") OR ("Comoros") OR ("Comores") OR ("Comoro") OR ("Congo") OR ("Costa Rica") OR ("Côte d'Ivoire") OR ("Cuba") OR ("Djibouti") OR ("Dominica") OR ("Dominican Republic") OR ("Ecuador") OR ("Egypt") OR ("El Salvador") OR ("Eritrea") OR ("Ethiopia") OR ("Fiji") OR ("Gabon") OR ("Gambia") OR ("Gaza") OR ("Georgia") OR ("Georgia Republic") OR ("Ghana") OR ("Grenada") OR ("Grenadines") OR ("Guatemala") OR ("Guinea") OR ("Guinea Bissau") OR ("Guyana") OR ("Haiti") OR ("Herzegovina") OR ("Hercegovina") OR ("Honduras") OR ("India") OR ("Indonesia") OR ("Iran") OR ("Iraq") OR ("Jamaica") OR ("Jordan") OR ("Kazakhstan") OR ("Kenya") OR ("Kiribati") OR ("Korea") OR ("Kosovo") OR ("Kyrgyz") OR ("Kirghizia") OR ("Kirghiz") OR ("Kyrgyzstan") OR ("Lao PDR") OR ("Laos") OR ("Lebanon") OR ("Lesotho") OR ("Liberia") OR ("Libya") OR ("Macedonia") OR ("Madagascar") OR ("Malawi") OR ("Malay") OR ("Malaya") OR ("Malaysia") OR ("Maldives") OR ("Mali") OR ("Marshall Islands") OR ("Mauritania") OR ("Mauritius") OR ("Mexico") OR ("Micronesia") OR ("Moldova") OR ("Mongolia") OR ("Montenegro") OR ("Morocco") OR ("Mozambique") OR ("Myanmar") OR ("Namibia") OR ("Nepal") OR ("Nicaragua") OR ("Niger") OR ("Nigeria") OR ("Pakistan") OR ("Palau") OR ("Panama") OR ("Papua New Guinea") OR ("Paraguay") OR ("Peru") OR ("Philippines") OR ("Principe") OR ("Romania") OR ("Rwanda") OR ("Ruanda") OR ("Samoa") OR ("Sao Tome") OR ("Senegal") OR ("Serbia") OR ("Sierra Leone") OR ("Solomon Islands") OR ("Somalia") OR ("South Africa") OR ("South Sudan") OR ("Sri Lanka") OR ("St Lucia") OR ("St Vincent") OR ("Sudan") OR ("Surinam") OR ("Suriname") OR ("Swaziland") OR ("Syria") OR ("Syrian Arab Republic") OR ("Tajikistan") OR ("Tadzhikistan") OR ("Tajikistan") OR ("Tadzhik") OR ("Tanzania") OR ("Thailand") OR ("Timor") OR ("Togo") OR ("Tonga") OR ("Tunisia") OR ("Turkey") OR ("Turkmen") OR ("Turkmenistan") OR ("Tuvalu") OR ("Uganda") OR ("Ukraine") OR ("Uzbek") OR ("Uzbekistan") OR ("Vanuatu") OR ("Vietnam") OR ("West Bank") OR ("Yemen") OR ("Zambia") OR ("Zimbabwe") OR ("Deprived Countries") OR ("Deprived Population") OR ("Deprived Populations") OR ("Developing Countries") OR ("Developing Country") OR ("Developing Economies") OR ("Developing Economy") OR ("Developing Nation") OR ("Developing Nations") OR ("Developing Population") OR ("Developing Populations") OR ("Developing World") OR ("LAMI Countries") OR ("LAMI Country") OR ("Less Developed Countries") OR ("Less Developed Country") OR ("Less Developed Economies") OR ("Less Developed Nation") OR ("Less Developed Nations") OR ("Less Developed World") OR ("Lesser Developed Countries") OR ("Lesser Developed Nations") OR ("LMIC") OR ("LMICS") OR ("Low GDP") OR ("Low GNP") OR ("Low Gross Domestic") OR ("Low Gross National") OR ("Low Income Countries") OR ("Low Income Country") OR ("Low Income Economies") OR ("Low Income Economy") OR ("Low Income Nations") OR ("Low Income Population") OR ("Low Income Populations") OR ("Lower GDP") OR ("lower gross domestic") OR ("Lower Income Countries") OR ("Lower Income Country") OR ("Lower Income Nations") OR ("Lower Income Population") OR ("Lower Income Populations") OR ("Middle Income Countries") OR ("Middle Income Country") OR ("Middle Income Economies") OR ("Middle Income Nation") OR ("Middle Income Nations") OR ("Middle Income Population") OR ("Middle Income Populations") OR ("Poor Countries") OR ("Poor Country") OR ("Poor Economies") OR ("Poor Economy") OR ("Poor Nation") OR ("Poor Nations") OR ("Poor Population") OR ("Poor Populations") OR ("poor world") OR ("Poorer Countries") OR ("Poorer Economies") OR ("Poorer Economy") OR ("Poorer Nations") OR ("Poorer Population") OR ("Poorer Populations") OR ("Third World") OR ("Transitional Countries") OR ("Transitional Country") OR ("Transitional Economies") OR ("Transitional Economy") OR ("Under Developed Countries") OR ("Under Developed Country") OR ("under developed nations") OR ("Under Developed World") OR ("Under Served Population") OR ("Under Served Populations") OR ("Underdeveloped Countries") OR ("Underdeveloped Country") OR ("underdeveloped economies") OR ("underdeveloped nations") OR ("underdeveloped population") OR ("Underdeveloped World") OR ("Underserved Countries") OR ("Underserved Nations") OR ("Underserved Population") OR |

|                                                                                                                                                                                                                                                                                                                                                                                                                                                                                                                                                                                                                                                                                                                                                                                                                                                                                                                            |
|----------------------------------------------------------------------------------------------------------------------------------------------------------------------------------------------------------------------------------------------------------------------------------------------------------------------------------------------------------------------------------------------------------------------------------------------------------------------------------------------------------------------------------------------------------------------------------------------------------------------------------------------------------------------------------------------------------------------------------------------------------------------------------------------------------------------------------------------------------------------------------------------------------------------------|
| ("Underserved Populations")                                                                                                                                                                                                                                                                                                                                                                                                                                                                                                                                                                                                                                                                                                                                                                                                                                                                                                |
| <b>NOT High Income Country terms</b>                                                                                                                                                                                                                                                                                                                                                                                                                                                                                                                                                                                                                                                                                                                                                                                                                                                                                       |
| NOT "Aruba"[Mesh] OR "Australia"[Mesh] OR "South Australia"[Mesh] OR "Western Australia"[Mesh] OR "Austria"[Mesh] OR "Bahamas"[Mesh] OR "Bahrain"[Mesh] OR "Belgium"[Mesh] OR "Bermuda"[Mesh] OR "Brunei"[Mesh] OR "Canada"[Mesh] OR "Channel Islands"[Mesh] OR "Denmark"[Mesh] OR "Finland"[Mesh] OR "France"[Mesh] OR "Germany"[Mesh] OR "Germany, West"[Mesh] OR "Germany, East"[Mesh] OR "Greenland"[Mesh] OR "Guam"[Mesh] OR "Hong Kong"[Mesh] OR "Iceland"[Mesh] OR "Ireland"[Mesh] OR "United Kingdom"[Mesh] OR "Israel"[Mesh] OR "Italy"[Mesh] OR "Japan"[Mesh] OR "Kuwait"[Mesh] OR "Luxembourg"[Mesh] OR "Netherlands"[Mesh] OR "New Zealand"[Mesh] OR "Norway"[Mesh] OR "Qatar"[Mesh] OR "Saudi Arabia"[Mesh] OR "Singapore"[Mesh] OR "Spain"[Mesh] OR "Sweden"[Mesh] OR "Switzerland"[Mesh] OR "Taiwan"[Mesh] OR "United Arab Emirates"[Mesh] OR "United States"[Mesh] OR "United States Virgin Islands"[Mesh] |

## Scopus search

|                                                                                                                                                                                                                                                                                                                                                                                                                                                                                                                                                                                                                                                                                                                                                                                                                                                                                                                                                                                                                                                                                                                                                                                                                                                                                                                                                                                                                                                                                                                                                                                                                                                                                                                                                                                                                                                                                                                                                                                                                                                                                                                                                                                                                                                                                                                                                                                                                                                                                                                                                                                                                                                                                                                                                                                                                                                                                                                                                                                                                                                                                                                                                                                                                                                                                                                                                                                                                                                                                                                                                                                                                                                                                                                                                                                                                                                                                                                                                                                                                                                                                                                                                                                                                                                                                                                                      |
|--------------------------------------------------------------------------------------------------------------------------------------------------------------------------------------------------------------------------------------------------------------------------------------------------------------------------------------------------------------------------------------------------------------------------------------------------------------------------------------------------------------------------------------------------------------------------------------------------------------------------------------------------------------------------------------------------------------------------------------------------------------------------------------------------------------------------------------------------------------------------------------------------------------------------------------------------------------------------------------------------------------------------------------------------------------------------------------------------------------------------------------------------------------------------------------------------------------------------------------------------------------------------------------------------------------------------------------------------------------------------------------------------------------------------------------------------------------------------------------------------------------------------------------------------------------------------------------------------------------------------------------------------------------------------------------------------------------------------------------------------------------------------------------------------------------------------------------------------------------------------------------------------------------------------------------------------------------------------------------------------------------------------------------------------------------------------------------------------------------------------------------------------------------------------------------------------------------------------------------------------------------------------------------------------------------------------------------------------------------------------------------------------------------------------------------------------------------------------------------------------------------------------------------------------------------------------------------------------------------------------------------------------------------------------------------------------------------------------------------------------------------------------------------------------------------------------------------------------------------------------------------------------------------------------------------------------------------------------------------------------------------------------------------------------------------------------------------------------------------------------------------------------------------------------------------------------------------------------------------------------------------------------------------------------------------------------------------------------------------------------------------------------------------------------------------------------------------------------------------------------------------------------------------------------------------------------------------------------------------------------------------------------------------------------------------------------------------------------------------------------------------------------------------------------------------------------------------------------------------------------------------------------------------------------------------------------------------------------------------------------------------------------------------------------------------------------------------------------------------------------------------------------------------------------------------------------------------------------------------------------------------------------------------------------------------------------------------|
| <b>Healthcare terms</b>                                                                                                                                                                                                                                                                                                                                                                                                                                                                                                                                                                                                                                                                                                                                                                                                                                                                                                                                                                                                                                                                                                                                                                                                                                                                                                                                                                                                                                                                                                                                                                                                                                                                                                                                                                                                                                                                                                                                                                                                                                                                                                                                                                                                                                                                                                                                                                                                                                                                                                                                                                                                                                                                                                                                                                                                                                                                                                                                                                                                                                                                                                                                                                                                                                                                                                                                                                                                                                                                                                                                                                                                                                                                                                                                                                                                                                                                                                                                                                                                                                                                                                                                                                                                                                                                                                              |
| TITLE-ABS-KEY ("health") OR ("healthcare") OR ("primary care") OR ("nutrition") OR ("nutritional") OR ("malnutrition") OR ("family planning") OR ("primary health care") OR ("primary healthcare") OR ("community health services")                                                                                                                                                                                                                                                                                                                                                                                                                                                                                                                                                                                                                                                                                                                                                                                                                                                                                                                                                                                                                                                                                                                                                                                                                                                                                                                                                                                                                                                                                                                                                                                                                                                                                                                                                                                                                                                                                                                                                                                                                                                                                                                                                                                                                                                                                                                                                                                                                                                                                                                                                                                                                                                                                                                                                                                                                                                                                                                                                                                                                                                                                                                                                                                                                                                                                                                                                                                                                                                                                                                                                                                                                                                                                                                                                                                                                                                                                                                                                                                                                                                                                                  |
| <b>AND Community terms</b>                                                                                                                                                                                                                                                                                                                                                                                                                                                                                                                                                                                                                                                                                                                                                                                                                                                                                                                                                                                                                                                                                                                                                                                                                                                                                                                                                                                                                                                                                                                                                                                                                                                                                                                                                                                                                                                                                                                                                                                                                                                                                                                                                                                                                                                                                                                                                                                                                                                                                                                                                                                                                                                                                                                                                                                                                                                                                                                                                                                                                                                                                                                                                                                                                                                                                                                                                                                                                                                                                                                                                                                                                                                                                                                                                                                                                                                                                                                                                                                                                                                                                                                                                                                                                                                                                                           |
| TITLE-ABS-KEY ("community") OR ("communities") OR ("community-based") OR ("community based") OR ("home-based") OR ("home based") OR ("village")                                                                                                                                                                                                                                                                                                                                                                                                                                                                                                                                                                                                                                                                                                                                                                                                                                                                                                                                                                                                                                                                                                                                                                                                                                                                                                                                                                                                                                                                                                                                                                                                                                                                                                                                                                                                                                                                                                                                                                                                                                                                                                                                                                                                                                                                                                                                                                                                                                                                                                                                                                                                                                                                                                                                                                                                                                                                                                                                                                                                                                                                                                                                                                                                                                                                                                                                                                                                                                                                                                                                                                                                                                                                                                                                                                                                                                                                                                                                                                                                                                                                                                                                                                                      |
| <b>AND Community Health Worker terms</b>                                                                                                                                                                                                                                                                                                                                                                                                                                                                                                                                                                                                                                                                                                                                                                                                                                                                                                                                                                                                                                                                                                                                                                                                                                                                                                                                                                                                                                                                                                                                                                                                                                                                                                                                                                                                                                                                                                                                                                                                                                                                                                                                                                                                                                                                                                                                                                                                                                                                                                                                                                                                                                                                                                                                                                                                                                                                                                                                                                                                                                                                                                                                                                                                                                                                                                                                                                                                                                                                                                                                                                                                                                                                                                                                                                                                                                                                                                                                                                                                                                                                                                                                                                                                                                                                                             |
| TITLE-ABS-KEY ("community health workers") OR ("community health worker") OR ("community-based health workers") OR ("community-based health worker") OR ("community based health workers") OR ("community based health worker") OR ("community healthcare workers") OR ("community healthcare worker") OR ("community health care workers") OR ("community health care worker") OR ("community volunteers") OR ("community volunteer") OR ("community health volunteers") OR ("community health volunteer") OR ("volunteer health workers") OR ("volunteer health worker") OR ("voluntary health workers") OR ("voluntary health worker") OR ("lay health workers") OR ("lay health worker") OR ("community relays") OR ("community relay") OR ("relais communautaires") OR ("relais communautaire") OR ("lady health workers") OR ("lady health worker") OR ("lady health visitors") OR ("lady health visitor") OR ("community based distributors") OR ("community based distributor") OR ("community-based distribution") OR ("community based distribution") OR ("community-based distributors") OR ("community-based distributor") OR ("community health distributors") OR ("community health distributor") OR ("community based agents") OR ("community based agent") OR ("community-based agents") OR ("community-based agent") OR ("health extension workers") OR ("health extension worker") OR ("community health agents") OR ("community health agent") OR ("agents de santé") OR ("agent de santé") OR ("agents de sante") OR ("agent de sante") OR ("health surveillance assistants") OR ("health surveillance assistant") OR ("community health assistants") OR ("community health assistant") OR ("community health surveyors") OR ("community health surveyor") OR ("community health promoters") OR ("community health promoter") OR ("rural health auxiliaries") OR ("rural health auxiliary") OR ("community owned resource persons") OR ("community owned resource person") OR ("community-owned resource persons") OR ("community-owned resource person") OR ("health aides") OR ("health aide") OR ("allied health personnel") OR ("voluntary workers") OR ("voluntary worker") OR ("home nursing aides") OR ("home nursing aide") OR ("peer groups") OR ("peer group") OR ("doulas") OR ("doula") OR ("barefoot doctors") OR ("barefoot doctor") OR ("backpack health workers") OR ("backpack health worker") OR ("back pack health workers") OR ("back pack health worker") OR ("backpack health care workers") OR ("backpack health care worker") OR ("back pack health care workers") OR ("back pack health care worker") OR ("backpack healthcare workers") OR ("backpack healthcare worker") OR ("back pack healthcare workers") OR ("back pack healthcare worker") OR ("brigadistas") OR ("brigadista") OR ("community networks") OR ("community network") OR ("village polio volunteers") OR ("village polio volunteer") OR ("outreach volunteers") OR ("outreach volunteer") OR ("outreach workers") OR ("outreach worker") OR ("community networks") OR ("community network") OR ("community health nurses") OR ("community health nurse") OR ("community health officers") OR ("community health officer") OR ("village health workers") OR ("village health worker") OR ("village health volunteers") OR ("village health volunteer") OR ("malaria agents") OR ("malaria agent") OR ("community mobilizers") OR ("community mobilizer") OR ("community mobilisers") OR ("community mobiliser") OR ("polio volunteers") OR ("polio volunteer") OR ("volunteer health advisors") OR ("volunteer health advisor") OR ("village-based family planning workers") OR ("village-based family planning worker") OR ("village based family planning workers") OR ("village based family planning worker") OR ("community nutrition workers") OR ("community nutrition worker") OR ("community-based nutrition workers") OR ("community-based nutrition worker") OR ("community based nutrition workers") OR ("community based nutrition worker") OR ("community nutrition volunteers") OR ("community nutrition volunteer") OR ("community-based nutrition volunteers") OR ("community-based nutrition volunteer") OR ("community based nutrition volunteers") OR ("community based nutrition volunteer") OR |

|                                                                                                                                                                                                                                                                                                                                                                                                                                                                                                                                                                                                                                                                                                                                                                                                                                                                                                                                                                                                                                                                                                                                                                                                                                                                                                                                                                                                                                                                                                                                                                                                                                                                                                                                                                                                                                                                                                                                                                                                                                                                                                                                                                                                                                                                                                                                                                                                                                                                                                                                                                                                                                                                                                                                                                                                                                                                                                                                                                                                                                                                                                                                                                                                                                                                                                                                                                                                                                                                                                                                                                                                                                                                                                                                                                                                                                                                                                                                                                                                                                                                                                                                                                                                                                                                                                                                                                                                                                                                                               |
|-----------------------------------------------------------------------------------------------------------------------------------------------------------------------------------------------------------------------------------------------------------------------------------------------------------------------------------------------------------------------------------------------------------------------------------------------------------------------------------------------------------------------------------------------------------------------------------------------------------------------------------------------------------------------------------------------------------------------------------------------------------------------------------------------------------------------------------------------------------------------------------------------------------------------------------------------------------------------------------------------------------------------------------------------------------------------------------------------------------------------------------------------------------------------------------------------------------------------------------------------------------------------------------------------------------------------------------------------------------------------------------------------------------------------------------------------------------------------------------------------------------------------------------------------------------------------------------------------------------------------------------------------------------------------------------------------------------------------------------------------------------------------------------------------------------------------------------------------------------------------------------------------------------------------------------------------------------------------------------------------------------------------------------------------------------------------------------------------------------------------------------------------------------------------------------------------------------------------------------------------------------------------------------------------------------------------------------------------------------------------------------------------------------------------------------------------------------------------------------------------------------------------------------------------------------------------------------------------------------------------------------------------------------------------------------------------------------------------------------------------------------------------------------------------------------------------------------------------------------------------------------------------------------------------------------------------------------------------------------------------------------------------------------------------------------------------------------------------------------------------------------------------------------------------------------------------------------------------------------------------------------------------------------------------------------------------------------------------------------------------------------------------------------------------------------------------------------------------------------------------------------------------------------------------------------------------------------------------------------------------------------------------------------------------------------------------------------------------------------------------------------------------------------------------------------------------------------------------------------------------------------------------------------------------------------------------------------------------------------------------------------------------------------------------------------------------------------------------------------------------------------------------------------------------------------------------------------------------------------------------------------------------------------------------------------------------------------------------------------------------------------------------------------------------------------------------------------------------------------------------|
| <p>("accredited social health activists") OR ("accredited social health activist") OR ("anganwadi workers") OR ("anganwadi worker") OR ("agentes comunitários de saúde") OR ("agente comunitário de saúde") OR ("agentes comunitarios de saude") OR ("agente comunitario de saude") OR ("agentes polivalentes elementares") OR ("agente polivalente elementar") OR ("agentes comunitários de salud") OR ("agente comunitário de salud") OR ("agentes comunitarios de salud") OR ("activistas") OR ("activista") OR ("barangay health workers") OR ("barangay health worker") OR ("colaboradores voluntários") OR ("colaborador voluntário") OR ("community drug distributors") OR ("community drug distributor") OR ("community health representatives") OR ("community health representative") OR ("female multipurpose health workers") OR ("female multipurpose health worker") OR ("female multi-purpose health workers") OR ("female multi-purpose health worker") OR ("kaders") OR ("kader") OR ("promotoras") OR ("promotora") OR ("rural health motivators") OR ("rural health motivator") OR ("village drug-kit managers") OR ("village drug-kit manager") OR ("village drug kit managers") OR ("village drug kit manager") OR ("village health helpers") OR ("village health helper") OR ("traditional birth attendants") OR ("traditional birth attendant") OR ("midwives") OR ("midwife") OR ("midwifery") OR ("lay maternal health workers") OR ("lay maternal health worker")</p>                                                                                                                                                                                                                                                                                                                                                                                                                                                                                                                                                                                                                                                                                                                                                                                                                                                                                                                                                                                                                                                                                                                                                                                                                                                                                                                                                                                                                                                                                                                                                                                                                                                                                                                                                                                                                                                                                                                                                                                                                                                                                                                                                                                                                                                                                                                                                                                                                                                                                                                                                                                                                                                                                                                                                                                                                                                                                                                                                                                               |
| <p><b>AND Humanitarian Settings terms</b></p>                                                                                                                                                                                                                                                                                                                                                                                                                                                                                                                                                                                                                                                                                                                                                                                                                                                                                                                                                                                                                                                                                                                                                                                                                                                                                                                                                                                                                                                                                                                                                                                                                                                                                                                                                                                                                                                                                                                                                                                                                                                                                                                                                                                                                                                                                                                                                                                                                                                                                                                                                                                                                                                                                                                                                                                                                                                                                                                                                                                                                                                                                                                                                                                                                                                                                                                                                                                                                                                                                                                                                                                                                                                                                                                                                                                                                                                                                                                                                                                                                                                                                                                                                                                                                                                                                                                                                                                                                                                 |
| <p>TITLE-ABS-KEY ("emergency") OR ("emergencies") OR ("humanitarian") OR ("disaster") OR ("disasters") OR ("outbreak") OR ("outbreaks") OR ("epidemic") OR ("epidemics") OR ("crisis") OR ("crises") OR ("insecurity") OR ("war") OR ("wars") OR ("war-torn") OR ("warfare") OR ("conflict") OR ("conflicts") OR ("tsunami") OR ("tsunamis") OR ("flooding") OR ("flood") OR ("floods") OR ("cyclone") OR ("cyclones") OR ("hurricane") OR ("hurricanes") OR ("earthquake") OR ("earthquakes") OR ("drought") OR ("droughts") OR ("famine") OR ("famines") OR ("refugee") OR ("refugees") OR ("displaced") OR ("displacement") OR ("armed conflict")</p>                                                                                                                                                                                                                                                                                                                                                                                                                                                                                                                                                                                                                                                                                                                                                                                                                                                                                                                                                                                                                                                                                                                                                                                                                                                                                                                                                                                                                                                                                                                                                                                                                                                                                                                                                                                                                                                                                                                                                                                                                                                                                                                                                                                                                                                                                                                                                                                                                                                                                                                                                                                                                                                                                                                                                                                                                                                                                                                                                                                                                                                                                                                                                                                                                                                                                                                                                                                                                                                                                                                                                                                                                                                                                                                                                                                                                                      |
| <p><b>AND Low- and Middle-Income Country terms</b></p>                                                                                                                                                                                                                                                                                                                                                                                                                                                                                                                                                                                                                                                                                                                                                                                                                                                                                                                                                                                                                                                                                                                                                                                                                                                                                                                                                                                                                                                                                                                                                                                                                                                                                                                                                                                                                                                                                                                                                                                                                                                                                                                                                                                                                                                                                                                                                                                                                                                                                                                                                                                                                                                                                                                                                                                                                                                                                                                                                                                                                                                                                                                                                                                                                                                                                                                                                                                                                                                                                                                                                                                                                                                                                                                                                                                                                                                                                                                                                                                                                                                                                                                                                                                                                                                                                                                                                                                                                                        |
| <p>TITLE-ABS-KEY ("Afghanistan") OR ("Albania") OR ("Algeria") OR ("American Samoa") OR ("Angola") OR ("Armenia") OR ("Azerbaijan") OR ("Bangladesh") OR ("Belarus") OR ("Byelarus") OR ("Belorussia") OR ("Belize") OR ("Benin") OR ("Bhutan") OR ("Bolivia") OR ("Bosnia") OR ("Botswana") OR ("Brazil") OR ("Bulgaria") OR ("Burma") OR ("Burkina Faso") OR ("Burundi") OR ("Cabo Verde") OR ("Cape Verde") OR ("Cambodia") OR ("Cameroon") OR ("Central African Republic") OR ("Chad") OR ("China") OR ("Colombia") OR ("Comoros") OR ("Comores") OR ("Comoro") OR ("Congo") OR ("Costa Rica") OR ("Côte d'Ivoire") OR ("Cuba") OR ("Djibouti") OR ("Dominica") OR ("Dominican Republic") OR ("Ecuador") OR ("Egypt") OR ("El Salvador") OR ("Eritrea") OR ("Ethiopia") OR ("Fiji") OR ("Gabon") OR ("Gambia") OR ("Gaza") OR ("Georgia") OR ("Georgia Republic") OR ("Ghana") OR ("Grenada") OR ("Grenadines") OR ("Guatemala") OR ("Guinea") OR ("Guinea Bissau") OR ("Guyana") OR ("Haiti") OR ("Herzegovina") OR ("Hercegovina") OR ("Honduras") OR ("India") OR ("Indonesia") OR ("Iran") OR ("Iraq") OR ("Jamaica") OR ("Jordan") OR ("Kazakhstan") OR ("Kenya") OR ("Kiribati") OR ("Korea") OR ("Kosovo") OR ("Kyrgyz") OR ("Kirghizia") OR ("Kirghiz") OR ("Kyrgyzstan") OR ("Lao PDR") OR ("Laos") OR ("Lebanon") OR ("Lesotho") OR ("Liberia") OR ("Libya") OR ("Macedonia") OR ("Madagascar") OR ("Malawi") OR ("Malay") OR ("Malaya") OR ("Malaysia") OR ("Maldives") OR ("Mali") OR ("Marshall Islands") OR ("Mauritania") OR ("Mauritius") OR ("Mexico") OR ("Micronesia") OR ("Moldova") OR ("Mongolia") OR ("Montenegro") OR ("Morocco") OR ("Mozambique") OR ("Myanmar") OR ("Namibia") OR ("Nepal") OR ("Nicaragua") OR ("Niger") OR ("Nigeria") OR ("Pakistan") OR ("Palau") OR ("Panama") OR ("Papua New Guinea") OR ("Paraguay") OR ("Peru") OR ("Philippines") OR ("Principe") OR ("Romania") OR ("Rwanda") OR ("Ruanda") OR ("Samoa") OR ("Sao Tome") OR ("Senegal") OR ("Serbia") OR ("Sierra Leone") OR ("Solomon Islands") OR ("Somalia") OR ("South Africa") OR ("South Sudan") OR ("Sri Lanka") OR ("St Lucia") OR ("St Vincent") OR ("Sudan") OR ("Surinam") OR ("Suriname") OR ("Swaziland") OR ("Syria") OR ("Syrian Arab Republic") OR ("Tajikistan") OR ("Tadzhikistan") OR ("Tajikistan") OR ("Tadzhik") OR ("Tanzania") OR ("Thailand") OR ("Timor") OR ("Togo") OR ("Tonga") OR ("Tunisia") OR ("Turkey") OR ("Turkmen") OR ("Turkmenistan") OR ("Tuvalu") OR ("Uganda") OR ("Ukraine") OR ("Uzbek") OR ("Uzbekistan") OR ("Vanuatu") OR ("Vietnam") OR ("West Bank") OR ("Yemen") OR ("Zambia") OR ("Zimbabwe") OR ("Deprived Countries") OR ("Deprived Population") OR ("Deprived Populations") OR ("Developing Countries") OR ("Developing Country") OR ("Developing Economies") OR ("Developing Economy") OR ("Developing Nation") OR ("Developing Nations") OR ("Developing Population") OR ("Developing Populations") OR ("Developing World") OR ("LAMI Countries") OR ("LAMI Country") OR ("Less Developed Countries") OR ("Less Developed Country") OR ("Less Developed Economies") OR ("Less Developed Nation") OR ("Less Developed Nations") OR ("Less Developed World") OR ("Lesser Developed Countries") OR ("Lesser Developed Nations") OR ("LMIC") OR ("LMICS") OR ("Low GDP") OR ("Low GNP") OR ("Low Gross Domestic") OR ("Low Gross National") OR ("Low Income Countries") OR ("Low Income Country") OR ("Low Income Economies") OR ("Low Income Economy") OR ("Low Income Nations") OR ("Low Income Population") OR ("Low Income Populations") OR ("Lower GDP") OR ("lower gross domestic") OR ("Lower Income Countries") OR ("Lower Income Country") OR ("Lower Income Nations") OR ("Lower Income Population") OR ("Lower Income Populations") OR ("Middle Income Countries") OR ("Middle Income Country") OR ("Middle Income Economies") OR ("Middle Income Nation") OR ("Middle Income Nations") OR ("Middle Income Population") OR ("Middle Income Populations") OR ("Poor Countries") OR ("Poor Country") OR ("Poor Economies") OR ("Poor Economy") OR ("Poor Nation") OR ("Poor Nations") OR ("Poor Population") OR ("Poor Populations") OR ("poor world") OR ("Poorer Countries") OR ("Poorer Economies") OR ("Poorer Economy") OR ("Poorer Nations") OR ("Poorer Population") OR ("Poorer Populations") OR ("Third World") OR ("Transitional Countries") OR ("Transitional Country") OR ("Transitional Economies") OR</p> |

|                                                                                                                                                                                                                                                                                                                                                                                                                                                                                                                                                                                                                                                                                                                                                                     |
|---------------------------------------------------------------------------------------------------------------------------------------------------------------------------------------------------------------------------------------------------------------------------------------------------------------------------------------------------------------------------------------------------------------------------------------------------------------------------------------------------------------------------------------------------------------------------------------------------------------------------------------------------------------------------------------------------------------------------------------------------------------------|
| <p>("Transitional Economy") OR ("Under Developed Countries") OR ("Under Developed Country") OR ("under developed nations") OR ("Under Developed World") OR ("Under Served Population") OR ("Under Served Populations") OR ("Underdeveloped Countries") OR ("Underdeveloped Country") OR ("underdeveloped economies") OR ("underdeveloped nations") OR ("underdeveloped population") OR ("Underdeveloped World") OR ("Underserved Countries") OR ("Underserved Nations") OR ("Underserved Population") OR ("Underserved Populations")</p>                                                                                                                                                                                                                            |
| <p><b>NOT High Income Country terms</b></p>                                                                                                                                                                                                                                                                                                                                                                                                                                                                                                                                                                                                                                                                                                                         |
| <p>TITLE-ABS-KEY ("Aruba") OR ("Australia") OR ("South Australia") OR ("Western Australia") OR ("Austria") OR ("Bahamas") OR ("Bahrain") OR ("Belgium") OR ("Bermuda") OR ("Brunei") OR ("Canada") OR ("Channel Islands") OR ("Denmark") OR ("Finland") OR ("France") OR ("Germany") OR ("Germany, West") OR ("Germany, East") OR ("Greenland") OR ("Guam") OR ("Hong Kong") OR ("Iceland") OR ("Ireland") OR ("United Kingdom") OR ("Israel") OR ("Italy") OR ("Japan") OR ("Kuwait") OR ("Luxembourg") OR ("Netherlands") OR ("New Zealand") OR ("Norway") OR ("Qatar") OR ("Saudi Arabia") OR ("Singapore") OR ("Spain") OR ("Sweden") OR ("Switzerland") OR ("Taiwan") OR ("United Arab Emirates") OR ("United States") OR ("United States Virgin Islands")</p> |

## Web of Science search

|                                                                                                                                                                                                                                                                                                                                                                                                                                                                                                                                                                                                                                                                                                                                                                                                                                                                                                                                                                                                                                                                                                                                                                                                                                                                                                                                                                                                                                                                                                                                                                                                                                                                                                                                                                                                                                                                                                                                                                                                                                                                                                                                                                                                                                                                                                                                                                                                                                                                                                                                                                                                                                                                                                                                                                                                                                                                                                                                                                                                                                                                                                                                                                                                                                                                                                                                                                                                                                                                                                                                                                                                                                                                                                                                                                    |
|--------------------------------------------------------------------------------------------------------------------------------------------------------------------------------------------------------------------------------------------------------------------------------------------------------------------------------------------------------------------------------------------------------------------------------------------------------------------------------------------------------------------------------------------------------------------------------------------------------------------------------------------------------------------------------------------------------------------------------------------------------------------------------------------------------------------------------------------------------------------------------------------------------------------------------------------------------------------------------------------------------------------------------------------------------------------------------------------------------------------------------------------------------------------------------------------------------------------------------------------------------------------------------------------------------------------------------------------------------------------------------------------------------------------------------------------------------------------------------------------------------------------------------------------------------------------------------------------------------------------------------------------------------------------------------------------------------------------------------------------------------------------------------------------------------------------------------------------------------------------------------------------------------------------------------------------------------------------------------------------------------------------------------------------------------------------------------------------------------------------------------------------------------------------------------------------------------------------------------------------------------------------------------------------------------------------------------------------------------------------------------------------------------------------------------------------------------------------------------------------------------------------------------------------------------------------------------------------------------------------------------------------------------------------------------------------------------------------------------------------------------------------------------------------------------------------------------------------------------------------------------------------------------------------------------------------------------------------------------------------------------------------------------------------------------------------------------------------------------------------------------------------------------------------------------------------------------------------------------------------------------------------------------------------------------------------------------------------------------------------------------------------------------------------------------------------------------------------------------------------------------------------------------------------------------------------------------------------------------------------------------------------------------------------------------------------------------------------------------------------------------------------|
| <p><b>Healthcare terms</b></p>                                                                                                                                                                                                                                                                                                                                                                                                                                                                                                                                                                                                                                                                                                                                                                                                                                                                                                                                                                                                                                                                                                                                                                                                                                                                                                                                                                                                                                                                                                                                                                                                                                                                                                                                                                                                                                                                                                                                                                                                                                                                                                                                                                                                                                                                                                                                                                                                                                                                                                                                                                                                                                                                                                                                                                                                                                                                                                                                                                                                                                                                                                                                                                                                                                                                                                                                                                                                                                                                                                                                                                                                                                                                                                                                     |
| <p>TI=("health" OR "healthcare" OR "primary care" OR "nutrition" OR "nutritional" OR "malnutrition" OR "family planning" OR "primary health care" OR "primary healthcare" OR "community health services")</p>                                                                                                                                                                                                                                                                                                                                                                                                                                                                                                                                                                                                                                                                                                                                                                                                                                                                                                                                                                                                                                                                                                                                                                                                                                                                                                                                                                                                                                                                                                                                                                                                                                                                                                                                                                                                                                                                                                                                                                                                                                                                                                                                                                                                                                                                                                                                                                                                                                                                                                                                                                                                                                                                                                                                                                                                                                                                                                                                                                                                                                                                                                                                                                                                                                                                                                                                                                                                                                                                                                                                                      |
| <p>TS=("health" OR "healthcare" OR "primary care" OR "nutrition" OR "nutritional" OR "malnutrition" OR "family planning" OR "primary health care" OR "primary healthcare" OR "community health services")</p>                                                                                                                                                                                                                                                                                                                                                                                                                                                                                                                                                                                                                                                                                                                                                                                                                                                                                                                                                                                                                                                                                                                                                                                                                                                                                                                                                                                                                                                                                                                                                                                                                                                                                                                                                                                                                                                                                                                                                                                                                                                                                                                                                                                                                                                                                                                                                                                                                                                                                                                                                                                                                                                                                                                                                                                                                                                                                                                                                                                                                                                                                                                                                                                                                                                                                                                                                                                                                                                                                                                                                      |
| <p><b>AND Community terms</b></p>                                                                                                                                                                                                                                                                                                                                                                                                                                                                                                                                                                                                                                                                                                                                                                                                                                                                                                                                                                                                                                                                                                                                                                                                                                                                                                                                                                                                                                                                                                                                                                                                                                                                                                                                                                                                                                                                                                                                                                                                                                                                                                                                                                                                                                                                                                                                                                                                                                                                                                                                                                                                                                                                                                                                                                                                                                                                                                                                                                                                                                                                                                                                                                                                                                                                                                                                                                                                                                                                                                                                                                                                                                                                                                                                  |
| <p>TI=("community" OR "communities" OR "community-based" OR "community based" OR "home-based" OR "home based" OR "village")</p>                                                                                                                                                                                                                                                                                                                                                                                                                                                                                                                                                                                                                                                                                                                                                                                                                                                                                                                                                                                                                                                                                                                                                                                                                                                                                                                                                                                                                                                                                                                                                                                                                                                                                                                                                                                                                                                                                                                                                                                                                                                                                                                                                                                                                                                                                                                                                                                                                                                                                                                                                                                                                                                                                                                                                                                                                                                                                                                                                                                                                                                                                                                                                                                                                                                                                                                                                                                                                                                                                                                                                                                                                                    |
| <p>TS=("community" OR "communities" OR "community-based" OR "community based" OR "home-based" OR "home based" OR "village")</p>                                                                                                                                                                                                                                                                                                                                                                                                                                                                                                                                                                                                                                                                                                                                                                                                                                                                                                                                                                                                                                                                                                                                                                                                                                                                                                                                                                                                                                                                                                                                                                                                                                                                                                                                                                                                                                                                                                                                                                                                                                                                                                                                                                                                                                                                                                                                                                                                                                                                                                                                                                                                                                                                                                                                                                                                                                                                                                                                                                                                                                                                                                                                                                                                                                                                                                                                                                                                                                                                                                                                                                                                                                    |
| <p><b>AND Community Health Worker terms</b></p>                                                                                                                                                                                                                                                                                                                                                                                                                                                                                                                                                                                                                                                                                                                                                                                                                                                                                                                                                                                                                                                                                                                                                                                                                                                                                                                                                                                                                                                                                                                                                                                                                                                                                                                                                                                                                                                                                                                                                                                                                                                                                                                                                                                                                                                                                                                                                                                                                                                                                                                                                                                                                                                                                                                                                                                                                                                                                                                                                                                                                                                                                                                                                                                                                                                                                                                                                                                                                                                                                                                                                                                                                                                                                                                    |
| <p>TI=("community health workers" OR "community health worker" OR "community-based health workers" OR "community-based health worker" OR "community based health workers" OR "community based health worker" OR "community healthcare workers" OR "community healthcare worker" OR "community health care workers" OR "community health care worker" OR "community volunteers" OR "community volunteer" OR "community health volunteers" OR "community health volunteer" OR "volunteer health workers" OR "volunteer health worker" OR "voluntary health workers" OR "voluntary health worker" OR "lay health workers" OR "lay health worker" OR "community relays" OR "community relay" OR "relais communautaires" OR "relais communautaire" OR "lady health workers" OR "lady health worker" OR "lady health visitors" OR "lady health visitor" OR "community based distributors" OR "community based distributor" OR "community-based distribution" OR "community based distribution" OR "community-based distributors" OR "community-based distributor" OR "community health distributors" OR "community health distributor" OR "community based agents" OR "community based agent" OR "community-based agents" OR "community-based agent" OR "health extension workers" OR "health extension worker" OR "community health agents" OR "community health agent" OR "agents de santé" OR "agent de santé" OR "agents de sante" OR "agent de sante" OR "health surveillance assistants" OR "health surveillance assistant" OR "community health assistants" OR "community health assistant" OR "community health surveyors" OR "community health surveyor" OR "community health promoters" OR "community health promoter" OR "rural health auxiliaries" OR "rural health auxiliary" OR "community owned resource persons" OR "community owned resource person" OR "community-owned resource persons" OR "community-owned resource person" OR "health aides" OR "health aide" OR "allied health personnel" OR "voluntary workers" OR "voluntary worker" OR "home nursing aides" OR "home nursing aide" OR "peer groups" OR "peer group" OR "doulas" OR "doula" OR "barefoot doctors" OR "barefoot doctor" OR "backpack health workers" OR "backpack health worker" OR "back pack health workers" OR "back pack health worker" OR "backpack health care workers" OR "backpack health care worker" OR "back pack health care workers" OR "back pack health care worker" OR "backpack healthcare workers" OR "backpack healthcare worker" OR "back pack healthcare workers" OR "back pack healthcare worker" OR "brigadistas" OR "brigadista" OR "community networks" OR "community network" OR "village polio volunteers" OR "village polio volunteer" OR "outreach volunteers" OR "outreach volunteer" OR "outreach workers" OR "outreach worker" OR "community networks" OR "community network" OR "community health nurses" OR "community health nurse" OR "community health officers" OR "community health officer" OR "village health workers" OR "village health worker" OR "village health volunteers" OR "village health volunteer" OR "malaria agents" OR "malaria agent" OR "community mobilizers" OR "community mobilizer" OR "community mobilisers" OR "community mobiliser" OR "polio volunteers" OR "polio volunteer" OR "volunteer health advisors" OR "volunteer health advisor" OR "village-based family planning workers" OR "village-based family planning worker" OR "village based family planning workers" OR "village based family planning worker" OR "community nutrition workers" OR "community nutrition worker" OR "community-based nutrition workers" OR "community-based nutrition worker" OR "community based nutrition workers")</p> |

OR "community based nutrition worker" OR "community nutrition volunteers" OR "community nutrition volunteer" OR "community-based nutrition volunteers" OR "community-based nutrition volunteer" OR "community based nutrition volunteers" OR "community based nutrition volunteer" OR "accredited social health activists" OR "accredited social health activist" OR "anganwadi workers" OR "anganwadi worker" OR "agentes comunitários de saúde" OR "agente comunitário de saúde" OR "agentes comunitarios de saude" OR "agente comunitario de saude" OR "agentes polivalentes elementares" OR "agente polivalente elementar" OR "agentes comunitários de salud" OR "agente comunitário de salud" OR "agentes comunitarios de salud" OR "agente comunitarios de salud" OR "activistas" OR "activista" OR "barangay health workers" OR "barangay health worker" OR "colaboradores voluntários" OR "colaborador voluntário" OR "community drug distributors" OR "community drug distributor" OR "community health representatives" OR "community health representative" OR "female multipurpose health workers" OR "female multipurpose health worker" OR "female multi-purpose health workers" OR "female multi-purpose health worker" OR "kaders" OR "kader" OR "promotoras" OR "promotora" OR "rural health motivators" OR "rural health motivator" OR "village drug-kit managers" OR "village drug-kit manager" OR "village drug kit managers" OR "village drug kit manager" OR "village health helpers" OR "village health helper" OR "traditional birth attendants" OR "traditional birth attendant" OR "midwives" OR "midwife" OR "midwifery" OR "lay maternal health workers" OR "lay maternal health worker")

TS=("community health workers" OR "community health worker" OR "community-based health workers" OR "community-based health worker" OR "community based health workers" OR "community based health worker" OR "community healthcare workers" OR "community healthcare worker" OR "community health care workers" OR "community health care worker" OR "community volunteers" OR "community volunteer" OR "community health volunteers" OR "community health volunteer" OR "volunteer health workers" OR "volunteer health worker" OR "voluntary health workers" OR "voluntary health worker" OR "lay health workers" OR "lay health worker" OR "community relays" OR "community relay" OR "relais communautaires" OR "relais communautaire" OR "lady health workers" OR "lady health worker" OR "lady health visitors" OR "lady health visitor" OR "community based distributors" OR "community based distributor" OR "community-based distribution" OR "community based distribution" OR "community-based distributors" OR "community-based distributor" OR "community health distributors" OR "community health distributor" OR "community based agents" OR "community based agent" OR "community-based agents" OR "community-based agent" OR "health extension workers" OR "health extension worker" OR "community health agents" OR "community health agent" OR "agents de santé" OR "agent de santé" OR "agents de sante" OR "agent de sante" OR "health surveillance assistants" OR "health surveillance assistant" OR "community health assistants" OR "community health assistant" OR "community health surveyors" OR "community health surveyor" OR "community health promoters" OR "community health promoter" OR "rural health auxiliaries" OR "rural health auxiliary" OR "community owned resource persons" OR "community owned resource person" OR "community-owned resource persons" OR "community-owned resource person" OR "health aides" OR "health aide" OR "allied health personnel" OR "voluntary workers" OR "voluntary worker" OR "home nursing aides" OR "home nursing aide" OR "peer groups" OR "peer group" OR "doulas" OR "doula" OR "barefoot doctors" OR "barefoot doctor" OR "backpack health workers" OR "backpack health worker" OR "back pack health workers" OR "back pack health worker" OR "backpack health care workers" OR "backpack health care worker" OR "back pack health care workers" OR "back pack health care worker" OR "backpack healthcare workers" OR "backpack healthcare worker" OR "back pack healthcare workers" OR "back pack healthcare worker" OR "brigadistas" OR "brigadista" OR "community networks" OR "community network" OR "village polio volunteers" OR "village polio volunteer" OR "outreach volunteers" OR "outreach volunteer" OR "outreach workers" OR "outreach worker" OR "community networks" OR "community network" OR "community health nurses" OR "community health nurse" OR "community health officers" OR "community health officer" OR "village health workers" OR "village health worker" OR "village health volunteers" OR "village health volunteer" OR "malaria agents" OR "malaria agent" OR "community mobilizers" OR "community mobilizer" OR "community mobilisers" OR "community mobiliser" OR "polio volunteers" OR "polio volunteer" OR "volunteer health advisors" OR "volunteer health advisor" OR "village-based family planning workers" OR "village-based family planning worker" OR "village based family planning workers" OR "village based family planning worker" OR "community nutrition workers" OR "community nutrition worker" OR "community-based nutrition workers" OR "community-based nutrition worker" OR "community based nutrition workers" OR "community based nutrition worker" OR "community nutrition volunteers" OR "community nutrition volunteer" OR "community-based nutrition volunteers" OR "community-based nutrition volunteer" OR "community based nutrition volunteers" OR "community based nutrition volunteer" OR "accredited social health activists" OR "accredited social health activist" OR "anganwadi workers" OR "anganwadi worker" OR "agentes comunitários de saúde" OR "agente comunitário de saúde" OR "agentes comunitarios de saude" OR "agente comunitario de saude" OR "agentes polivalentes elementares" OR "agente polivalente elementar" OR "agentes comunitários de salud" OR "agente comunitário de salud" OR "agentes comunitarios de salud" OR "agente comunitarios de salud" OR "activistas" OR "activista" OR "barangay health workers" OR "barangay health worker" OR "colaboradores voluntários" OR "colaborador voluntário" OR "community drug distributors" OR "community drug distributor" OR "community health representatives" OR "community health representative" OR "female multipurpose health workers" OR "female multipurpose health worker" OR "female multi-purpose health workers" OR "female multi-purpose health worker" OR "kaders" OR "kader" OR "promotoras" OR "promotora" OR "rural health motivators" OR "rural health motivator" OR "village drug-kit managers" OR "village drug-kit manager" OR "village drug kit managers" OR

|                                                                                                                                                                                                                                                                                                                                                                                                                                                                                                                                                                                                                                                                                                                                                                                                                                                                                                                                                                                                                                                                                                                                                                                                                                                                                                                                                                                                                                                                                                                                                                                                                                                                                                                                                                                                                                                                                                                                                                                                                                                                                                                                                                                                                                                                                                                                                                                                                                                                                                                                                                                                                                                                                                                                                                                                                                                                                                                                                                                                                                                                                                                                                                                                                                                                                                                                                                                                                                                                                                                                                                                                                                                                                                                                                                                                                                                                                                                                                                                                                                                                                                                                                                                                                                                                                                                                                                                                                                                                                                      |
|------------------------------------------------------------------------------------------------------------------------------------------------------------------------------------------------------------------------------------------------------------------------------------------------------------------------------------------------------------------------------------------------------------------------------------------------------------------------------------------------------------------------------------------------------------------------------------------------------------------------------------------------------------------------------------------------------------------------------------------------------------------------------------------------------------------------------------------------------------------------------------------------------------------------------------------------------------------------------------------------------------------------------------------------------------------------------------------------------------------------------------------------------------------------------------------------------------------------------------------------------------------------------------------------------------------------------------------------------------------------------------------------------------------------------------------------------------------------------------------------------------------------------------------------------------------------------------------------------------------------------------------------------------------------------------------------------------------------------------------------------------------------------------------------------------------------------------------------------------------------------------------------------------------------------------------------------------------------------------------------------------------------------------------------------------------------------------------------------------------------------------------------------------------------------------------------------------------------------------------------------------------------------------------------------------------------------------------------------------------------------------------------------------------------------------------------------------------------------------------------------------------------------------------------------------------------------------------------------------------------------------------------------------------------------------------------------------------------------------------------------------------------------------------------------------------------------------------------------------------------------------------------------------------------------------------------------------------------------------------------------------------------------------------------------------------------------------------------------------------------------------------------------------------------------------------------------------------------------------------------------------------------------------------------------------------------------------------------------------------------------------------------------------------------------------------------------------------------------------------------------------------------------------------------------------------------------------------------------------------------------------------------------------------------------------------------------------------------------------------------------------------------------------------------------------------------------------------------------------------------------------------------------------------------------------------------------------------------------------------------------------------------------------------------------------------------------------------------------------------------------------------------------------------------------------------------------------------------------------------------------------------------------------------------------------------------------------------------------------------------------------------------------------------------------------------------------------------------------------------------------|
| "village drug kit manager" OR "village health helpers" OR "village health helper" OR "traditional birth attendants" OR "traditional birth attendant" OR "midwives" OR "midwife" OR "midwifery" OR "lay maternal health workers" OR "lay maternal health worker")                                                                                                                                                                                                                                                                                                                                                                                                                                                                                                                                                                                                                                                                                                                                                                                                                                                                                                                                                                                                                                                                                                                                                                                                                                                                                                                                                                                                                                                                                                                                                                                                                                                                                                                                                                                                                                                                                                                                                                                                                                                                                                                                                                                                                                                                                                                                                                                                                                                                                                                                                                                                                                                                                                                                                                                                                                                                                                                                                                                                                                                                                                                                                                                                                                                                                                                                                                                                                                                                                                                                                                                                                                                                                                                                                                                                                                                                                                                                                                                                                                                                                                                                                                                                                                     |
| <b>AND Humanitarian Settings terms</b>                                                                                                                                                                                                                                                                                                                                                                                                                                                                                                                                                                                                                                                                                                                                                                                                                                                                                                                                                                                                                                                                                                                                                                                                                                                                                                                                                                                                                                                                                                                                                                                                                                                                                                                                                                                                                                                                                                                                                                                                                                                                                                                                                                                                                                                                                                                                                                                                                                                                                                                                                                                                                                                                                                                                                                                                                                                                                                                                                                                                                                                                                                                                                                                                                                                                                                                                                                                                                                                                                                                                                                                                                                                                                                                                                                                                                                                                                                                                                                                                                                                                                                                                                                                                                                                                                                                                                                                                                                                               |
| TI=("emergency" OR "emergencies" OR "humanitarian" OR "disaster" OR "disasters" OR "outbreak" OR "outbreaks" OR "epidemic" OR "epidemics" OR "crisis" OR "crises" OR "insecurity" OR "war" OR "wars" OR "war-torn" OR "warfare" OR "conflict" OR "conflicts" OR "tsunami" OR "tsunamis" OR "flooding" OR "flood" OR "floods" OR "cyclone" OR "cyclones" OR "hurricane" OR "hurricanes" OR "earthquake" OR "earthquakes" OR "drought" OR "droughts" OR "famine" OR "famines" OR "refugee" OR "refugees" OR "displaced" OR "displacement" OR "armed conflict")                                                                                                                                                                                                                                                                                                                                                                                                                                                                                                                                                                                                                                                                                                                                                                                                                                                                                                                                                                                                                                                                                                                                                                                                                                                                                                                                                                                                                                                                                                                                                                                                                                                                                                                                                                                                                                                                                                                                                                                                                                                                                                                                                                                                                                                                                                                                                                                                                                                                                                                                                                                                                                                                                                                                                                                                                                                                                                                                                                                                                                                                                                                                                                                                                                                                                                                                                                                                                                                                                                                                                                                                                                                                                                                                                                                                                                                                                                                                         |
| TS=("emergency" OR "emergencies" OR "humanitarian" OR "disaster" OR "disasters" OR "outbreak" OR "outbreaks" OR "epidemic" OR "epidemics" OR "crisis" OR "crises" OR "insecurity" OR "war" OR "wars" OR "war-torn" OR "warfare" OR "conflict" OR "conflicts" OR "tsunami" OR "tsunamis" OR "flooding" OR "flood" OR "floods" OR "cyclone" OR "cyclones" OR "hurricane" OR "hurricanes" OR "earthquake" OR "earthquakes" OR "drought" OR "droughts" OR "famine" OR "famines" OR "refugee" OR "refugees" OR "displaced" OR "displacement" OR "armed conflict")                                                                                                                                                                                                                                                                                                                                                                                                                                                                                                                                                                                                                                                                                                                                                                                                                                                                                                                                                                                                                                                                                                                                                                                                                                                                                                                                                                                                                                                                                                                                                                                                                                                                                                                                                                                                                                                                                                                                                                                                                                                                                                                                                                                                                                                                                                                                                                                                                                                                                                                                                                                                                                                                                                                                                                                                                                                                                                                                                                                                                                                                                                                                                                                                                                                                                                                                                                                                                                                                                                                                                                                                                                                                                                                                                                                                                                                                                                                                         |
| <b>AND Low- and Middle-Income Country terms</b>                                                                                                                                                                                                                                                                                                                                                                                                                                                                                                                                                                                                                                                                                                                                                                                                                                                                                                                                                                                                                                                                                                                                                                                                                                                                                                                                                                                                                                                                                                                                                                                                                                                                                                                                                                                                                                                                                                                                                                                                                                                                                                                                                                                                                                                                                                                                                                                                                                                                                                                                                                                                                                                                                                                                                                                                                                                                                                                                                                                                                                                                                                                                                                                                                                                                                                                                                                                                                                                                                                                                                                                                                                                                                                                                                                                                                                                                                                                                                                                                                                                                                                                                                                                                                                                                                                                                                                                                                                                      |
| TI=("Afghanistan" OR "Albania" OR "Algeria" OR "American Samoa" OR "Angola" OR "Armenia" OR "Azerbaijan" OR "Bangladesh" OR "Belarus" OR "Byelarus" OR "Belorussia" OR "Belize" OR "Benin" OR "Bhutan" OR "Bolivia" OR "Bosnia" OR "Botswana" OR "Brazil" OR "Bulgaria" OR "Burma" OR "Burkina Faso" OR "Burundi" OR "Cabo Verde" OR "Cape Verde" OR "Cambodia" OR "Cameroon" OR "Central African Republic" OR "Chad" OR "China" OR "Colombia" OR "Comoros" OR "Comores" OR "Comoro" OR "Congo" OR "Costa Rica" OR "Côte d'Ivoire" OR "Cuba" OR "Djibouti" OR "Dominica" OR "Dominican Republic" OR "Ecuador" OR "Egypt" OR "El Salvador" OR "Eritrea" OR "Ethiopia" OR "Fiji" OR "Gabon" OR "Gambia" OR "Gaza" OR "Georgia" OR "Georgia Republic" OR "Ghana" OR "Grenada" OR "Grenadines" OR "Guatemala" OR "Guinea" OR "Guinea Bissau" OR "Guyana" OR "Haiti" OR "Herzegovina" OR "Hercegovina" OR "Honduras" OR "India" OR "Indonesia" OR "Iran" OR "Iraq" OR "Jamaica" OR "Jordan" OR "Kazakhstan" OR "Kenya" OR "Kiribati" OR "Korea" OR "Kosovo" OR "Kyrgyz" OR "Kirghizia" OR "Kirghiz" OR "Kyrgyzstan" OR "Lao PDR" OR "Laos" OR "Lebanon" OR "Lesotho" OR "Liberia" OR "Libya" OR "Macedonia" OR "Madagascar" OR "Malawi" OR "Malay" OR "Malaya" OR "Malaysia" OR "Maldives" OR "Mali" OR "Marshall Islands" OR "Mauritania" OR "Mauritius" OR "Mexico" OR "Micronesia" OR "Moldova" OR "Mongolia" OR "Montenegro" OR "Morocco" OR "Mozambique" OR "Myanmar" OR "Namibia" OR "Nepal" OR "Nicaragua" OR "Niger" OR "Nigeria" OR "Pakistan" OR "Palau" OR "Panama" OR "Papua New Guinea" OR "Paraguay" OR "Peru" OR "Philippines" OR "Principe" OR "Romania" OR "Rwanda" OR "Ruanda" OR "Samoa" OR "Sao Tome" OR "Senegal" OR "Serbia" OR "Sierra Leone" OR "Solomon Islands" OR "Somalia" OR "South Africa" OR "South Sudan" OR "Sri Lanka" OR "St Lucia" OR "St Vincent" OR "Sudan" OR "Surinam" OR "Suriname" OR "Swaziland" OR "Syria" OR "Syrian Arab Republic" OR "Tajikistan" OR "Tadjikistan" OR "Tajikistan" OR "Tadzhik" OR "Tanzania" OR "Thailand" OR "Timor" OR "Togo" OR "Tonga" OR "Tunisia" OR "Turkey" OR "Turkmen" OR "Turkmenistan" OR "Tuvalu" OR "Uganda" OR "Ukraine" OR "Uzbek" OR "Uzbekistan" OR "Vanuatu" OR "Vietnam" OR "West Bank" OR "Yemen" OR "Zambia" OR "Zimbabwe" OR "Deprived Countries" OR "Deprived Population" OR "Deprived Populations" OR "Developing Countries" OR "Developing Country" OR "Developing Economies" OR "Developing Economy" OR "Developing Nation" OR "Developing Nations" OR "Developing Population" OR "Developing Populations" OR "Developing World" OR "LAMI Countries" OR "LAMI Country" OR "Less Developed Countries" OR "Less Developed Country" OR "Less Developed Economies" OR "Less Developed Nation" OR "Less Developed Nations" OR "Less Developed World" OR "Lesser Developed Countries" OR "Lesser Developed Nations" OR "LMIC" OR "LMICS" OR "Low GDP" OR "Low GNP" OR "Low Gross Domestic" OR "Low Gross National" OR "Low Income Countries" OR "Low Income Country" OR "Low Income Economies" OR "Low Income Economy" OR "Low Income Nations" OR "Low Income Population" OR "Low Income Populations" OR "Lower GDP" OR "lower gross domestic" OR "Lower Income Countries" OR "Lower Income Country" OR "Lower Income Nations" OR "Lower Income Population" OR "Lower Income Populations" OR "Middle Income Countries" OR "Middle Income Country" OR "Middle Income Economies" OR "Middle Income Nation" OR "Middle Income Nations" OR "Middle Income Population" OR "Middle Income Populations" OR "Poor Countries" OR "Poor Country" OR "Poor Economies" OR "Poor Economy" OR "Poor Nation" OR "Poor Nations" OR "Poor Population" OR "Poor Populations" OR "poor world" OR "Poorer Countries" OR "Poorer Economies" OR "Poorer Economy" OR "Poorer Nations" OR "Poorer Population" OR "Poorer Populations" OR "Third World" OR "Transitional Countries" OR "Transitional Country" OR "Transitional Economies" OR "Transitional Economy" OR "Under Developed Countries" OR "Under Developed Country" OR "under developed nations" OR "Under Developed World" OR "Under Served Population" OR "Under Served Populations" OR "Underdeveloped Countries" OR "Underdeveloped Country" OR "underdeveloped economies" OR "underdeveloped nations" OR "underdeveloped population" OR "Underdeveloped World" OR "Underserved Countries" OR "Underserved Nations" OR "Underserved Population" OR "Underserved Populations") |
| TS=("Afghanistan" OR "Albania" OR "Algeria" OR "American Samoa" OR "Angola" OR "Armenia" OR "Azerbaijan" OR "Bangladesh" OR "Belarus" OR "Byelarus" OR "Belorussia" OR "Belize" OR "Benin" OR "Bhutan" OR "Bolivia" OR "Bosnia" OR "Botswana" OR "Brazil" OR "Bulgaria" OR "Burma" OR "Burkina Faso" OR "Burundi" OR "Cabo Verde" OR "Cape Verde" OR "Cambodia" OR "Cameroon" OR "Central                                                                                                                                                                                                                                                                                                                                                                                                                                                                                                                                                                                                                                                                                                                                                                                                                                                                                                                                                                                                                                                                                                                                                                                                                                                                                                                                                                                                                                                                                                                                                                                                                                                                                                                                                                                                                                                                                                                                                                                                                                                                                                                                                                                                                                                                                                                                                                                                                                                                                                                                                                                                                                                                                                                                                                                                                                                                                                                                                                                                                                                                                                                                                                                                                                                                                                                                                                                                                                                                                                                                                                                                                                                                                                                                                                                                                                                                                                                                                                                                                                                                                                            |

African Republic" OR "Chad" OR "China" OR "Colombia" OR "Comoros" OR "Comores" OR "Comoro" OR "Congo" OR "Costa Rica" OR "Côte d'Ivoire" OR "Cuba" OR "Djibouti" OR "Dominica" OR "Dominican Republic" OR "Ecuador" OR "Egypt" OR "El Salvador" OR "Eritrea" OR "Ethiopia" OR "Fiji" OR "Gabon" OR "Gambia" OR "Gaza" OR "Georgia" OR "Georgia Republic" OR "Ghana" OR "Grenada" OR "Grenadines" OR "Guatemala" OR "Guinea" OR "Guinea Bissau" OR "Guyana" OR "Haiti" OR "Herzegovina" OR "Hercegovina" OR "Honduras" OR "India" OR "Indonesia" OR "Iran" OR "Iraq" OR "Jamaica" OR "Jordan" OR "Kazakhstan" OR "Kenya" OR "Kiribati" OR "Korea" OR "Kosovo" OR "Kyrgyz" OR "Kirghizia" OR "Kirghiz" OR "Kyrgyzstan" OR "Lao PDR" OR "Laos" OR "Lebanon" OR "Lesotho" OR "Liberia" OR "Libya" OR "Macedonia" OR "Madagascar" OR "Malawi" OR "Malay" OR "Malaya" OR "Malaysia" OR "Maldives" OR "Mali" OR "Marshall Islands" OR "Mauritania" OR "Mauritius" OR "Mexico" OR "Micronesia" OR "Moldova" OR "Mongolia" OR "Montenegro" OR "Morocco" OR "Mozambique" OR "Myanmar" OR "Namibia" OR "Nepal" OR "Nicaragua" OR "Niger" OR "Nigeria" OR "Pakistan" OR "Palau" OR "Panama" OR "Papua New Guinea" OR "Paraguay" OR "Peru" OR "Philippines" OR "Principe" OR "Romania" OR "Rwanda" OR "Ruanda" OR "Samoa" OR "Sao Tome" OR "Senegal" OR "Serbia" OR "Sierra Leone" OR "Solomon Islands" OR "Somalia" OR "South Africa" OR "South Sudan" OR "Sri Lanka" OR "St Lucia" OR "St Vincent" OR "Sudan" OR "Surinam" OR "Suriname" OR "Swaziland" OR "Syria" OR "Syrian Arab Republic" OR "Tajikistan" OR "Tadzhikistan" OR "Tajikistan" OR "Tadzhik" OR "Tanzania" OR "Thailand" OR "Timor" OR "Togo" OR "Tonga" OR "Tunisia" OR "Turkey" OR "Turkmen" OR "Turkmenistan" OR "Tuvalu" OR "Uganda" OR "Ukraine" OR "Uzbek" OR "Uzbekistan" OR "Vanuatu" OR "Vietnam" OR "West Bank" OR "Yemen" OR "Zambia" OR "Zimbabwe" OR "Deprived Countries" OR "Deprived Population" OR "Deprived Populations" OR "Developing Countries" OR "Developing Country" OR "Developing Economies" OR "Developing Economy" OR "Developing Nation" OR "Developing Nations" OR "Developing Population" OR "Developing Populations" OR "Developing World" OR "LAMI Countries" OR "LAMI Country" OR "Less Developed Countries" OR "Less Developed Country" OR "Less Developed Economies" OR "Less Developed Nation" OR "Less Developed Nations" OR "Less Developed World" OR "Lesser Developed Countries" OR "Lesser Developed Nations" OR "LMIC" OR "LMICS" OR "Low GDP" OR "Low GNP" OR "Low Gross Domestic" OR "Low Gross National" OR "Low Income Countries" OR "Low Income Country" OR "Low Income Economies" OR "Low Income Economy" OR "Low Income Nations" OR "Low Income Population" OR "Low Income Populations" OR "Lower GDP" OR "lower gross domestic" OR "Lower Income Countries" OR "Lower Income Country" OR "Lower Income Nations" OR "Lower Income Population" OR "Lower Income Populations" OR "Middle Income Countries" OR "Middle Income Country" OR "Middle Income Economies" OR "Middle Income Nation" OR "Middle Income Nations" OR "Middle Income Population" OR "Middle Income Populations" OR "Poor Countries" OR "Poor Country" OR "Poor Economies" OR "Poor Economy" OR "Poor Nation" OR "Poor Nations" OR "Poor Population" OR "Poor Populations" OR "poor world" OR "Poorer Countries" OR "Poorer Economies" OR "Poorer Economy" OR "Poorer Nations" OR "Poorer Population" OR "Poorer Populations" OR "Third World" OR "Transitional Countries" OR "Transitional Country" OR "Transitional Economies" OR "Transitional Economy" OR "Under Developed Countries" OR "Under Developed Country" OR "under developed nations" OR "Under Developed World" OR "Under Served Population" OR "Under Served Populations" OR "Underdeveloped Countries" OR "Underdeveloped Country" OR "underdeveloped economies" OR "underdeveloped nations" OR "underdeveloped population" OR "Underdeveloped World" OR "Underserved Countries" OR "Underserved Nations" OR "Underserved Population" OR "Underserved Populations")

**Ebsco search (CINAHL, PsychINFO, Africa Wide, Academic Search Premier, Health Source Nursing Academic, and EconLit)**

|                                                                                                                                                                                                                                                                                                                                                                                                                                                                                                                                                                                                                                  |
|----------------------------------------------------------------------------------------------------------------------------------------------------------------------------------------------------------------------------------------------------------------------------------------------------------------------------------------------------------------------------------------------------------------------------------------------------------------------------------------------------------------------------------------------------------------------------------------------------------------------------------|
| <b>Healthcare terms</b>                                                                                                                                                                                                                                                                                                                                                                                                                                                                                                                                                                                                          |
| TI ( "health" OR "healthcare" OR "primary care" OR "nutrition" OR "nutritional" OR "malnutrition" OR "family planning" OR "primary health care" OR "primary healthcare" OR "community health services" ) OR AB ( "health" OR "healthcare" OR "primary care" OR "nutrition" OR "nutritional" OR "malnutrition" OR "family planning" OR "primary health care" OR "primary healthcare" OR "community health services" ) OR SU ( "health" OR "healthcare" OR "primary care" OR "nutrition" OR "nutritional" OR "malnutrition" OR "family planning" OR "primary health care" OR "primary healthcare" OR "community health services" ) |
| <b>AND Community terms</b>                                                                                                                                                                                                                                                                                                                                                                                                                                                                                                                                                                                                       |
| TI ( "community" OR "communities" OR "community-based" OR "community based" OR "home-based" OR "home based" OR "village" ) OR AB ( "community" OR "communities" OR "community-based" OR "community based" OR "home-based" OR "home based" OR "village" ) OR SU ( "community" OR "communities" OR "community-based" OR "community based" OR "home-based" OR "home based" OR "village" )                                                                                                                                                                                                                                           |
| <b>AND Community Health Worker terms</b>                                                                                                                                                                                                                                                                                                                                                                                                                                                                                                                                                                                         |
| TI ( "community health workers" OR "community health worker" OR "community-based health workers" OR "community-based health worker" OR "community based health workers" OR "community based health worker" OR "community healthcare workers" OR "community healthcare worker" OR "community health care workers" OR "community health care worker" OR "community volunteers" OR "community volunteer" OR "community health volunteers" OR "community health volunteer" OR "volunteer health workers" OR                                                                                                                          |



"volunteer health worker" OR "voluntary health workers" OR "voluntary health worker" OR "lay health workers" OR "lay health worker" OR "community relays" OR "community relay" OR "relais communautaires" OR "relais communautaire" OR "lady health workers" OR "lady health worker" OR "lady health visitors" OR "lady health visitor" OR "community based distributors" OR "community based distributor" OR "community-based distribution" OR "community based distribution" OR "community-based distributors" OR "community-based distributor" OR "community health distributors" OR "community health distributor" OR "community based agents" OR "community based agent" OR "community-based agents" OR "community-based agent" OR "health extension workers" OR "health extension worker" OR "community health agents" OR "community health agent" OR "agents de santé" OR "agent de santé" OR "agents de sante" OR "agent de sante" OR "health surveillance assistants" OR "health surveillance assistant" OR "community health assistants" OR "community health assistant" OR "community health surveyors" OR "community health surveyor" OR "community health promoters" OR "community health promoter" OR "rural health auxiliaries" OR "rural health auxiliary" OR "community owned resource persons" OR "community owned resource person" OR "community-owned resource persons" OR "community-owned resource person" OR "health aides" OR "health aide" OR "allied health personnel" OR "voluntary workers" OR "voluntary worker" OR "home nursing aides" OR "home nursing aide" OR "peer groups" OR "peer group" OR "doulas" OR "doula" OR "barefoot doctors" OR "barefoot doctor" OR "backpack health workers" OR "backpack health worker" OR "back pack health workers" OR "back pack health worker" OR "backpack health care workers" OR "backpack health care worker" OR "back pack health care workers" OR "back pack health care worker" OR "backpack healthcare workers" OR "backpack healthcare worker" OR "back pack healthcare workers" OR "back pack healthcare worker" OR "brigadistas" OR "brigadista" OR "community networks" OR "community network" OR "village polio volunteers" OR "village polio volunteer" OR "outreach volunteers" OR "outreach volunteer" OR "outreach workers" OR "outreach worker" OR "community networks" OR "community network" OR "community health nurses" OR "community health nurse" OR "community health officers" OR "community health officer" OR "village health workers" OR "village health worker" OR "village health volunteers" OR "village health volunteer" OR "malaria agents" OR "malaria agent" OR "community mobilizers" OR "community mobilizer" OR "community mobilisers" OR "community mobiliser" OR "polio volunteers" OR "polio volunteer" OR "volunteer health advisors" OR "volunteer health advisor" OR "village-based family planning workers" OR "village-based family planning worker" OR "village based family planning workers" OR "village based family planning worker" OR "community nutrition workers" OR "community nutrition worker" OR "community-based nutrition workers" OR "community-based nutrition worker" OR "community based nutrition workers" OR "community based nutrition worker" OR "community nutrition volunteers" OR "community nutrition volunteer" OR "community-based nutrition volunteers" OR "community-based nutrition volunteer" OR "community based nutrition volunteers" OR "community based nutrition volunteer" OR "accredited social health activists" OR "accredited social health activist" OR "anganwadi workers" OR "anganwadi worker" OR "agentes comunitários de saúde" OR "agente comunitário de saúde" OR "agentes comunitarios de saude" OR "agente comunitario de saude" OR "agentes polivalentes elementares" OR "agente polivalente elementar" OR "agentes comunitários de salud" OR "agente comunitário de salud" OR "agentes comunitarios de salud" OR "agente comunitarios de salud" OR "activistas" OR "activista" OR "barangay health workers" OR "barangay health worker" OR "colaboradores voluntários" OR "colaborador voluntário" OR "community drug distributors" OR "community drug distributor" OR "community health representatives" OR "community health representative" OR "female multipurpose health workers" OR "female multipurpose health worker" OR "female multi-purpose health workers" OR "female multi-purpose health worker" OR "kaders" OR "kader" OR "promotoras" OR "promotora" OR "rural health motivators" OR "rural health motivator" OR "village drug-kit managers" OR "village drug-kit manager" OR "village drug kit managers" OR "village drug kit manager" OR "village health helpers" OR "village health helper" OR "traditional birth attendants" OR "traditional birth attendant" OR "midwives" OR "midwife" OR "midwifery" OR "lay maternal health workers" OR "lay maternal health worker" ) OR AB ( "community health workers" OR "community health worker" OR "community-based health workers" OR "community-based health worker" OR "community based health workers" OR "community based health worker" OR "community healthcare workers" OR "community healthcare worker" OR "community health care workers" OR "community health care worker" OR "community volunteers" OR "community volunteer" OR "community health volunteers" OR "community health volunteer" OR "volunteer health workers" OR "volunteer health worker" OR "voluntary health workers" OR "voluntary health worker" OR "lay health workers" OR "lay health worker" OR "community relays" OR "community relay" OR "relais communautaires" OR "relais communautaire" OR "lady health workers" OR "lady health worker" OR "lady health visitors" OR "lady health visitor" OR "community based distributors" OR "community based distributor" OR "community-based distribution" OR "community based distribution" OR "community-based distributors" OR "community-based distributor" OR "community health distributors" OR "community health distributor" OR "community based agents" OR "community based agent" OR "community-based agents" OR "community-based agent" OR "health extension workers" OR "health extension worker" OR "community health agents" OR "community health agent" OR "agents de santé" OR "agent de santé" OR "agents de sante" OR "agent de sante" OR "health surveillance assistants" OR "health surveillance assistant" OR "community health assistants" OR "community health assistant" OR "community health surveyors" OR "community health surveyor" OR "community health promoters" OR "community health promoter" OR "rural health auxiliaries" OR "rural health auxiliary" OR "community owned resource persons" OR "community owned resource person" OR "community-owned resource persons" OR "community-owned resource person"

OR "health aides" OR "health aide" OR "allied health personnel" OR "voluntary workers" OR "voluntary worker" OR "home nursing aides" OR "home nursing aide" OR "peer groups" OR "peer group" OR "doulas" OR "doula" OR "barefoot doctors" OR "barefoot doctor" OR "backpack health workers" OR "backpack health worker" OR "back pack health workers" OR "back pack health worker" OR "backpack health care workers" OR "backpack health care worker" OR "back pack health care workers" OR "back pack health care worker" OR "backpack healthcare workers" OR "backpack healthcare worker" OR "back pack healthcare workers" OR "back pack healthcare worker" OR "brigadistas" OR "brigadista" OR "community networks" OR "community network" OR "village polio volunteers" OR "village polio volunteer" OR "outreach volunteers" OR "outreach volunteer" OR "outreach workers" OR "outreach worker" OR "community networks" OR "community network" OR "community health nurses" OR "community health nurse" OR "community health officers" OR "community health officer" OR "village health workers" OR "village health worker" OR "village health volunteers" OR "village health volunteer" OR "malaria agents" OR "malaria agent" OR "community mobilizers" OR "community mobilizer" OR "community mobilisers" OR "community mobiliser" OR "polio volunteers" OR "polio volunteer" OR "volunteer health advisors" OR "volunteer health advisor" OR "village-based family planning workers" OR "village-based family planning worker" OR "village based family planning workers" OR "village based family planning worker" OR "community nutrition workers" OR "community nutrition worker" OR "community-based nutrition workers" OR "community-based nutrition worker" OR "community based nutrition workers" OR "community based nutrition worker" OR "community nutrition volunteers" OR "community nutrition volunteer" OR "community-based nutrition volunteers" OR "community-based nutrition volunteer" OR "community based nutrition volunteers" OR "community based nutrition volunteer" OR "accredited social health activists" OR "accredited social health activist" OR "anganwadi workers" OR "anganwadi worker" OR "agentes comunitários de saúde" OR "agente comunitário de saúde" OR "agentes comunitarios de saude" OR "agente comunitario de saude" OR "agentes polivalentes elementares" OR "agente polivalente elementar" OR "agentes comunitários de salud" OR "agente comunitário de salud" OR "agentes comunitarios de salud" OR "agente comunitarios de salud" OR "activistas" OR "activista" OR "barangay health workers" OR "barangay health worker" OR "colaboradores voluntários" OR "colaborador voluntário" OR "community drug distributors" OR "community drug distributor" OR "community health representatives" OR "community health representative" OR "female multipurpose health workers" OR "female multipurpose health worker" OR "female multi-purpose health workers" OR "female multi-purpose health worker" OR "kaders" OR "kader" OR "promotoras" OR "promotora" OR "rural health motivators" OR "rural health motivator" OR "village drug-kit managers" OR "village drug-kit manager" OR "village drug kit managers" OR "village drug kit manager" OR "village health helpers" OR "village health helper" OR "traditional birth attendants" OR "traditional birth attendant" OR "midwives" OR "midwife" OR "midwifery" OR "lay maternal health workers" OR "lay maternal health worker" ) OR SU ( "community health workers" OR "community health worker" OR "community-based health workers" OR "community-based health worker" OR "community based health workers" OR "community based health worker" OR "community healthcare workers" OR "community healthcare worker" OR "community health care workers" OR "community health care worker" OR "community volunteers" OR "community volunteer" OR "community health volunteers" OR "community health volunteer" OR "volunteer health workers" OR "volunteer health worker" OR "voluntary health workers" OR "voluntary health worker" OR "lay health workers" OR "lay health worker" OR "community relays" OR "community relay" OR "relais communautaires" OR "relais communautaire" OR "lady health workers" OR "lady health worker" OR "lady health visitors" OR "lady health visitor" OR "community based distributors" OR "community based distributor" OR "community-based distribution" OR "community based distribution" OR "community-based distributors" OR "community-based distributor" OR "community health distributors" OR "community health distributor" OR "community based agents" OR "community based agent" OR "community-based agents" OR "community-based agent" OR "health extension workers" OR "health extension worker" OR "community health agents" OR "community health agent" OR "agents de santé" OR "agent de santé" OR "agents de sante" OR "agent de sante" OR "health surveillance assistants" OR "health surveillance assistant" OR "community health assistants" OR "community health assistant" OR "community health surveyors" OR "community health surveyor" OR "community health promoters" OR "community health promoter" OR "rural health auxiliaries" OR "rural health auxiliary" OR "community owned resource persons" OR "community owned resource person" OR "community-owned resource persons" OR "community-owned resource person" OR "health aides" OR "health aide" OR "allied health personnel" OR "voluntary workers" OR "voluntary worker" OR "home nursing aides" OR "home nursing aide" OR "peer groups" OR "peer group" OR "doulas" OR "doula" OR "barefoot doctors" OR "barefoot doctor" OR "backpack health workers" OR "backpack health worker" OR "back pack health workers" OR "back pack health worker" OR "backpack health care workers" OR "backpack health care worker" OR "back pack health care workers" OR "back pack health care worker" OR "backpack healthcare workers" OR "backpack healthcare worker" OR "back pack healthcare workers" OR "back pack healthcare worker" OR "brigadistas" OR "brigadista" OR "community networks" OR "community network" OR "village polio volunteers" OR "village polio volunteer" OR "outreach volunteers" OR "outreach volunteer" OR "outreach workers" OR "outreach worker" OR "community networks" OR "community network" OR "community health nurses" OR "community health nurse" OR "community health officers" OR "community health officer" OR "village health workers" OR "village health worker" OR "village health volunteers" OR "village health volunteer" OR "malaria agents" OR "malaria agent" OR "community mobilizers" OR "community mobilizer" OR "community mobilisers" OR "community mobiliser" OR "polio volunteers" OR "polio volunteer" OR "volunteer health advisors" OR

"volunteer health advisor" OR "village-based family planning workers" OR "village-based family planning worker" OR "village based family planning workers" OR "village based family planning worker" OR "community nutrition workers" OR "community nutrition worker" OR "community-based nutrition workers" OR "community-based nutrition worker" OR "community based nutrition workers" OR "community based nutrition worker" OR "community nutrition volunteers" OR "community nutrition volunteer" OR "community-based nutrition volunteers" OR "community-based nutrition volunteer" OR "community based nutrition volunteers" OR "community based nutrition volunteer" OR "accredited social health activists" OR "accredited social health activist" OR "anganwadi workers" OR "anganwadi worker" OR "agentes comunitários de saúde" OR "agente comunitário de saúde" OR "agentes comunitarios de saude" OR "agente comunitario de saude" OR "agentes polivalentes elementares" OR "agente polivalente elementar" OR "agentes comunitários de salud" OR "agente comunitário de salud" OR "agentes comunitarios de salud" OR "agente comunitarios de salud" OR "activistas" OR "activista" OR "barangay health workers" OR "barangay health worker" OR "colaboradores voluntários" OR "colaborador voluntário" OR "community drug distributors" OR "community drug distributor" OR "community health representatives" OR "community health representative" OR "female multipurpose health workers" OR "female multipurpose health worker" OR "female multi-purpose health workers" OR "female multi-purpose health worker" OR "kaders" OR "kader" OR "promotoras" OR "promotora" OR "rural health motivators" OR "rural health motivator" OR "village drug-kit managers" OR "village drug-kit manager" OR "village drug kit managers" OR "village drug kit manager" OR "village health helpers" OR "village health helper" OR "traditional birth attendants" OR "traditional birth attendant" OR "midwives" OR "midwife" OR "midwifery" OR "lay maternal health workers" OR "lay maternal health worker" )

**AND Humanitarian Settings terms**

TI ( "emergency" OR "emergencies" OR "humanitarian" OR "disaster" OR "disasters" OR "outbreak" OR "outbreaks" OR "epidemic" OR "epidemics" OR "crisis" OR "crises" OR "insecurity" OR "war" OR "wars" OR "war-torn" OR "warfare" OR "conflict" OR "conflicts" OR "tsunami" OR "tsunamis" OR "flooding" OR "flood" OR "floods" OR "cyclone" OR "cyclones" OR "hurricane" OR "hurricanes" OR "earthquake" OR "earthquakes" OR "drought" OR "droughts" OR "famine" OR "famines" OR "refugee" OR "refugees" OR "displaced" OR "displacement" OR "armed conflict" "emergency" OR "emergencies" OR "humanitarian" OR "disaster" OR "disasters" OR "outbreak" OR "outbreaks" OR "epidemic" OR "epidemics" OR "crisis" OR "crises" OR "insecurity" OR "war" OR "wars" OR "war-torn" OR "warfare" OR "conflict" OR "conflicts" OR "tsunami" OR "tsunamis" OR "flooding" OR "flood" OR "floods" OR "cyclone" OR "cyclones" OR "hurricane" OR "hurricanes" OR "earthquake" OR "earthquakes" OR "drought" OR "droughts" OR "famine" OR "famines" OR "refugee" OR "refugees" OR "displaced" OR "displacement" OR "armed conflict" ) OR AB ( "emergency" OR "emergencies" OR "humanitarian" OR "disaster" OR "disasters" OR "outbreak" OR "outbreaks" OR "epidemic" OR "epidemics" OR "crisis" OR "crises" OR "insecurity" OR "war" OR "wars" OR "war-torn" OR "warfare" OR "conflict" OR "conflicts" OR "tsunami" OR "tsunamis" OR "flooding" OR "flood" OR "floods" OR "cyclone" OR "cyclones" OR "hurricane" OR "hurricanes" OR "earthquake" OR "earthquakes" OR "drought" OR "droughts" OR "famine" OR "famines" OR "refugee" OR "refugees" OR "displaced" OR "displacement" OR "armed conflict" "emergency" OR "emergencies" OR "humanitarian" OR "disaster" OR "disasters" OR "outbreak" OR "outbreaks" OR "epidemic" OR "epidemics" OR "crisis" OR "crises" OR "insecurity" OR "war" OR "wars" OR "war-torn" OR "warfare" OR "conflict" OR "conflicts" OR "tsunami" OR "tsunamis" OR "flooding" OR "flood" OR "floods" OR "cyclone" OR "cyclones" OR "hurricane" OR "hurricanes" OR "earthquake" OR "earthquakes" OR "drought" OR "droughts" OR "famine" OR "famines" OR "refugee" OR "refugees" OR "displaced" OR "displacement" OR "armed conflict" ) OR SU ( "emergency" OR "emergencies" OR "humanitarian" OR "disaster" OR "disasters" OR "outbreak" OR "outbreaks" OR "epidemic" OR "epidemics" OR "crisis" OR "crises" OR "insecurity" OR "war" OR "wars" OR "war-torn" OR "warfare" OR "conflict" OR "conflicts" OR "tsunami" OR "tsunamis" OR "flooding" OR "flood" OR "floods" OR "cyclone" OR "cyclones" OR "hurricane" OR "hurricanes" OR "earthquake" OR "earthquakes" OR "drought" OR "droughts" OR "famine" OR "famines" OR "refugee" OR "refugees" OR "displaced" OR "displacement" OR "armed conflict" "emergency" OR "emergencies" OR "humanitarian" OR "disaster" OR "disasters" OR "outbreak" OR "outbreaks" OR "epidemic" OR "epidemics" OR "crisis" OR "crises" OR "insecurity" OR "war" OR "wars" OR "war-torn" OR "warfare" OR "conflict" OR "conflicts" OR "tsunami" OR "tsunamis" OR "flooding" OR "flood" OR "floods" OR "cyclone" OR "cyclones" OR "hurricane" OR "hurricanes" OR "earthquake" OR "earthquakes" OR "drought" OR "droughts" OR "famine" OR "famines" OR "refugee" OR "refugees" OR "displaced" OR "displacement" OR "armed conflict" )

**AND Low- and Middle-Income Country terms**

TI ( "Afghanistan" OR "Albania" OR "Algeria" OR "American Samoa" OR "Angola" OR "Armenia" OR "Azerbaijan" OR "Bangladesh" OR "Belarus" OR "Byelarus" OR "Belorussia" OR "Belize" OR "Benin" OR "Bhutan" OR "Bolivia" OR "Bosnia" OR "Botswana" OR "Brazil" OR "Bulgaria" OR "Burma" OR "Burkina Faso" OR "Burundi" OR "Cabo Verde" OR "Cape Verde" OR "Cambodia" OR "Cameroon" OR "Central African Republic" OR "Chad" OR "China" OR "Colombia" OR "Comoros" OR "Comores" OR "Comoro" OR "Congo" OR "Costa Rica" OR "Côte d'Ivoire" OR "Cuba" OR "Djibouti" OR "Dominica" OR "Dominican Republic" OR "Ecuador" OR "Egypt" OR "El Salvador" OR "Eritrea" OR "Ethiopia" OR "Fiji" OR "Gabon" OR "Gambia" OR "Gaza" OR "Georgia" OR "Georgia Republic" OR "Ghana" OR "Grenada" OR "Grenadines" OR "Guatemala" OR "Guinea" OR "Guinea Bissau" OR "Guyana" OR "Haiti" OR "Herzegovina" OR "Hercegovina" OR "Honduras" OR "India" OR "Indonesia" OR "Iran" OR "Iraq" OR "Jamaica" OR "Jordan" OR "Kazakhstan" OR "Kenya" OR "Kiribati" OR "Korea" OR "Kosovo" OR "Kyrgyz" OR "Kirghizia" OR "Kirghiz" OR "Kyrgyzstan" OR "Lao PDR" OR "Laos" OR "Lebanon" OR "Lesotho" OR

"Liberia" OR "Libya" OR "Macedonia" OR "Madagascar" OR "Malawi" OR "Malay" OR "Malaya" OR "Malaysia" OR "Maldives" OR "Mali" OR "Marshall Islands" OR "Mauritania" OR "Mauritius" OR "Mexico" OR "Micronesia" OR "Moldova" OR "Mongolia" OR "Montenegro" OR "Morocco" OR "Mozambique" OR "Myanmar" OR "Namibia" OR "Nepal" OR "Nicaragua" OR "Niger" OR "Nigeria" OR "Pakistan" OR "Palau" OR "Panama" OR "Papua New Guinea" OR "Paraguay" OR "Peru" OR "Philippines" OR "Principe" OR "Romania" OR "Rwanda" OR "Ruanda" OR "Samoa" OR "Sao Tome" OR "Senegal" OR "Serbia" OR "Sierra Leone" OR "Solomon Islands" OR "Somalia" OR "South Africa" OR "South Sudan" OR "Sri Lanka" OR "St Lucia" OR "St Vincent" OR "Sudan" OR "Surinam" OR "Suriname" OR "Swaziland" OR "Syria" OR "Syrian Arab Republic" OR "Tajikistan" OR "Tadzhikistan" OR "Tajikistan" OR "Tadzhik" OR "Tanzania" OR "Thailand" OR "Timor" OR "Togo" OR "Tonga" OR "Tunisia" OR "Turkey" OR "Turkmen" OR "Turkmenistan" OR "Tuvalu" OR "Uganda" OR "Ukraine" OR "Uzbek" OR "Uzbekistan" OR "Vanuatu" OR "Vietnam" OR "West Bank" OR "Yemen" OR "Zambia" OR "Zimbabwe" OR "Deprived Countries" OR "Deprived Population" OR "Deprived Populations" OR "Developing Countries" OR "Developing Country" OR "Developing Economies" OR "Developing Economy" OR "Developing Nation" OR "Developing Nations" OR "Developing Population" OR "Developing Populations" OR "Developing World" OR "LAMI Countries" OR "LAMI Country" OR "Less Developed Countries" OR "Less Developed Country" OR "Less Developed Economies" OR "Less Developed Nation" OR "Less Developed Nations" OR "Less Developed World" OR "Lesser Developed Countries" OR "Lesser Developed Nations" OR "LMIC" OR "LMICS" OR "Low GDP" OR "Low GNP" OR "Low Gross Domestic" OR "Low Gross National" OR "Low Income Countries" OR "Low Income Country" OR "Low Income Economies" OR "Low Income Economy" OR "Low Income Nations" OR "Low Income Population" OR "Low Income Populations" OR "Lower GDP" OR "lower gross domestic" OR "Lower Income Countries" OR "Lower Income Country" OR "Lower Income Nations" OR "Lower Income Population" OR "Lower Income Populations" OR "Middle Income Countries" OR "Middle Income Country" OR "Middle Income Economies" OR "Middle Income Nation" OR "Middle Income Nations" OR "Middle Income Population" OR "Middle Income Populations" OR "Poor Countries" OR "Poor Country" OR "Poor Economies" OR "Poor Economy" OR "Poor Nation" OR "Poor Nations" OR "Poor Population" OR "Poor Populations" OR "poor world" OR "Poorer Countries" OR "Poorer Economies" OR "Poorer Economy" OR "Poorer Nations" OR "Poorer Population" OR "Poorer Populations" OR "Third World" OR "Transitional Countries" OR "Transitional Country" OR "Transitional Economies" OR "Transitional Economy" OR "Under Developed Countries" OR "Under Developed Country" OR "under developed nations" OR "Under Developed World" OR "Under Served Population" OR "Under Served Populations" OR "Underdeveloped Countries" OR "Underdeveloped Country" OR "underdeveloped economies" OR "underdeveloped nations" OR "underdeveloped population" OR "Underdeveloped World" OR "Underserved Countries" OR "Underserved Nations" OR "Underserved Population" OR "Underserved Populations" ) OR AB ( "Afghanistan" OR "Albania" OR "Algeria" OR "American Samoa" OR "Angola" OR "Armenia" OR "Azerbaijan" OR "Bangladesh" OR "Belarus" OR "Byelarus" OR "Belorussia" OR "Belize" OR "Benin" OR "Bhutan" OR "Bolivia" OR "Bosnia" OR "Botswana" OR "Brazil" OR "Bulgaria" OR "Burma" OR "Burkina Faso" OR "Burundi" OR "Cabo Verde" OR "Cape Verde" OR "Cambodia" OR "Cameroon" OR "Central African Republic" OR "Chad" OR "China" OR "Colombia" OR "Comoros" OR "Comores" OR "Comoro" OR "Congo" OR "Costa Rica" OR "Côte d'Ivoire" OR "Cuba" OR "Djibouti" OR "Dominica" OR "Dominican Republic" OR "Ecuador" OR "Egypt" OR "El Salvador" OR "Eritrea" OR "Ethiopia" OR "Fiji" OR "Gabon" OR "Gambia" OR "Gaza" OR "Georgia" OR "Georgia Republic" OR "Ghana" OR "Grenada" OR "Grenadines" OR "Guatemala" OR "Guinea" OR "Guinea Bissau" OR "Guyana" OR "Haiti" OR "Herzegovina" OR "Hercegovina" OR "Honduras" OR "India" OR "Indonesia" OR "Iran" OR "Iraq" OR "Jamaica" OR "Jordan" OR "Kazakhstan" OR "Kenya" OR "Kiribati" OR "Korea" OR "Kosovo" OR "Kyrgyz" OR "Kirghizia" OR "Kirghiz" OR "Kyrgyzstan" OR "Lao PDR" OR "Laos" OR "Lebanon" OR "Lesotho" OR "Liberia" OR "Libya" OR "Macedonia" OR "Madagascar" OR "Malawi" OR "Malay" OR "Malaya" OR "Malaysia" OR "Maldives" OR "Mali" OR "Marshall Islands" OR "Mauritania" OR "Mauritius" OR "Mexico" OR "Micronesia" OR "Moldova" OR "Mongolia" OR "Montenegro" OR "Morocco" OR "Mozambique" OR "Myanmar" OR "Namibia" OR "Nepal" OR "Nicaragua" OR "Niger" OR "Nigeria" OR "Pakistan" OR "Palau" OR "Panama" OR "Papua New Guinea" OR "Paraguay" OR "Peru" OR "Philippines" OR "Principe" OR "Romania" OR "Rwanda" OR "Ruanda" OR "Samoa" OR "Sao Tome" OR "Senegal" OR "Serbia" OR "Sierra Leone" OR "Solomon Islands" OR "Somalia" OR "South Africa" OR "South Sudan" OR "Sri Lanka" OR "St Lucia" OR "St Vincent" OR "Sudan" OR "Surinam" OR "Suriname" OR "Swaziland" OR "Syria" OR "Syrian Arab Republic" OR "Tajikistan" OR "Tadzhikistan" OR "Tajikistan" OR "Tadzhik" OR "Tanzania" OR "Thailand" OR "Timor" OR "Togo" OR "Tonga" OR "Tunisia" OR "Turkey" OR "Turkmen" OR "Turkmenistan" OR "Tuvalu" OR "Uganda" OR "Ukraine" OR "Uzbek" OR "Uzbekistan" OR "Vanuatu" OR "Vietnam" OR "West Bank" OR "Yemen" OR "Zambia" OR "Zimbabwe" OR "Deprived Countries" OR "Deprived Population" OR "Deprived Populations" OR "Developing Countries" OR "Developing Country" OR "Developing Economies" OR "Developing Economy" OR "Developing Nation" OR "Developing Nations" OR "Developing Population" OR "Developing Populations" OR "Developing World" OR "LAMI Countries" OR "LAMI Country" OR "Less Developed Countries" OR "Less Developed Country" OR "Less Developed Economies" OR "Less Developed Nation" OR "Less Developed Nations" OR "Less Developed World" OR "Lesser Developed Countries" OR "Lesser Developed Nations" OR "LMIC" OR "LMICS" OR "Low GDP" OR "Low GNP" OR "Low Gross Domestic" OR "Low Gross National" OR "Low Income Countries" OR "Low Income Country" OR "Low Income Economies" OR "Low Income Economy" OR "Low Income Nations" OR "Low Income Population" OR "Low Income Populations" OR "Lower GDP" OR "lower gross domestic" OR "Lower Income Countries" OR "Lower Income Country" OR "Lower Income Nations" OR "Lower Income Population" OR "Lower Income Populations" OR "Middle Income Countries" OR "Middle Income

Country" OR "Middle Income Economies" OR "Middle Income Nation" OR "Middle Income Nations" OR "Middle Income Population" OR "Middle Income Populations" OR "Poor Countries" OR "Poor Country" OR "Poor Economies" OR "Poor Economy" OR "Poor Nation" OR "Poor Nations" OR "Poor Population" OR "Poor Populations" OR "poor world" OR "Poorer Countries" OR "Poorer Economies" OR "Poorer Economy" OR "Poorer Nations" OR "Poorer Population" OR "Poorer Populations" OR "Third World" OR "Transitional Countries" OR "Transitional Country" OR "Transitional Economies" OR "Transitional Economy" OR "Under Developed Countries" OR "Under Developed Country" OR "under developed nations" OR "Under Developed World" OR "Under Served Population" OR "Under Served Populations" OR "Underdeveloped Countries" OR "Underdeveloped Country" OR "underdeveloped economies" OR "underdeveloped nations" OR "underdeveloped population" OR "Underdeveloped World" OR "Underserved Countries" OR "Underserved Nations" OR "Underserved Population" OR "Underserved Populations" ) OR SU ( "Afghanistan" OR "Albania" OR "Algeria" OR "American Samoa" OR "Angola" OR "Armenia" OR "Azerbaijan" OR "Bangladesh" OR "Belarus" OR "Byelarus" OR "Belorussia" OR "Belize" OR "Benin" OR "Bhutan" OR "Bolivia" OR "Bosnia" OR "Botswana" OR "Brazil" OR "Bulgaria" OR "Burma" OR "Burkina Faso" OR "Burundi" OR "Cabo Verde" OR "Cape Verde" OR "Cambodia" OR "Cameroon" OR "Central African Republic" OR "Chad" OR "China" OR "Colombia" OR "Comoros" OR "Comores" OR "Comoro" OR "Congo" OR "Costa Rica" OR "Côte d'Ivoire" OR "Cuba" OR "Djibouti" OR "Dominica" OR "Dominican Republic" OR "Ecuador" OR "Egypt" OR "El Salvador" OR "Eritrea" OR "Ethiopia" OR "Fiji" OR "Gabon" OR "Gambia" OR "Gaza" OR "Georgia" OR "Georgia Republic" OR "Ghana" OR "Grenada" OR "Grenadines" OR "Guatemala" OR "Guinea" OR "Guinea Bissau" OR "Guyana" OR "Haiti" OR "Herzegovina" OR "Hercegovina" OR "Honduras" OR "India" OR "Indonesia" OR "Iran" OR "Iraq" OR "Jamaica" OR "Jordan" OR "Kazakhstan" OR "Kenya" OR "Kiribati" OR "Korea" OR "Kosovo" OR "Kyrgyz" OR "Kirghizia" OR "Kirghiz" OR "Kyrgyzstan" OR "Lao PDR" OR "Laos" OR "Lebanon" OR "Lesotho" OR "Liberia" OR "Libya" OR "Macedonia" OR "Madagascar" OR "Malawi" OR "Malay" OR "Malaya" OR "Malaysia" OR "Maldives" OR "Mali" OR "Marshall Islands" OR "Mauritania" OR "Mauritius" OR "Mexico" OR "Micronesia" OR "Moldova" OR "Mongolia" OR "Montenegro" OR "Morocco" OR "Mozambique" OR "Myanmar" OR "Namibia" OR "Nepal" OR "Nicaragua" OR "Niger" OR "Nigeria" OR "Pakistan" OR "Palau" OR "Panama" OR "Papua New Guinea" OR "Paraguay" OR "Peru" OR "Philippines" OR "Principe" OR "Romania" OR "Rwanda" OR "Ruanda" OR "Samoa" OR "Sao Tome" OR "Senegal" OR "Serbia" OR "Sierra Leone" OR "Solomon Islands" OR "Somalia" OR "South Africa" OR "South Sudan" OR "Sri Lanka" OR "St Lucia" OR "St Vincent" OR "Sudan" OR "Surinam" OR "Suriname" OR "Swaziland" OR "Syria" OR "Syrian Arab Republic" OR "Tajikistan" OR "Tadzhikistan" OR "Tajikistan" OR "Tadzhik" OR "Tanzania" OR "Thailand" OR "Timor" OR "Togo" OR "Tonga" OR "Tunisia" OR "Turkey" OR "Turkmen" OR "Turkmenistan" OR "Tuvalu" OR "Uganda" OR "Ukraine" OR "Uzbek" OR "Uzbekistan" OR "Vanuatu" OR "Vietnam" OR "West Bank" OR "Yemen" OR "Zambia" OR "Zimbabwe" OR "Deprived Countries" OR "Deprived Population" OR "Deprived Populations" OR "Developing Countries" OR "Developing Country" OR "Developing Economies" OR "Developing Economy" OR "Developing Nation" OR "Developing Nations" OR "Developing Population" OR "Developing Populations" OR "Developing World" OR "LAMI Countries" OR "LAMI Country" OR "Less Developed Countries" OR "Less Developed Country" OR "Less Developed Economies" OR "Less Developed Nation" OR "Less Developed Nations" OR "Less Developed World" OR "Lesser Developed Countries" OR "Lesser Developed Nations" OR "LMIC" OR "LMICS" OR "Low GDP" OR "Low GNP" OR "Low Gross Domestic" OR "Low Gross National" OR "Low Income Countries" OR "Low Income Country" OR "Low Income Economies" OR "Low Income Economy" OR "Low Income Nations" OR "Low Income Population" OR "Low Income Populations" OR "Lower GDP" OR "lower gross domestic" OR "Lower Income Countries" OR "Lower Income Country" OR "Lower Income Nations" OR "Lower Income Population" OR "Lower Income Populations" OR "Middle Income Countries" OR "Middle Income Country" OR "Middle Income Economies" OR "Middle Income Nation" OR "Middle Income Nations" OR "Middle Income Population" OR "Middle Income Populations" OR "Poor Countries" OR "Poor Country" OR "Poor Economies" OR "Poor Economy" OR "Poor Nation" OR "Poor Nations" OR "Poor Population" OR "Poor Populations" OR "poor world" OR "Poorer Countries" OR "Poorer Economies" OR "Poorer Economy" OR "Poorer Nations" OR "Poorer Population" OR "Poorer Populations" OR "Third World" OR "Transitional Countries" OR "Transitional Country" OR "Transitional Economies" OR "Transitional Economy" OR "Under Developed Countries" OR "Under Developed Country" OR "under developed nations" OR "Under Developed World" OR "Under Served Population" OR "Under Served Populations" OR "Underdeveloped Countries" OR "Underdeveloped Country" OR "underdeveloped economies" OR "underdeveloped nations" OR "underdeveloped population" OR "Underdeveloped World" OR "Underserved Countries" OR "Underserved Nations" OR "Underserved Population" OR "Underserved Populations" )

## Appendix S2: Key information from included documents

| Lead author | Title                                                                                                                                                                                     | Year | Publishing Organization                                                                                                                                                                                     | Type of document | Journal/conference                                     | World Health Organization region | Country     | Type of crisis | Crisis setting     | Thematic areas                       | Interventions provided by CHWs            | CHW cadre                         | Study methods                                   | Key findings                                                                                                                                                                                                                                                                                                                                                                                                                                                                                       |
|-------------|-------------------------------------------------------------------------------------------------------------------------------------------------------------------------------------------|------|-------------------------------------------------------------------------------------------------------------------------------------------------------------------------------------------------------------|------------------|--------------------------------------------------------|----------------------------------|-------------|----------------|--------------------|--------------------------------------|-------------------------------------------|-----------------------------------|-------------------------------------------------|----------------------------------------------------------------------------------------------------------------------------------------------------------------------------------------------------------------------------------------------------------------------------------------------------------------------------------------------------------------------------------------------------------------------------------------------------------------------------------------------------|
| Adam        | Relationship between implementing interpersonal communication and mass education campaigns in emergency settings and use of reproductive healthcare services: evidence from Darfur, Sudan | 2015 | Tokyo Medical and Dental University                                                                                                                                                                         | Journal article  | BMJ Open                                               | Eastern Mediterranean            | Sudan       | Conflict       | Camp               | Reproductive health                  | Home visits and mass education activities | Maternal community health workers | Pre-post surveys, no comparison                 | <ul style="list-style-type: none"> <li>– Health communication and health services not appropriate for displaced persons who may be from different ethnic groups, have different culture.</li> <li>– CHWs used in IDP camp setting to do behavior change interventions for maternal health.</li> <li>– Awareness and use of maternal health services over time.</li> <li>– Significant associations between receiving behavior change interventions and use of maternal health services.</li> </ul> |
| Adam        | The influence of maternal health education on the place of delivery in conflict settings of Darfur, Sudan                                                                                 | 2015 | Tokyo Medical and Dental University, University of Khartoum                                                                                                                                                 | Journal article  | Conflict and Health                                    | Eastern Mediterranean            | Sudan       | Conflict       | Camp               | Maternal health, reproductive health | Health education                          | Maternal health workers           | Household survey                                | <ul style="list-style-type: none"> <li>– Female community members were trained to provide maternal health education and to promote facility delivery among IDP women. Receiving a home visit for maternal health education was statistically significant with place of delivery.</li> </ul>                                                                                                                                                                                                        |
| Ager        | Health service resilience in Yobe state, Nigeria in the context of the Boko Haram insurgency: a systems dynamics analysis using group model building                                      | 2015 | Columbia University, Queen Margaret University, University of the Western Cape, Partnership for Reviving Routine Immunization in Northern Nigeria and Maternal Newborn Child Health, University of Montreal | Journal article  | Conflict and Health                                    | Africa                           | Nigeria     | Conflict       | General population | Not specified                        | Not specified                             | Community health workers          | Qualitative interviews, group model building    | <ul style="list-style-type: none"> <li>– CHWs coordinated with community members to warn health workers when it was not safe to travel to communities.</li> </ul>                                                                                                                                                                                                                                                                                                                                  |
| Ahmadzai    | Scaling up TB DOTS in a fragile state: post-conflict Afghanistan                                                                                                                          | 2008 | Afghanistan Ministry of Public Health, Management Sciences for Health                                                                                                                                       | Journal article  | International Journal of Tuberculosis and Lung Disease | Eastern Mediterranean            | Afghanistan | Conflict       | General population | Infectious diseases                  | Diagnosis and treatment of tuberculosis   | Community health workers          | Analysis of quantitative program data           | <ul style="list-style-type: none"> <li>– CHWs were trained to diagnose and treat TB (with DOTS) in communities. CHWs were seen as an important part of the effort that increased the number of districts implementing DOTS by 600% over four years, increased the number of patients treated for TB by 380% over two years, and increased the cure rate from 59% to 87% over 3 years.</li> </ul>                                                                                                   |
| Ahmed       | Community midwives' acceptability in their communities: A qualitative study from two provinces of Pakistan                                                                                | 2017 | Arabian Gulf University, United Nations Children's Fund, Human Development Programme                                                                                                                        | Journal article  | Midwifery                                              | Eastern Mediterranean            | Pakistan    | Conflict       | General population | Maternal health, newborn health      | Assisted home delivery, newborn care      | Community midwives                | Qualitative interviews, focus group discussions | <ul style="list-style-type: none"> <li>– Insecurity contributed to difficulties in traveling for community midwives.</li> </ul>                                                                                                                                                                                                                                                                                                                                                                    |

|          |                                                                                                                                                         |      |                                                                                                                                                                                             |                 |                                              |                       |             |                     |                    |                                                                    |                                                                         |                              |                                                                     |                                                                                                                                                                                                                                                                                                                                                                                                  |
|----------|---------------------------------------------------------------------------------------------------------------------------------------------------------|------|---------------------------------------------------------------------------------------------------------------------------------------------------------------------------------------------|-----------------|----------------------------------------------|-----------------------|-------------|---------------------|--------------------|--------------------------------------------------------------------|-------------------------------------------------------------------------|------------------------------|---------------------------------------------------------------------|--------------------------------------------------------------------------------------------------------------------------------------------------------------------------------------------------------------------------------------------------------------------------------------------------------------------------------------------------------------------------------------------------|
| Akseer   | Achieving maternal and child health gains in Afghanistan: a Countdown to 2015 country case study                                                        | 2016 | Hospital for Sick Children, London School of Hygiene & Tropical Medicine, United Nations Children's Fund, Afghanistan Ministry of Public Health, Aga Khan University, University of Toronto | Journal article | Lancet Global Health                         | Eastern Mediterranean | Afghanistan | Conflict            | General population | Maternal health, newborn health, child health, reproductive health | Not specified                                                           | Community health workers     | Document review, analysis of quantitative data                      | - Afghanistan has only recently invested heavily in CHWs, so they had not played a role in RMNCH outcomes at the national level in 2016.                                                                                                                                                                                                                                                         |
| Allam    | An Outbreak of Cholera due to Contaminated Water, Medak District, Andhra Pradesh, India, 2013                                                           | 2015 | SHARE India, Hyderabad Directorate of Health, India National Institute of Epidemiology                                                                                                      | Commentary      | Indian Journal of Community Medicine         | South-East Asia       | India       | Disease outbreak    | General population | Infectious diseases                                                | Active case finding                                                     | Community health workers     | Retrospective cohort study, household census                        | - CHWs carried out active case finding during a cholera outbreak.                                                                                                                                                                                                                                                                                                                                |
| Almedom  | Maternal psychosocial well-being in Eritrea: application of participatory methods and tools of investigation and analysis in complex emergency settings | 2003 | Tufts University, Eritrea Ministry of Environment, Water and Land, Eritrea Ministry of Health, Eritrean Relief and Refugee Commission                                                       | Journal article | Bulletin of the World Health Organization    | Africa                | Eritrea     | Conflict            | Camp               | Maternal health, mental health                                     | Assisted home delivery, referral of delivering women to health facility | Traditional birth attendants | Group discussions                                                   | - TBAs were more trusted and were seen as giving more respectful care than health facility workers.<br>- Post-partum support provided by TBAs was seen as supportive of mothers' mental health.                                                                                                                                                                                                  |
| Alonge   | The effect of contracting for health services on the equity of utilization and out-of-pocket health expenditure in rural Afghanistan                    | 2012 | Johns Hopkins University                                                                                                                                                                    | Dissertation    | N/A                                          | Eastern Mediterranean | Afghanistan | Conflict            | General population | Not specified                                                      | Not specified                                                           | Community health workers     | Analysis of household survey, health facility survey, and HMIS data | - Health facilities with more than 10 CHWs compared to those with none were significantly pro-poor.                                                                                                                                                                                                                                                                                              |
| Amthor   | The Use of Home-Based Therapy with Ready-to-Use Therapeutic Food to Treat Malnutrition in a Rural Area during a Food Crisis                             | 2009 | Washington University                                                                                                                                                                       | Journal article | Journal of the American Dietetic Association | Africa                | Malawi      | Nutrition emergency | General population | Nutrition                                                          | Diagnosis of child malnutrition and prescription of RUTF                | Village health aides         | Longitudinal tracking of malnutrition status of children            | - Using CHWs to diagnose and prescribe RUTF for home-based treatment for severely malnourished children was feasible and resulted in high treatment and recovery rates.<br>- The program was rolled-out rapidly, with only 10 days for preparation and training of CHWs.<br>- Besides the initial training of village health aides, no medical personnel were needed to manage the intervention. |
| Anderson | Role of community health workers in trachoma control: Case study from a Somali refugee camp                                                             | 1986 | Institute of Ophthalmology, Save the Children                                                                                                                                               | Journal article | Tropical Doctor                              | Eastern Mediterranean | Somalia     | Conflict            | Camp               | Infectious diseases                                                | Diagnosis and treatment of trachoma, health education                   | Community health workers     | Pre-post household surveys, no comparison                           | - CHWs were trained to diagnose and treat trachoma and provide education on prevention of trachoma.<br>- Before and after surveys showed a statistically significant decrease in active and severe trachoma.                                                                                                                                                                                     |

|          |                                                                                                                                                             |               |                                                                                                                                                                                                           |                 |                                                     |                       |                              |                  |                          |                           |                                                                                                         |                              |                                                                                  |                                                                                                                                                                                                                                                                                                                                                                                               |
|----------|-------------------------------------------------------------------------------------------------------------------------------------------------------------|---------------|-----------------------------------------------------------------------------------------------------------------------------------------------------------------------------------------------------------|-----------------|-----------------------------------------------------|-----------------------|------------------------------|------------------|--------------------------|---------------------------|---------------------------------------------------------------------------------------------------------|------------------------------|----------------------------------------------------------------------------------|-----------------------------------------------------------------------------------------------------------------------------------------------------------------------------------------------------------------------------------------------------------------------------------------------------------------------------------------------------------------------------------------------|
| Anwari   | Implementing people-centred health systems governance in 3 provinces and 11 districts of Afghanistan: a case study                                          | 2015          | Management Sciences for Health, Wardak Provincial Public Health Office, Khost Provincial Public Health Office, Herat Provincial Public Health Office, Afghanistan Ministry of Public Health               | Journal article | Conflict and Health                                 | Eastern Mediterranean | Afghanistan                  | Conflict         | General population       | Not specified             | Not specified                                                                                           | Community health workers     | Pre-post surveys, analysis of quantitative program data, focus group discussions | N/A                                                                                                                                                                                                                                                                                                                                                                                           |
| Ardalan  | Effectiveness of a Primary Health Care Program on Urban and Rural Community Disaster Preparedness, Islamic Republic of Iran: A Community Intervention Trial | 2013          | Iranian National Institute of Health Research, Tehran University of Medical Sciences, Golestan University of Medical Sciences, Kerman University of Medical Sciences, Harvard University, Yale University | Journal article | Disaster Medicine and Public Health Preparedness    | Eastern Mediterranean | Iran                         | Natural disaster | General population       | Disaster preparedness     | Disaster preparedness education                                                                         | Community health workers     | Pre-post household surveys, with comparison                                      | <ul style="list-style-type: none"> <li>– CHWs were used to carry out a community education intervention for disaster awareness and preparedness.</li> <li>– All measures of household awareness and readiness increased significantly in the intervention area compared to the control area over the 6-month study period.</li> </ul>                                                         |
| Balaluka | Community volunteers can improve breastfeeding among children under six months of age in the Democratic Republic of Congo crisis                            | 2012          | Centre de Recherche en Sciences Naturelles de Lwiro, Université Libre de Bruxelles                                                                                                                        | Journal article | International Breastfeeding Journal                 | Africa                | Democratic Republic of Congo | Conflict         | General population       | Newborn health, nutrition | Promotion of exclusive breastfeeding, growth monitoring                                                 | Community volunteers         | Unclear                                                                          | <ul style="list-style-type: none"> <li>– Community volunteers were trained to promote exclusive breastfeeding in an area affected by chronic conflict and insecurity.</li> <li>– The proportion of infants who were exclusively breastfed from birth at 4, 5, and 6 months of age was also significantly higher in the intervention area than in the comparison area.</li> </ul>              |
| Barbera  | Phase IV progress report: "Medicine at our doorstep" January-December 2010                                                                                  | Not specified | International Rescue Committee                                                                                                                                                                            | Report          | N/A                                                 | Africa                | Ivory Coast                  | Conflict         | General population       | Child health              | Treatment of childhood pneumonia, diarrhea, and malaria; bednet distribution; vitamin A supplementation | Community based distributors | Analysis of quantitative program data                                            | <ul style="list-style-type: none"> <li>– Post-election violence and insecurity in Ivory Coast caused stockouts of iCCM drugs. In response, larger stocks were given to CHWs and extra incentives were given to supervisors.</li> <li>– Geographic expansion to the second health district was disrupted by the military and political crisis linked to the presidential elections.</li> </ul> |
| Bass     | Controlled Trial of Psychotherapy for Congolese Survivors of Sexual Violence                                                                                | 2013          | Johns Hopkins Bloomberg School of Public Health, International Rescue Committee, University of Washington, University of Texas                                                                            | Journal article | New England Journal of Medicine                     | Africa                | Democratic Republic of Congo | Conflict         | General population       | Mental health             | Psychosocial support                                                                                    | Psychosocial assistants      | Randomized controlled trial                                                      | <ul style="list-style-type: none"> <li>– CHWs provided psychosocial support to women in areas with high levels of illiteracy and insecurity.</li> <li>– Psychosocial health status of participants improved among those receiving both group and individual therapy, with the largest improvements among those in group therapy.</li> </ul>                                                   |
| Becker   | Psychosocial care for adult and child survivors of the tsunami disaster in India                                                                            | 2007          | Georgetown University                                                                                                                                                                                     | Journal article | Journal of Child and Adolescent Psychiatric Nursing | South-East Asia       | India                        | Natural disaster | General population, camp | Mental health             | Psychosocial support                                                                                    | Community workers, teachers  | Documentation of experience                                                      | <ul style="list-style-type: none"> <li>– Teachers and other community members were trained to provide psychosocial support, through play therapy for children and group therapy for adults.</li> </ul>                                                                                                                                                                                        |



|                |                                                                                                                                                                                      |      |                                                                                                                                                                                                                               |                 |                                                         |                       |                              |                  |                          |                                                                    |                                                                                                                |                                                                   |                                                                    |                                                                                                                                                                                                                                                                                                                                   |
|----------------|--------------------------------------------------------------------------------------------------------------------------------------------------------------------------------------|------|-------------------------------------------------------------------------------------------------------------------------------------------------------------------------------------------------------------------------------|-----------------|---------------------------------------------------------|-----------------------|------------------------------|------------------|--------------------------|--------------------------------------------------------------------|----------------------------------------------------------------------------------------------------------------|-------------------------------------------------------------------|--------------------------------------------------------------------|-----------------------------------------------------------------------------------------------------------------------------------------------------------------------------------------------------------------------------------------------------------------------------------------------------------------------------------|
| Bell           | "Ebola kills generations": Qualitative discussions with Liberian healthcare providers                                                                                                | 2017 | University of Michigan School of Nursing, Africare                                                                                                                                                                            | Journal article | Midwifery                                               | Africa                | Liberia                      | Disease outbreak | General population       | Not specified                                                      | Not specified                                                                                                  | General community health volunteers, traditional birth attendants | Focus group discussions                                            | - During Ebola, CHWs were at increased risk of infection because of their contact with sick people in the community and the lack of safety equipment, such as PPE and non-contact thermometers.                                                                                                                                   |
| Bhadra         | Psychosocial Support for the Children Affected by Communal Violence in Gujarat, India                                                                                                | 2012 | Oxfam India                                                                                                                                                                                                                   | Journal article | International Journal of Applied Psychoanalytic Studies | South-East Asia       | India                        | Conflict         | General population, camp | Mental health                                                      | Psychosocial support                                                                                           | Community volunteers                                              | Documentation of experience                                        | - Community members were trained to provide psychosocial support to children and their caregivers in the aftermath of large-scale communal violence.                                                                                                                                                                              |
| Bhatia         | A social and demographic study of Tibetan refugees in India                                                                                                                          | 2002 | Tibetan Government in Exile, University of Adelaide                                                                                                                                                                           | Journal article | Social Science and Medicine                             | South-East Asia       | India                        | Conflict         | Camp                     | Maternal health, newborn health, child health                      | Community-based surveillance, verbal autopsy                                                                   | Community health workers                                          | Documentation of experience                                        | - CHWs carried out surveillance of births, morbidity, mortality, and coverage of health interventions among the refugee community.                                                                                                                                                                                                |
| Bhutta         | Reproductive, maternal, newborn, and child health in Pakistan: challenges and opportunities                                                                                          | 2013 | Aga Khan University, Health Services Academy, John Snow, Save the Children, National Institute of Population Studies, Jinnah Postgraduate Medical Centre, Pakistan Institute of Medical Sciences, Ziauddin Medical University | Journal article | Lancet                                                  | Eastern Mediterranean | Pakistan                     | Conflict         | General population       | Child health, newborn health, maternal health, reproductive health | Health education, provision of contraceptives, nutritional assessment and education, promotion of immunization | Lady health workers                                               | Retrospective case study                                           | - LHW program is institutionalized and covers 60% of the rural population.<br>- Evaluations have found better health indicators in LHW covered areas.<br>- Key constraints include poor support from health facilities, financial constraints, and political interference.<br>- Polio workers have been targeted by armed actors. |
| Bisimwa        | Nutritional monitoring of preschool-age children by community volunteers during armed conflict in the Democratic Republic of the Congo                                               | 2009 | Centre de Recherche en Sciences Naturelles de Lwiro, Centre Scientifique et Médical de l'Université Libre de Bruxelles                                                                                                        | Journal article | Food and Nutrition Bulletin                             | Africa                | Democratic Republic of Congo | Conflict         | General population       | Nutrition                                                          | Growth monitoring, nutrition education                                                                         | Community volunteers                                              | Documentation of experience, analysis of quantitative program data | - CHWs carried out growth monitoring and nutrition education in their communities in a context of conflict and insecurity.<br>- Nearly 95% of monthly growth monitoring reports were received over a 2-year period.                                                                                                               |
| Bisimwa        | The effectiveness of community volunteers in counting populations and assessing their nutritional vulnerability during armed conflict: District health in D.R. Congo, Central Africa | 2009 | Université libre de Bruxelles, Centre de recherche en sciences naturelles de Lwiro                                                                                                                                            | Journal article | Cahiers Santé                                           | Africa                | Democratic Republic of Congo | Conflict         | General population       | Nutrition                                                          | Community census, nutrition assessment                                                                         | Community volunteers                                              | Documentation of experience                                        | - Community volunteers carried out a household census and nutrition assessment in their communities in a context of conflict and insecurity.                                                                                                                                                                                      |
| Boddam-Whetham | Vouchers in Fragile States: Reducing Barriers to Long-Acting Reversible Contraception in Yemen and Pakistan                                                                          | 2016 | Options Consultancy Services, Marie Stopes Society Pakistan                                                                                                                                                                   | Journal article | Global Health: Science and Practice                     | Eastern Mediterranean | Pakistan, Yemen              | Conflict         | General population       | Reproductive health                                                | Provision of contraceptives                                                                                    | Community midwives                                                | Documentation of experience, analysis of quantitative program data | - Community midwives distributed vouchers for contraceptives.                                                                                                                                                                                                                                                                     |

|             |                                                                                                  |      |                                                                                                                                       |                 |                                                                   |                               |                                      |          |                          |                                                    |                                                                                                    |                          |                                                                                          |                                                                                                                                                                                                                                                                                                                                                                                                                                                                                           |
|-------------|--------------------------------------------------------------------------------------------------|------|---------------------------------------------------------------------------------------------------------------------------------------|-----------------|-------------------------------------------------------------------|-------------------------------|--------------------------------------|----------|--------------------------|----------------------------------------------------|----------------------------------------------------------------------------------------------------|--------------------------|------------------------------------------------------------------------------------------|-------------------------------------------------------------------------------------------------------------------------------------------------------------------------------------------------------------------------------------------------------------------------------------------------------------------------------------------------------------------------------------------------------------------------------------------------------------------------------------------|
| Bowden      | Implementation and utilisation of community-based mortality surveillance: a case study from Chad | 2012 | Imperial College London, Cochrane Medical Education Centre, Médecins Sans Frontières, London School of Hygiene and Tropical Medicine, | Journal article | Conflict and Health                                               | Africa                        | Chad                                 | Conflict | Camp                     | Surveillance                                       | Mortality surveillance                                                                             | Community health workers | Qualitative interviews, document review                                                  | <ul style="list-style-type: none"> <li>- CHWs carried out mortality surveillance in IDP camps.</li> <li>- Using local CHWs may have helped to overcome some of the social, political, economic and cultural barriers to data collection on deaths.</li> <li>- Implementation of the community-based mortality surveillance took several months to initiate, indicating that implementation of community-based surveillance may be too slow to be useful in an acute emergency.</li> </ul> |
| Boyd        | TB control in humanitarian emergencies: Lessons from the Syria displacement crisis               | 2019 | U.S. Centers for Disease Control and Prevention                                                                                       | Journal article | Journal of Clinical Tuberculosis and Other Mycobacterial Diseases | Eastern Mediterranean, Europe | Iraq, Jordan, Lebanon, Syria, Turkey | Conflict | General population, camp | Infectious diseases                                | TB screening and detection, provision of DOTS, monitoring treatment adherence, community awareness | Community health workers | Documentation of experience                                                              | <ul style="list-style-type: none"> <li>- CHWs carried out screening and detection of presumptive TB cases, provision of DOTS, monitored treatment adherence, and community awareness on TB.</li> </ul>                                                                                                                                                                                                                                                                                    |
| Brentlinger | Pregnancy outcomes in El Salvador during the post-war period                                     | 1997 | St. Anne's Hospital, Columbia University College of Physicians and Surgeons                                                           | Journal article | International Journal of Gynecology and Obstetrics                | Americas                      | El Salvador                          | Conflict | General population       | Maternal health, newborn health                    | Assisted home delivery                                                                             | Trained lay midwives     | Household surveys                                                                        | <ul style="list-style-type: none"> <li>- Lay midwives were trained to facilitate home deliveries during civil war.</li> <li>- The project achieved high rates of assisted delivery and the project area had very low rates of delivery complications.</li> </ul>                                                                                                                                                                                                                          |
| Brentlinger | Health sector response to security threats during the civil war in El Salvador                   | 1996 | St. Anne's Hospital                                                                                                                   | Journal article | British Medical Journal                                           | Americas                      | El Salvador                          | Conflict | General population       | Child health, infectious diseases, WASH, first aid | Treatment of pneumonia, diarrhea, malaria, and malnutrition; first aid; WASH promotion             | Health promoters         | Documentation of experience                                                              | <ul style="list-style-type: none"> <li>- There was widespread targeting of health workers, including CHWs during the war in El Salvador.</li> <li>- CHWs were trained to overcome a lack of access to health services through health facilities.</li> <li>- CHWs took several measures to maintain a low profile to reduce the risk of attacks or confiscation of commodities.</li> </ul>                                                                                                 |
| Bristol     | Reconstructing Afghanistan's health system                                                       | 2005 | N/A                                                                                                                                   | Commentary      | The Lancet                                                        | Eastern Mediterranean         | Afghanistan                          | Conflict | General population       | Maternal health, newborn health, child health      | Immunization, health education                                                                     | Community health workers | Documentation of experience                                                              | <ul style="list-style-type: none"> <li>- CHWs were trained to provide basic healthcare services in rural areas.</li> </ul>                                                                                                                                                                                                                                                                                                                                                                |
| Britten     | Health care in Nicaragua                                                                         | 1989 | Health Network of the Nicaragua Solidarity Campaign                                                                                   | Journal article | Medicine and War                                                  | Americas                      | Nicaragua                            | Conflict | General population       | Newborn health, child health                       | Immunization, treatment of diarrhea, health education                                              | Brigadistas              | Documentation of experience                                                              | <ul style="list-style-type: none"> <li>- CHWs carried out childhood immunization in communities, which led to high rates of immunization.</li> <li>- Health workers, including CHWs were targeted for killing by militias.</li> </ul>                                                                                                                                                                                                                                                     |
| Broholm     | Health Effects of the War in Two Rural Communities in Nicaragua                                  | 1989 | Nicaragua Health Study Collaborative                                                                                                  | Journal article | American Journal of Public Health                                 | Americas                      | Nicaragua                            | Conflict | General population       | Not specified                                      | Not specified                                                                                      | Brigadistas              | Survey with comparison, qualitative interviews, focus group discussions, document review | <ul style="list-style-type: none"> <li>- In one area with 20 brigadistas, 10 had been kidnapped and 5 had quit because of threats of violence.</li> </ul>                                                                                                                                                                                                                                                                                                                                 |

|           |                                                                                                                                                             |      |                              |                 |                               |                       |          |                  |                          |                                 |                                                                                                             |                                             |                                                                                                                          |                                                                                                                                                                                                                                                                                                                                    |
|-----------|-------------------------------------------------------------------------------------------------------------------------------------------------------------|------|------------------------------|-----------------|-------------------------------|-----------------------|----------|------------------|--------------------------|---------------------------------|-------------------------------------------------------------------------------------------------------------|---------------------------------------------|--------------------------------------------------------------------------------------------------------------------------|------------------------------------------------------------------------------------------------------------------------------------------------------------------------------------------------------------------------------------------------------------------------------------------------------------------------------------|
| Budosan   | A mixed methods field based assessment to design a mental health intervention after the 2005 earthquake in Mansehra, North-West Frontier Province, Pakistan | 2009 | International Medical Corps, | Journal article | Intervention                  | Eastern Mediterranean | Pakistan | Natural disaster | Camp                     | Mental health                   | Mental health education                                                                                     | Community volunteers                        | Household survey, qualitative interviews, focus group discussions, participant observation, health worker knowledge test | - Community volunteers were trained to provide community education on mental health issues following an earthquake.                                                                                                                                                                                                                |
| Budosan   | Strategy for providing integrated mental health/psychosocial support in post earthquake Haiti                                                               | 2011 | Cordaid                      | Journal article | Intervention                  | Americas              | Haiti    | Natural disaster | General population, camp | Mental health                   | Not specified                                                                                               | Community health workers                    | Household survey, qualitative interviews, focus group discussions, health worker knowledge test                          | - CHWs were trained to provide psychosocial support following the Haiti earthquake.                                                                                                                                                                                                                                                |
| Callister | The Mobile Obstetric Maternal (MOM) Health Workers Project: Improving Maternal and Newborn Health in Eastern Burma                                          | 2012 | Brigham Young University     | Commentary      | Global Health and Nursing     | South-East Asia       | Myanmar  | Conflict         | General population       | Maternal health, newborn health | Not specified                                                                                               | Not specified, traditional birth attendants | Documentation of experience                                                                                              | - Community-based health workers were part of a program to improve maternal and newborn health in conflict-affected areas.<br>- The number of women receiving prenatal care increased from 39% before the project to 72%, and provider attendance at birth increased from 5% to 49%.                                               |
| Campbell  | Promoting community health in Sudan                                                                                                                         | 1999 | GOAL                         | Journal article | Primary Health Care           | Eastern Mediterranean | Sudan    | Conflict         | Camp                     | Nutrition, infectious diseases  | Health education, malnutrition screening and referral, follow-up of clinic defaulters, disease surveillance | Community health promoters                  | Documentation of experience                                                                                              | - Community volunteers carried out health education, nutrition screening and referral, and disease surveillance in IDP camps.<br>- Some volunteers went on strike to protest the lack of salary.                                                                                                                                   |
| Campbell  | Responding to Cyclone Nargis: Key lessons from Merlin's experience                                                                                          | 2008 | Merlin                       | Journal article | Humanitarian Practice Network | South-East Asia       | Myanmar  | Natural disaster | General population       | Maternal health, child health   | Treatment of childhood pneumonia, diarrhea, and malaria; health education; first aid                        | Community health workers                    | Documentation of experience                                                                                              | - After the cyclone hit, CHWs were providing care in their communities before any mobile teams from NGOs were able to access the areas.<br>- CHWs were a crucial part of the emergency relief effort at the community level. They helped carry out needs assessments and distribute aid based on their knowledge of the community. |

|          |                                                                                                                                                                             |      |                                                                                                                                                                                                                                                                                                                                                                                                                                                                                                         |                 |                                 |          |              |                  |                    |                                                    |                                                                               |                             |                                                                                           |                                                                                                                                                                                                                                                                                                                                                                                                                                                                                                                                                                                                                                                                                                                                                                                  |
|----------|-----------------------------------------------------------------------------------------------------------------------------------------------------------------------------|------|---------------------------------------------------------------------------------------------------------------------------------------------------------------------------------------------------------------------------------------------------------------------------------------------------------------------------------------------------------------------------------------------------------------------------------------------------------------------------------------------------------|-----------------|---------------------------------|----------|--------------|------------------|--------------------|----------------------------------------------------|-------------------------------------------------------------------------------|-----------------------------|-------------------------------------------------------------------------------------------|----------------------------------------------------------------------------------------------------------------------------------------------------------------------------------------------------------------------------------------------------------------------------------------------------------------------------------------------------------------------------------------------------------------------------------------------------------------------------------------------------------------------------------------------------------------------------------------------------------------------------------------------------------------------------------------------------------------------------------------------------------------------------------|
| Cancedda | Strengthening Health Systems While Responding to a Health Crisis: Lessons Learned by a Nongovernmental Organization During the Ebola Virus Disease Epidemic in Sierra Leone | 2016 | Partners In Health, Brigham and Women's Hospital, Harvard Medical School, Boston Children's Hospital, Boston University School of Medicine, University of California-San Francisco School of Medicine, Stanford University School of Medicine, Stanford University, Wellbody Alliance, Koidu Government Hospital, Koidu District Health Management Team, Princess Christian Maternity Hospital, Sierra Leone Ministry of Health and Sanitation, Port Loko Government Hospital, University of Washington | Journal article | Journal of Infectious Diseases  | Africa   | Sierra Leone | Disease outbreak | General population | Infectious diseases                                | Infectious disease control, psychosocial support                              | Community health workers    | Documentation of experience                                                               | <ul style="list-style-type: none"> <li>- CHWs conducted over 1.1 million home visits in Ebola-affected communities to identify individuals with symptoms of EVD, referred 357 of those individuals to health facilities, monitored hundreds of family members of patients with Ebola who were under quarantine at home, and delivered educational messages on Ebola to nearly 900,000 Sierra Leoneans.</li> <li>- CHWs were trained to provide psychosocial support to Ebola-affected households and individuals.</li> <li>- CHWs were able to leverage local knowledge, trust, and bonds of solidarity to educate entire villages on the importance of identifying individuals with symptoms of Ebola and seeking early diagnosis and referral to health facilities.</li> </ul> |
| Capps    | Evaluation of a programme to train village health workers in El Salvador                                                                                                    | 1989 | Columbia University, Holy Cross Hospital                                                                                                                                                                                                                                                                                                                                                                                                                                                                | Journal article | Health Policy and Planning      | Americas | El Salvador  | Conflict         | General population | Child health, infectious diseases, WASH, first aid | Treatment of pneumonia, diarrhea, and malnutrition; first aid; WASH promotion | Village health promoters    | Documentation of experience, survey of CHW attitudes and practices, review of CHW reports | <ul style="list-style-type: none"> <li>- CHWs were trained to overcome a lack of access to health services through health facilities.</li> <li>- Challenges in maintaining regular supervision due to distances, insecurity, and fear of gathering in large groups.</li> <li>- CHWs did not feel they received the support they needed to work as effectively as possible.</li> <li>- There was a preference among CHWs and community members for curative services over health promotion activities.</li> </ul>                                                                                                                                                                                                                                                                 |
| Carter   | Treatment Seeking and Ebola Community Care Centers in Sierra Leone: A Qualitative Study                                                                                     | 2017 | Oxfam International                                                                                                                                                                                                                                                                                                                                                                                                                                                                                     | Journal article | Journal of Health Communication | Africa   | Sierra Leone | Disease outbreak | General population | Infectious diseases                                | Community outreach, promotion of care seeking                                 | Community health volunteers | Qualitative interviews, focus group discussions                                           | <ul style="list-style-type: none"> <li>- Community health volunteers served as a link between communities and Ebola community care centers. The CHVs would share information about community care centers and encourage people to seek care and bring back information on family members who were in community care centers.</li> </ul>                                                                                                                                                                                                                                                                                                                                                                                                                                          |

|           |                                                                                                                   |      |                                                                                                                                                                                                           |                 |                                                |                 |              |                     |                    |                                                     |                                                                    |                                    |                                                        |                                                                                                                                                                                                                                                                             |
|-----------|-------------------------------------------------------------------------------------------------------------------|------|-----------------------------------------------------------------------------------------------------------------------------------------------------------------------------------------------------------|-----------------|------------------------------------------------|-----------------|--------------|---------------------|--------------------|-----------------------------------------------------|--------------------------------------------------------------------|------------------------------------|--------------------------------------------------------|-----------------------------------------------------------------------------------------------------------------------------------------------------------------------------------------------------------------------------------------------------------------------------|
| Caulker   | Life goes on: the resilience of maternal primary care during the Ebola outbreak in rural Sierra Leone             | 2017 | Sierra Leone Ministry of Health and Sanitation, University of Toronto, Institute of Tropical Medicine, Makerere University, Baroda Medical College, Dignitas International                                | Journal article | Public Health Action                           | Africa          | Sierra Leone | Disease outbreak    | General population | Infectious diseases                                 | Contact tracing                                                    | Community health workers           | Document review, analysis of quantitative program data | - CHWs were diverted from routine activities to Ebola contact tracing.                                                                                                                                                                                                      |
| Chaiken   | The promise of a community-based approach to managing severe malnutrition: A case study from Ethiopia             | 2006 | Indiana University of Pennsylvania, Save the Children                                                                                                                                                     | Journal article | Food and Nutrition Bulletin                    | Africa          | Ethiopia     | Nutrition emergency | General population | Nutrition                                           | Malnutrition screening, health education                           | Outreach workers                   | Analysis of quantitative program data                  | - Community outreach workers were used to screen for malnutrition and carry out follow-up visits during a nutrition emergency.<br>- High cure rates and low default rates were attributed to the intensive monitoring of children in the community by the outreach workers. |
| Chase     | Building back better? Taking stock of the post-earthquake mental health and psychosocial response in Nepal        | 2018 | SOAS University of London, World Health Organization, Psychbigyaan Network Nepal, Transcultural Psychosocial Organization Nepal, Nepal Ministry of Health and Population                                  | Journal article | International Journal of Mental Health Systems | South-East Asia | Nepal        | Natural disaster    | General population | Mental health                                       | Psychosocial counseling and support                                | Female community health volunteers | Literature review, focus group discussions             | - Pre-existing female community health volunteers were trained to provide psychosocial counseling and support to earthquake survivors in communities.                                                                                                                       |
| Chaudhary | Humanitarian response to reproductive and sexual health needs in a disaster: the Nepal Earthquake 2015 case study | 2017 | Nepal Ministry of Health, United Nations Population Fund, World Health Organization, Deutsche Gesellschaft fuer internationale Zusammenarbeit, Midwifery Society of Nepal, United Nations Children's Fund | Journal article | Reproductive Health Matters                    | South-East Asia | Nepal        | Natural disaster    | General population | Sexual and reproductive health                      | Community mobilization, distribution of items to community members | Female community health volunteers | Literature review                                      | - Female community health volunteers carried out community mobilization and distribution of reproductive health items as part of the earthquake response.                                                                                                                   |
| Chen      | Reproductive health for refugees by refugees in Guinea II: sexually transmitted infections                        | 2008 | London School of Hygiene and Tropical Medicine, Gesellschaft für Technische Zusammenarbeit, Reproductive Health Group                                                                                     | Journal article | Conflict and Health                            | Africa          | Guinea       | Conflict            | Camp               | Sexual and reproductive health, infectious diseases | Provision of contraceptives, health education                      | Lay health workers                 | Survey of men and women                                | - Refugee lay health workers provided contraceptives and health education in refugee camps.                                                                                                                                                                                 |

|           |                                                                                                                                                              |      |                                                                                          |                 |                                                |                       |                 |                  |                          |                                 |                                                                                             |                                                              |                                                 |                                                                                                                                                                                                                                                                                                                                                                                                                                                                                                                                             |
|-----------|--------------------------------------------------------------------------------------------------------------------------------------------------------------|------|------------------------------------------------------------------------------------------|-----------------|------------------------------------------------|-----------------------|-----------------|------------------|--------------------------|---------------------------------|---------------------------------------------------------------------------------------------|--------------------------------------------------------------|-------------------------------------------------|---------------------------------------------------------------------------------------------------------------------------------------------------------------------------------------------------------------------------------------------------------------------------------------------------------------------------------------------------------------------------------------------------------------------------------------------------------------------------------------------------------------------------------------------|
| Chi       | The evolving role of traditional birth attendants in maternal health in post-conflict Africa: A qualitative study of Burundi and northern Uganda             | 2018 | Karolinska Institutet, Peace Research Institute Oslo                                     | Journal article | SAGE Open Medicine                             | Africa                | Burundi, Uganda | Conflict         | General population       | Maternal health                 | Assisted home delivery, newborn care                                                        | Traditional birth attendants                                 | Qualitative interviews, focus group discussions | <ul style="list-style-type: none"> <li>- In response to decreased access to facility-based care during conflict, TBAs were trained and supplied to assist childbirth in communities.</li> <li>- TBAs were able to support deliveries during acute conflict when there was no access to facilities and when communities were displaced.</li> <li>- Some respondents associated increased utilization of TBAs for delivery with high levels of maternal and neonatal mortality and morbidity due to TBAs' low level of competence.</li> </ul> |
| Coleridge | Community Based Rehabilitation in a Complex Emergency: Study of Afghanistan                                                                                  | 2002 | International Labor Organization                                                         | Journal article | Asia Pacific Disability Rehabilitation Journal | Eastern Mediterranean | Afghanistan     | Conflict         | General population       | Injury rehabilitation           | Community mobilization, identification and referral of disabled people, vocational training | Community rehabilitation and development workers, volunteers | Documentation of experience                     | <ul style="list-style-type: none"> <li>- Community rehabilitation and development workers and volunteers carried out community mobilization, identification and referral of disabled people, vocational training in communities.</li> </ul>                                                                                                                                                                                                                                                                                                 |
| Contreras | Community strengthening and mental health system linking after flooding in two informal human settlements in Peru: a model for small-scale disaster response | 2018 | Socios En Salud, Harvard Medical School                                                  | Journal article | Global Mental Health                           | Americas              | Peru            | Natural disaster | General population       | Mental health                   | Screening and referral for depression and domestic violence, community theater              | Community health workers, volunteers                         | Documentation of experience                     | <ul style="list-style-type: none"> <li>- CHWs carried out community-based screening and referral for depression and domestic violence.</li> </ul>                                                                                                                                                                                                                                                                                                                                                                                           |
| Corbeau   | Mission in the Afghan camps                                                                                                                                  | 1989 | Association Internationale Contre La Faim, United Nations High Commissioner for Refugees | Journal article | Revue de l'Infirmiere                          | Eastern Mediterranean | Afghanistan     | Conflict         | Camp                     | Maternal health, newborn health | Assisted home delivery, newborn care                                                        | Female community health workers                              | Documentation of experience                     | <ul style="list-style-type: none"> <li>- Traditional midwives were trained to support deliveries in Afghan refugee camps.</li> <li>- Training methodologies had to be adapted to the conservative traditional norms.</li> </ul>                                                                                                                                                                                                                                                                                                             |
| Corish    | Safe motherhood in a refugee setting                                                                                                                         | 1997 | Not specified                                                                            | Journal article | Safe Motherhood Newsletter                     | Africa                | Kenya           | Conflict         | Camp                     | Maternal health                 | Assisted home delivery, newborn care                                                        | Community health workers, traditional birth attendants       | Documentation of experience                     | <ul style="list-style-type: none"> <li>- Refugee TBAs were trained to assist deliveries in the refugee camp.</li> <li>- Trained TBAs faced harassment and threats by untrained TBAs who felt that the trained TBAs threatened their livelihoods.</li> </ul>                                                                                                                                                                                                                                                                                 |
| Cropley   | The effect of health education interventions on child malaria treatment-seeking practices among mothers in rural refugee villages in Belize, Central America | 2004 | University of New Orleans                                                                | Journal article | Health Promotion International                 | Americas              | Belize          | Not specified    | General population, camp | Child health                    | Treatment of malaria, health education, disease surveillance                                | Voluntary collaborators                                      | Quasi-experimental study                        | <ul style="list-style-type: none"> <li>- Voluntary collaborators provided education on prevention of malaria and importance of care seeking and provided malaria treatment.</li> <li>- Despite high knowledge of availability of malaria treatment by voluntary collaborators, utilization was low.</li> </ul>                                                                                                                                                                                                                              |

|         |                                                                                                                        |      |                                                                                                                                                            |                 |                                                   |                       |              |                  |                    |                                                      |                                                                                                                                                                                             |                                |                                            |                                                                                                                                                                                                                                                                                                                                                                                                                                                                       |
|---------|------------------------------------------------------------------------------------------------------------------------|------|------------------------------------------------------------------------------------------------------------------------------------------------------------|-----------------|---------------------------------------------------|-----------------------|--------------|------------------|--------------------|------------------------------------------------------|---------------------------------------------------------------------------------------------------------------------------------------------------------------------------------------------|--------------------------------|--------------------------------------------|-----------------------------------------------------------------------------------------------------------------------------------------------------------------------------------------------------------------------------------------------------------------------------------------------------------------------------------------------------------------------------------------------------------------------------------------------------------------------|
| Crowe   | A Plan for Community Event-Based Surveillance to Reduce Ebola Transmission — Sierra Leone, 2014–2015                   | 2015 | U.S. Centers for Disease Control and Prevention, International Rescue Committee, Sierra Leone Ministry of Health and Sanitation, World Health Organization | Journal article | Morbidity and Mortality Weekly Report             | Africa                | Sierra Leone | Disease outbreak | General population | Infectious diseases                                  | Community events-based surveillance                                                                                                                                                         | Community health monitors      | Documentation of experience                | <ul style="list-style-type: none"> <li>– Community members were trained to carry out community events-based surveillance for Ebola.</li> <li>– Preliminary assessments indicated that the program had a high level of acceptance by key community leaders, villagers, and the case detection and response team members.</li> </ul>                                                                                                                                    |
| Cutts   | Training Community Health Workers in refugee camps: A case study from Pakistan                                         | 1984 | London School of Hygiene and Tropical Medicine                                                                                                             | Journal article | Disasters                                         | Eastern Mediterranean | Pakistan     | Conflict         | Camp               | Maternal health, child health, infectious diseases   | Health education; screening for TB, malaria, and malnutrition; immunization promotion; first aid; registration of births and deaths                                                         | Community health workers, Dais | Documentation of experience                | <ul style="list-style-type: none"> <li>– CHWs and Dais are trained to provide health education; identifying cases of TB, malaria and malnutrition; immunization promotion; first aid; and registrations of births and deaths in Afghan refugee camps in Pakistan.</li> <li>– Training women was a sensitive issue due to the cultural background.</li> </ul>                                                                                                          |
| D'Agnes | Community-based approach to refugee relief: experiences from Thailand                                                  | 1982 | Community Based Emergency Relief Services                                                                                                                  | Journal article | International Planned Parenthood Medical Bulletin | South-East Asia       | Thailand     | Conflict         | Camp               | Reproductive health                                  | Provision of contraceptives, promotion of family planning                                                                                                                                   | Community volunteers           | Documentation of experience                | <ul style="list-style-type: none"> <li>– Community volunteers provided contraceptives to Cambodian refugees.</li> </ul>                                                                                                                                                                                                                                                                                                                                               |
| Deressa | Community participation in malaria epidemic control in highland areas of southern Oromia, Ethiopia                     | 2005 | Addis Ababa University, Oromia Regional State Health Bureau                                                                                                | Journal article | Ethiopian Journal of Health and Development       | Africa                | Ethiopia     | Disease outbreak | General population | Child health, newborn health, maternal health        | Diagnosis and treatment of uncomplicated malaria, referral of severe malaria cases, community mobilization and health education, environmental management, surveillance, death registration | Village malaria workers        | Document review                            | <ul style="list-style-type: none"> <li>– CHWs were recruited and quickly trained to carry out malaria treatment and prevention activities, as well as surveillance of malaria cases and deaths, during a malaria epidemic.</li> <li>– CHWs were supervised on a weekly basis, which allowed for frequent support, supply of medications, and collection of surveillance reports.</li> <li>– CHWs treated large numbers of people and reported many deaths.</li> </ul> |
| Doherty | Providing Palliative Care in a Humanitarian Crisis Situation: Using Community Health Workers in Rohingya Refugee Camps | 2018 | World Child Cancer and Fasiuddin Khan Research Foundation                                                                                                  | Web blog        | N/A                                               | South-East Asia       | Bangladesh   | Conflict         | Camp               | Palliative care                                      | Palliative care                                                                                                                                                                             | Palliative care assistants     | Documentation of experience                | <ul style="list-style-type: none"> <li>– Palliative care assistants (PCAs) provided basic palliative care to patients with chronic or life-threatening illnesses in their homes.</li> <li>– The PCAs support patients by delivering medications, providing basic nursing care, and monitoring symptoms.</li> <li>– Patients are referred to PCAs from a health center or through active case finding in the community by PCAs.</li> </ul>                             |
| Dudgeon | Birth after Death: Men and Reproduction in Two K'iche' Maya Communities                                                | 2013 | Emory University                                                                                                                                           | Dissertation    | N/A                                               | Americas              | Guatemala    | Conflict         | General population | Reproductive health, maternal health, newborn health | Antenatal care                                                                                                                                                                              | Traditional birth attendants   | Household surveys, participant observation | <ul style="list-style-type: none"> <li>– Prenatal care was provided to the Maya communities after the Guatemalan civil war mainly by TBAs.</li> </ul>                                                                                                                                                                                                                                                                                                                 |

|          |                                                                                                                                                                                     |      |                                                                                                                                                            |                     |                                           |                       |             |                  |                    |                                                    |                                                                                                                                                               |                          |                                                                                                                        |                                                                                                                                                                                                                                                                                                                                                                                                                                                                                                                                                                                                                                                                                                                             |
|----------|-------------------------------------------------------------------------------------------------------------------------------------------------------------------------------------|------|------------------------------------------------------------------------------------------------------------------------------------------------------------|---------------------|-------------------------------------------|-----------------------|-------------|------------------|--------------------|----------------------------------------------------|---------------------------------------------------------------------------------------------------------------------------------------------------------------|--------------------------|------------------------------------------------------------------------------------------------------------------------|-----------------------------------------------------------------------------------------------------------------------------------------------------------------------------------------------------------------------------------------------------------------------------------------------------------------------------------------------------------------------------------------------------------------------------------------------------------------------------------------------------------------------------------------------------------------------------------------------------------------------------------------------------------------------------------------------------------------------------|
| Edmond   | Can community health worker home visiting improve care-seeking and maternal and newborn care practices in fragile states such as Afghanistan? A population-based intervention study | 2018 | United Nations Children's Fund, Afghanistan Ministry of Public Health, Save The Children, Harvard School of Public Health                                  | Journal article     | BMC Medicine                              | Eastern Mediterranean | Afghanistan | Conflict         | General population | Maternal health, newborn health                    | Antenatal care; postnatal care; provision of contraceptives; treatment of pneumonia and diarrhea; health education; reporting pregnancies, births, and deaths | Community health workers | Quasi-experimental study                                                                                               | <ul style="list-style-type: none"> <li>- CHWs were trained to conduct home visits and provide behavior change communication with pregnant or postpartum women.</li> <li>- The intervention resulted in improved care seeking and service utilization for facility delivery.</li> <li>- The levels of conflict and insecurity restricted movement of some CHWs.</li> <li>- Cultural practices limited access to some mothers.</li> <li>- Competing workload priorities and other employment also restricted the time the CHWs could devote to the home visiting program.</li> </ul>                                                                                                                                          |
| Edward   | Toward universal coverage in Afghanistan: A multi-stakeholder assessment of capacity investments in the community health worker system                                              | 2015 | Johns Hopkins University, Management Sciences for Health, Texas Department of State Health Services, Babson College, Afghanistan Ministry of Public Health | Journal article     | Social Science and Medicine               | Eastern Mediterranean | Afghanistan | Conflict         | General population | Child health, maternal health, reproductive health | Treatment of childhood illnesses, provision of contraceptives, health promotion, demand-creation for health services                                          | Community health workers | Survey of health facilities, qualitative interviews, focus group discussions; capacity assessments of CHW health posts | <ul style="list-style-type: none"> <li>- Support to CHWs in terms of training, supervision and supplies were adequate.</li> <li>- Keys to the success of the program were strong community engagement and community support of CHWs, strong MoH leadership on community health, and adapting CHW services to the cultural context.</li> <li>- Lack of transport, weather and security challenges, human resources for supervision, and stock-outs of commodities were key challenges.</li> </ul>                                                                                                                                                                                                                            |
| Fallah   | Interrupting Ebola Transmission in Liberia Through Community-Based Initiatives                                                                                                      | 2016 | Liberia Ministry of Health, United Nations Development Programme, University of Liberia, Yale School of Public Health                                      | Journal article     | Annals of Internal Medicine               | Africa                | Liberia     | Disease outbreak | General population | Infectious diseases                                | Community events-based surveillance                                                                                                                           | Not specified            | Documentation of experience                                                                                            | <ul style="list-style-type: none"> <li>- The initial top-down Ebola response that did not take into account the cultural context was not successful.</li> <li>- In a setting where trust for government is low, but trust for community leaders is high, it was crucial to engage community leaders in the response.</li> <li>- Community leaders recruited community members to be trained on active surveillance.</li> <li>- The community-based surveillance intervention quickly increased the number of Ebola cases detected and isolated.</li> <li>- The success of the intervention in West Point led to its replication in Montserrado County, leading to increased case detection and faster isolation.</li> </ul> |
| Ferreira | Implementing test and start programme in a rural conflict affected area of South Sudan: the experience of Médecins Sans Frontières                                                  | 2017 | Médecins Sans Frontières, South Sudan Ministry of Health                                                                                                   | Conference abstract | Journal of the International AIDS Society | Africa                | South Sudan | Conflict         | General population | Infectious diseases                                | Distribution of treatment for AIDS                                                                                                                            | Community health workers | Analysis of quantitative program data                                                                                  | <ul style="list-style-type: none"> <li>- The contingency plan for an HIV/AIDS program included coordinating with CHWs to distribute 'run-away bags' with 3 months of ART for people needing treatment during periods of conflict.</li> </ul>                                                                                                                                                                                                                                                                                                                                                                                                                                                                                |



|             |                                                                                                   |      |                                                                                                                                                                                                                         |                 |                                       |                 |             |                  |                    |                                                                                 |                                                                                                                                                                |                                                        |                                                                          |                                                                                                                                                                                                                                                                                                                                                                                                                                                                                                  |
|-------------|---------------------------------------------------------------------------------------------------|------|-------------------------------------------------------------------------------------------------------------------------------------------------------------------------------------------------------------------------|-----------------|---------------------------------------|-----------------|-------------|------------------|--------------------|---------------------------------------------------------------------------------|----------------------------------------------------------------------------------------------------------------------------------------------------------------|--------------------------------------------------------|--------------------------------------------------------------------------|--------------------------------------------------------------------------------------------------------------------------------------------------------------------------------------------------------------------------------------------------------------------------------------------------------------------------------------------------------------------------------------------------------------------------------------------------------------------------------------------------|
| Fredricks   | Community Health Workers and Disasters: Lessons Learned from the 2015 Earthquake in Nepal         | 2017 | Massachusetts General Hospital, Harvard University, Dhulikhel Hospital, Kathmandu University                                                                                                                            | Journal article | Prehospital and Disaster Medicine     | South-East Asia | Nepal       | Natural disaster | General population | Maternal health, newborn health, child health, nutrition, family planning, WASH | Treatment of childhood diarrhea and malnutrition, provision of contraceptives, health promotion and education, growth monitoring, first aid                    | Female community health volunteers                     | Qualitative interviews, focus group discussions                          | <ul style="list-style-type: none"> <li>External relief arrived to remote communities weeks after the earthquake.</li> <li>Without external support, CHWs immediately carried out relief activities following the earthquake.</li> <li>CHWs did not receive any emergency preparedness training and did not feel prepared when the disaster happened.</li> <li>Some aid agencies used CHWs to plan and deliver relief services in their communities, but most did not engage the CHWs.</li> </ul> |
| Garfield    | Health education and community participation in mass drug administration for malaria in Nicaragua | 1986 | Columbia University                                                                                                                                                                                                     | Journal article | Social Science and Medicine           | Americas        | Nicaragua   | Conflict         | General population | Infectious diseases                                                             | Treatment of malaria, health education, household registration                                                                                                 | Brigadistas                                            | Documentation of experience                                              | <ul style="list-style-type: none"> <li>Community-based brigadistas supported a mass anti-malarial treatment campaign by conducting a household census, providing health education, and providing malaria treatments.</li> </ul>                                                                                                                                                                                                                                                                  |
| Geiger      | A new medical mission to El Salvador                                                              | 1989 | City University of New York, Harvard Medical School, University of Washington, University of California Los Angeles, Wisconsin Department of Health, Harvard Center for Population Studies, Physicians for Human Rights | Journal article | New England Journal of Medicine       | Americas        | El Salvador | Conflict         | General population | Not specified                                                                   | Simple preventive and curative care (not specified)                                                                                                            | Community health promoters                             | Documentation of experience, qualitative interviews                      | <ul style="list-style-type: none"> <li>Community health promoters provided preventive and curative care in conflict settings.</li> <li>Health workers were faced with a variety of obstacles, including lack of access and security issues.</li> <li>The military limited movement of commodities and interfered with immunization campaigns.</li> </ul>                                                                                                                                         |
| George      | Ongoing Cholera Outbreak — Kenya, 2014–2016                                                       | 2016 | Kenya Ministry of Health, US Centers for Disease Control and Prevention                                                                                                                                                 | Journal article | Morbidity and Mortality Weekly Report | Africa          | Kenya       | Disease outbreak | General population | Infectious diseases                                                             | Health education, distribution of supplies                                                                                                                     | Community health extension workers                     | Documentation of experience                                              | <ul style="list-style-type: none"> <li>Community health extension workers were integral to the promotion of cholera prevention messaging and distribution of supplies.</li> </ul>                                                                                                                                                                                                                                                                                                                |
| Ghebreyesus | Community participation in malaria control in Tigray region Ethiopia                              | 1996 | Ethiopia National Malaria Control Organization, World Health Organization                                                                                                                                               | Journal article | Acta Tropica                          | Africa          | Ethiopia    | Conflict         | General population | Child health, maternal health, nutrition, WASH                                  | Treatment of malaria, environmental management                                                                                                                 | Community health workers, traditional birth attendants | N/A                                                                      | N/A                                                                                                                                                                                                                                                                                                                                                                                                                                                                                              |
| Gilmartin   | South Sudan Boma Health Initiative Costing and Investment Case Analysis                           | 2018 | Management Sciences for Health                                                                                                                                                                                          | Report          | N/A                                   | Africa          | South Sudan | Conflict         | General population | Maternal health, newborn health, child health                                   | Treatment of childhood pneumonia, diarrhea, and malaria; bednet distribution; promotion of ANC and PNC; distribution of contraceptives; community mobilization | Community health workers                               | Document analysis, modeling of costs of scale-up, qualitative interviews | <ul style="list-style-type: none"> <li>In South Sudan, insecurity, along with poor management, high distribution costs, and inadequate storage facilities, led to stockouts of iCCM commodities. This reduces utilisation and damages community and CHW confidence.</li> </ul>                                                                                                                                                                                                                   |

|          |                                                                                                                                                   |      |                                                                                                              |                 |                                              |                       |          |                  |                    |                                                                                 |                                                                                                                                                                                                                                                                                                                                                                    |                                                                                |                                                                    |                                                                                                                                                                                                                                                                                                                                                                                                                                                                                                                                                                                                                                                                                                                                                                                                             |
|----------|---------------------------------------------------------------------------------------------------------------------------------------------------|------|--------------------------------------------------------------------------------------------------------------|-----------------|----------------------------------------------|-----------------------|----------|------------------|--------------------|---------------------------------------------------------------------------------|--------------------------------------------------------------------------------------------------------------------------------------------------------------------------------------------------------------------------------------------------------------------------------------------------------------------------------------------------------------------|--------------------------------------------------------------------------------|--------------------------------------------------------------------|-------------------------------------------------------------------------------------------------------------------------------------------------------------------------------------------------------------------------------------------------------------------------------------------------------------------------------------------------------------------------------------------------------------------------------------------------------------------------------------------------------------------------------------------------------------------------------------------------------------------------------------------------------------------------------------------------------------------------------------------------------------------------------------------------------------|
| Gopalan  | Maternal and neonatal service usage and determinants in fragile and conflict-affected situations: a systematic review of Asia and the Middle-East | 2017 | London School of Hygiene and Tropical Medicine, The World Bank                                               | Journal article | BMC Women's Health                           | Various               | Various  | Conflict         | General population | Maternal health, newborn health                                                 | Assisted home delivery                                                                                                                                                                                                                                                                                                                                             | Community health workers, traditional birth attendants                         | Literature review                                                  | <ul style="list-style-type: none"> <li>- TBAs provided maternal and neonatal health services and provided assistance in deliveries in numerous countries within conflict settings.</li> <li>- Presence of a female TBA or CHW increased the possibility of receiving skilled birth attendance.</li> </ul>                                                                                                                                                                                                                                                                                                                                                                                                                                                                                                   |
| Grainger | Providing safe motherhood services to underserved and neglected populations in Yemen: the case for vouchers                                       | 2017 | Yemen Reproductive Health Programme, Yemen Reproductive Health Voucher Programme, Marie Stopes International | Journal article | Journal of International Humanitarian Action | Eastern Mediterranean | Yemen    | Conflict         | General population | Maternal health, newborn health                                                 | Distribution of vouchers                                                                                                                                                                                                                                                                                                                                           | Community midwives                                                             | Documentation of experience, analysis of quantitative program data | <ul style="list-style-type: none"> <li>- Community midwives were utilized to distribute vouchers for maternal and newborn health services.</li> </ul>                                                                                                                                                                                                                                                                                                                                                                                                                                                                                                                                                                                                                                                       |
| Gulzar   | Role of community health nurse in earthquake affected areas                                                                                       | 2012 | Aga Khan University School of Nursing and Midwifery, The Aman Foundation                                     | Journal article | Journal of Pakistan Medical Association      | Eastern Mediterranean | Pakistan | Natural disaster | General population | Not specified                                                                   | Curative care (not specified), health education                                                                                                                                                                                                                                                                                                                    | Community health nurses, lady health visitors, community health workers        | Documentation of experience                                        | <ul style="list-style-type: none"> <li>- Community-based health workers were trained to provide curative care and health promotion activities following an earthquake.</li> </ul>                                                                                                                                                                                                                                                                                                                                                                                                                                                                                                                                                                                                                           |
| Gupta    | Importance of surveillance for early detection of a cholera outbreak                                                                              | 1993 | National Institute of Cholera and Enteric Diseases                                                           | Journal article | Journal of Communicable Diseases             | South-East Asia       | India    | Disease outbreak | General population | Infectious diseases                                                             | Treatment of diarrhea, health education, disease surveillance                                                                                                                                                                                                                                                                                                      | Village health workers                                                         | Documentation of experience                                        | <ul style="list-style-type: none"> <li>- VHWs were trained to prepare ORS and recognize signs of dehydration.</li> <li>- A cholera outbreak was detected early due to an ongoing surveillance system through VHWs.</li> </ul>                                                                                                                                                                                                                                                                                                                                                                                                                                                                                                                                                                               |
| Gyo      | Humanitarian struggles in Burma's conflict zones                                                                                                  | 2017 | Back Pack Health Worker Team                                                                                 | Journal article | Special Operations Medical Journal           | South-East Asia       | Myanmar  | Conflict         | General population | Maternal health, newborn health, child health, family planning, nutrition, WASH | Treatment of pneumonia, diarrhea, malaria, helminth infection, and anemia; trauma care; assisted home delivery; antenatal care; postnatal care; birth registration; contraceptive distribution; health education; installation of latrines and water systems; distribution of personal hygiene kits; distribution of nutritional supplements; disease surveillance | Community health workers, traditional birth attendants, village health workers | Documentation of experience                                        | <ul style="list-style-type: none"> <li>- A flexible system with mobile CHWs who are supported from outside the country, in addition to local volunteer health workers and TBAs has been able to provide continuity of health services in conflict-affected areas.</li> <li>- The services provided become more limited as the intensity of conflict in an area increases.</li> <li>- CHWs are able to move with communities when there is population displacement.</li> <li>- Mobile CHWs face a number of security risks, including violence by armed forces, landmines, and adverse weather. CHWs' local knowledge as members of communities they serve helps to mitigate the risk.</li> <li>- The program operates with infrequent supervision and re-supply of commodities (every 6 months).</li> </ul> |

|          |                                                                                                                                  |      |                                                |                 |                                         |                       |             |          |                    |                 |                                                                                                                                                      |                                  |                             |                                                                                                                                                                                                                                                                                                                                                                                                                                                                                                                                                                                                                                                                                                                                                                                                                                                                                                                                                                                                     |
|----------|----------------------------------------------------------------------------------------------------------------------------------|------|------------------------------------------------|-----------------|-----------------------------------------|-----------------------|-------------|----------|--------------------|-----------------|------------------------------------------------------------------------------------------------------------------------------------------------------|----------------------------------|-----------------------------|-----------------------------------------------------------------------------------------------------------------------------------------------------------------------------------------------------------------------------------------------------------------------------------------------------------------------------------------------------------------------------------------------------------------------------------------------------------------------------------------------------------------------------------------------------------------------------------------------------------------------------------------------------------------------------------------------------------------------------------------------------------------------------------------------------------------------------------------------------------------------------------------------------------------------------------------------------------------------------------------------------|
| Habboush | The motivational factors for Community Health Workers (CHWs) in the Syrian conflict context                                      | 2018 | University of Birmingham                       | Dissertation    | N/A                                     | Eastern Mediterranean | Syria       | Conflict | General population | Not specified   | Not specified                                                                                                                                        | Community health workers         | Qualitative interviews      | <ul style="list-style-type: none"> <li>– Respondents reported that: 1) recruiting CHWs from their home communities improved trust from community members and CHW motivation, 2) highly qualified professionals recruited as CHWs were more likely to leave the position for an alternative job, 3) conducting trainings was challenging in the conflict setting, 4) availability of supplies was an important factor affecting the motivation of CHWs.</li> </ul>                                                                                                                                                                                                                                                                                                                                                                                                                                                                                                                                   |
| Hadi     | Raising institutional delivery in war-torn communities: Experience of BRAC in Afghanistan                                        | 2007 | Bangladesh Rural Advancement Committee         | Journal article | Asia Pacific Journal of Family Medicine | Eastern Mediterranean | Afghanistan | Conflict | General population | Maternal health | Health education, promotion of antenatal care, treatment of common childhood illnesses, promotion of facility delivery, promotion of family planning | Community health workers         | Pre-post household surveys  | <ul style="list-style-type: none"> <li>– Male CHWs were tasked with raising awareness among men and community leaders regarding the needs of reproductive health services, immunization, and family planning.</li> <li>– Female CHWs were trained to raise health awareness among women, identify pregnant women and motivate them to receive antenatal care services, identify sick children, provide treatment of common illnesses, promote the benefits of having institutional delivery and refer complicated cases to the nearby clinics or hospitals.</li> <li>– CHWs reached 95.5% of pregnant women in 2 years, up from 40.3%.</li> <li>– The proportion of pregnant women who received antenatal care rose from 37.3% to 91.2%.</li> <li>– CHWs were also responsible for calling an ambulance in difficult pregnancy cases.</li> <li>– CHWs also served as social marketing agents, selling health products such as ORS, iodized salt, safe delivery kits, and contraceptives.</li> </ul> |
| Hanscom  | Treating Survivors of War Trauma and Torture                                                                                     | 2001 | Advocates for Survivors of Torture and Trauma  | Journal article | American Psychologist                   | Americas              | Guatemala   | Conflict | General population | Mental health   | Psychosocial support                                                                                                                                 | Lay counselors, midwives         | Documentation of experience | <ul style="list-style-type: none"> <li>– Lay counselors and midwives were trained to provide psychosocial support to survivors of human rights abuses.</li> </ul>                                                                                                                                                                                                                                                                                                                                                                                                                                                                                                                                                                                                                                                                                                                                                                                                                                   |
| Harrison | 'Against all odds': UNHCR's mental health and psychosocial support programme for Iraqi refugees and internally displaced Syrians | 2013 | United Nations High Commissioner for Refugees, | Journal article | Intervention                            | Eastern Mediterranean | Syria       | Conflict | Camp               | Mental health   | Psychosocial support                                                                                                                                 | Psychosocial outreach volunteers | Documentation of experience | <ul style="list-style-type: none"> <li>– Psychosocial outreach volunteers were a part of a program to help improve the psychosocial wellbeing and mental health of vulnerable refugees and Syrians affected by conflict.</li> <li>– A pre-existing program for Iraqi refugees in Syria was expanded to support Syrians as conflict worsened in Syria.</li> <li>– Outreach volunteers also provided social, recreational, educational and livelihood activities.</li> <li>– Security concerns limited the access of outreach volunteers.</li> </ul>                                                                                                                                                                                                                                                                                                                                                                                                                                                  |

|              |                                                                                                                              |      |                                                                                                                                                                                                                |                 |                                           |                       |                              |          |                    |                               |                                                           |                                  |                                                                            |                                                                                                                                                                                                                                                                                                                                                                                                                                                                               |
|--------------|------------------------------------------------------------------------------------------------------------------------------|------|----------------------------------------------------------------------------------------------------------------------------------------------------------------------------------------------------------------|-----------------|-------------------------------------------|-----------------------|------------------------------|----------|--------------------|-------------------------------|-----------------------------------------------------------|----------------------------------|----------------------------------------------------------------------------|-------------------------------------------------------------------------------------------------------------------------------------------------------------------------------------------------------------------------------------------------------------------------------------------------------------------------------------------------------------------------------------------------------------------------------------------------------------------------------|
| Hassan       | Personal reflections on a psychosocial community outreach programme and centre in Damascus, Syria                            | 2013 | United Nations High Commissioner for Refugees                                                                                                                                                                  | Journal article | Intervention                              | Eastern Mediterranean | Syria                        | Conflict | Camp               | Mental health                 | Psychosocial support                                      | Psychosocial outreach volunteers | Documentation of experience                                                | <ul style="list-style-type: none"> <li>– Psychosocial outreach volunteers served as a connection between the community and the non-governmental organization.</li> <li>– Volunteers faced cultural barriers as not all families accepted volunteers in their homes.</li> </ul>                                                                                                                                                                                                |
| Hawkes       | Use and limitations of malaria rapid diagnostic testing by community health workers in war-torn Democratic Republic of Congo | 2009 | University of Toronto, Hospital for Sick Children, Institut Supérieur des Techniques Médicales de Kisangani, HEAL Africa                                                                                       | Journal article | Malaria Journal                           | Africa                | Democratic Republic of Congo | Conflict | General population | Child health                  | Treatment of malaria                                      | Community health workers         | Prospective cohort study, satisfaction questionnaire and decision analysis | <ul style="list-style-type: none"> <li>– It was feasible to train and deploy CHWs to use RDTs to diagnose malaria in an insecure setting.</li> </ul>                                                                                                                                                                                                                                                                                                                          |
| Heggenhougen | Will primary health care efforts be allowed to succeed?                                                                      | 1984 | London School of Hygiene and Tropical Medicine                                                                                                                                                                 | Journal article | Social Science and Medicine               | Americas              | Guatemala                    | Conflict | General population | Maternal health, child health | Not specified                                             | Promotores de salud              | Documentation of experience                                                | <ul style="list-style-type: none"> <li>– In Guatemala, many CHWs and members of their families were targeted and killed.</li> <li>– Community members said they trusted the village health workers from their communities and understood the treatments since they were communicated to them in a way they could understand.</li> </ul>                                                                                                                                       |
| Howard       | Reproductive health services for refugees by refugees in Guinea I: family planning                                           | 2008 | London School of Hygiene and Tropical Medicine, Reproductive Health Group, Gesellschaft für Technische Zusammenarbeit                                                                                          | Journal article | Conflict and Health                       | Africa                | Guinea                       | Conflict | Camp               | Reproductive health           | Provision of contraceptives, health education             | Lay health workers               | Survey of men and women                                                    | <ul style="list-style-type: none"> <li>– Refugee lay health workers provided contraceptives and health education in refugee camps</li> </ul>                                                                                                                                                                                                                                                                                                                                  |
| Howard       | Reproductive health for refugees by refugees in Guinea III: maternal health                                                  | 2011 | London School of Hygiene and Tropical Medicine, Reproductive Health Group, Gesellschaft für Technische Zusammenarbeit, Institute of Tropical Medicine and International Health, Institute of Tropical Medicine | Journal article | Conflict and Health                       | Africa                | Guinea                       | Conflict | Camp               | Maternal health               | Provision of contraceptives, health education             | Lay health workers               | Survey of men and women                                                    | <ul style="list-style-type: none"> <li>– Refugee lay health workers provided contraceptives and health education in refugee camps</li> </ul>                                                                                                                                                                                                                                                                                                                                  |
| Huber        | Achieving success with family planning in rural Afghanistan                                                                  | 2010 | Management Sciences for Health, United Nations Development Programme, STEP Health and Development Organization                                                                                                 | Journal article | Bulletin of the World Health Organization | Eastern Mediterranean | Afghanistan                  | Conflict | General population | Reproductive health           | Provision of contraceptives, promotion of family planning | Community health workers         | Pre-post LQAS household surveys                                            | <ul style="list-style-type: none"> <li>– CHWs provided injectable contraceptives, pills, and condoms in the community.</li> <li>– The contraceptive prevalence rate increased by 24–27% in 8 months in the project areas.</li> <li>– Meetings with religious and other community leaders, including health committees, were important for developing trust and obtaining acceptance of innovations, such as permitting CHWs to initiate injectable contraceptives.</li> </ul> |

|                                                                  |                                                                                                                            |      |                                                                                            |                  |                                                |                                        |                              |                            |                    |                                               |                                                                                                                                                          |                                                     |                                                                                                       |                                                                                                                                                                                                                                                                                                                                                                                                                                                                                                                 |
|------------------------------------------------------------------|----------------------------------------------------------------------------------------------------------------------------|------|--------------------------------------------------------------------------------------------|------------------|------------------------------------------------|----------------------------------------|------------------------------|----------------------------|--------------------|-----------------------------------------------|----------------------------------------------------------------------------------------------------------------------------------------------------------|-----------------------------------------------------|-------------------------------------------------------------------------------------------------------|-----------------------------------------------------------------------------------------------------------------------------------------------------------------------------------------------------------------------------------------------------------------------------------------------------------------------------------------------------------------------------------------------------------------------------------------------------------------------------------------------------------------|
| Husum                                                            | Training pre-hospital trauma care in low-income countries: the 'Village University' experience                             | 2009 | University Hospital of Northern Norway, Hammerfest Hospital                                | Journal article  | Medical Teacher                                | Eastern Mediterranean, Western Pacific | Iraq, Cambodia               | Conflict                   | General population | Trauma                                        | Trauma care                                                                                                                                              | Village first responders                            | Analysis of patient medical records, patient survey                                                   | <ul style="list-style-type: none"> <li>- Village first responders were trained to provide emergency trauma care for victims of landmines in communities.</li> <li>- The mortality rate for landmine victims in the program areas was 21.2%, down from a pre-intervention mortality rate estimated of 40%.</li> </ul>                                                                                                                                                                                            |
| Hynes                                                            | Reproductive health indicators and outcomes among refugee and internally displaced persons in postemergency phase camps    | 2002 | U.S. Centers for Disease Control and Prevention, Johns Hopkins School of Public Health     | Journal article  | Journal of the American Medical Association    | Various                                | Various                      | Conflict                   | Camp               | Reproductive health                           | Not specified                                                                                                                                            | Community health workers                            | Analysis of survey data, analysis of routine program data, qualitative interviews                     | <ul style="list-style-type: none"> <li>- Camps with more CHWs had a lower percentage of newborns with low birth weight.</li> </ul>                                                                                                                                                                                                                                                                                                                                                                              |
| International Federation of Red Cross and Red Crescent Societies | Reproductive, maternal, newborn and child health today: Overview and implementation analysis                               | 2014 | International Federation of the Red Cross and Red Crescent Societies                       | Report           | N/A                                            | Eastern Mediterranean, Americas        | Afghanistan, Haiti, Somalia  | Conflict, natural disaster | General population | Maternal health, newborn health, child health | Treatment of childhood pneumonia, diarrhea, and malaria; malnutrition screening; health education; screening and referral of pregnant women and newborns | Red Cross/Red Crescent volunteers, health promoters | Document analysis                                                                                     | <ul style="list-style-type: none"> <li>- In Afghanistan, recruitment of female volunteers and female trainers to train female volunteers increased access to health services for women.</li> <li>- In Haiti, most Red Cross volunteers ceased their activities following the earthquake.</li> <li>- In Somalia, Red Crescent has stopped immunization activities for several years because the militant group in the area refused to allow house-to-house visits or mass public campaign activities.</li> </ul> |
| International Federation of Red Cross and Red Crescent Societies | CBHFA Asia Pacific Workshop- Lessons Learnt and Monitoring and Evaluation                                                  | 2010 | International Federation of the Red Cross and Red Crescent Societies                       | Conference paper | N/A                                            | South-East Asia                        | Various                      | Not specified              | Not specified      | Not specified                                 | Not specified                                                                                                                                            | Red Cross/Red Crescent volunteers                   | Summary of presentations and discussion                                                               | <ul style="list-style-type: none"> <li>- IFRC review of experiences found that volunteer protection needs to be included in the volunteer training. They should also be able to provide psychosocial support to volunteers who experience traumatic situations. They also offer volunteer insurance through IFRC.</li> </ul>                                                                                                                                                                                    |
| International Rescue Committee                                   | Enabling treatment of severe acute malnutrition in the community: Study of a simplified algorithm and tools in South Sudan | 2018 | International Rescue Committee                                                             | Report           | N/A                                            | Africa                                 | South Sudan                  | Conflict                   | General population | Child health                                  | Treatment of childhood malnutrition                                                                                                                      | Community based distributors                        | Direct observation of case management, qualitative interviews, focus group discussions, cost analysis | <ul style="list-style-type: none"> <li>- Special tools for low-literacy CHWs to diagnose and treat childhood malnutrition in a setting of insecurity. The CHWs showed high levels of accuracy in treating malnourished children with these tools.</li> </ul>                                                                                                                                                                                                                                                    |
| Ikram                                                            | Communicable disease control in Afghanistan                                                                                | 2013 | US Agency for International Development, World Health Organization, Malaysian Armed Forces | Journal article  | Global Public Health                           | Eastern Mediterranean                  | Afghanistan                  | Conflict                   | General population | Infectious diseases                           | Active case finding, DOTS for TB, health education                                                                                                       | Community health workers                            | Documentation of experience, analysis of quantitative program data, qualitative interviews            | <ul style="list-style-type: none"> <li>- CHWs supported the national TB program through active case finding, provision of DOTS, and health education.</li> </ul>                                                                                                                                                                                                                                                                                                                                                |
| Imaja                                                            | A design of a mobile health intervention for the prevention and treatment of Cholera in South Kivu in DRC                  | 2017 | University of KwaZulu-Natal                                                                | Conference paper | IEEE Global Humanitarian Technology Conference | Africa                                 | Democratic Republic of Congo | Disease outbreak           | General population | Infectious diseases                           | Health education, disease surveillance                                                                                                                   | Community health workers                            | Documentation of experience                                                                           | <ul style="list-style-type: none"> <li>- CHWs provided health education on cholera prevention and conduct surveillance for cholera cases.</li> </ul>                                                                                                                                                                                                                                                                                                                                                            |

|           |                                                                                                                                    |      |                                                                                                                                           |                 |                                                                    |                 |             |                               |                          |                     |                                                                                                                      |                              |                                              |                                                                                                                                                                                                                                                                                                                                                                                                                                                                                                |
|-----------|------------------------------------------------------------------------------------------------------------------------------------|------|-------------------------------------------------------------------------------------------------------------------------------------------|-----------------|--------------------------------------------------------------------|-----------------|-------------|-------------------------------|--------------------------|---------------------|----------------------------------------------------------------------------------------------------------------------|------------------------------|----------------------------------------------|------------------------------------------------------------------------------------------------------------------------------------------------------------------------------------------------------------------------------------------------------------------------------------------------------------------------------------------------------------------------------------------------------------------------------------------------------------------------------------------------|
| Jackson   | War and community health in the Philippines                                                                                        | 1989 | Christian Aid Asia/Pacific                                                                                                                | Journal article | Health Visitor                                                     | Western Pacific | Philippines | Conflict                      | General population       | Child health        | Treatment of infectious diseases                                                                                     | Community health workers     | Documentation of experience                  | <ul style="list-style-type: none"> <li>- CHWs were harassed and targeted for violence because of perceived political affiliations.</li> <li>- CHWs often used traditional or homemade medicines to increase community self-reliance and to reduce costs in communities that were persecuted by the government.</li> </ul>                                                                                                                                                                      |
| Janneck   | Human Resources in Humanitarian Health Working Group Report                                                                        | 2009 | Harvard School of Public Health, The George Washington University, Boston University, Albert Einstein College of Medicine                 | Journal article | Prehospital and Disaster Medicine                                  | Various         | Various     | Conflict, natural disaster    | Not specified            | Not specified       | Not specified                                                                                                        | Community health workers     | Documentation of experience                  | <ul style="list-style-type: none"> <li>- Involving CHWs in service and health delivery in humanitarian settings can extend the reach of healthcare and improve recruitment, retention and local capacity.</li> <li>- CHWs need to be properly compensated to alleviate personal and financial stress.</li> </ul>                                                                                                                                                                               |
| Jayatissa | Community-based management of severe and moderate acute malnutrition during emergencies in Sri Lanka: Challenges of implementation | 2012 | Sri Lanka Ministry of Health, United Nations Children's Fund                                                                              | Journal article | Food and Nutrition Bulletin                                        | South-East Asia | Sri Lanka   | Conflict, nutrition emergency | General population, camp | Nutrition           | Community mobilization                                                                                               | Health volunteers            | Pre-post nutrition surveys                   | <ul style="list-style-type: none"> <li>- Community volunteers were used for community mobilization for a community nutrition campaign during a nutrition emergency.</li> </ul>                                                                                                                                                                                                                                                                                                                 |
| Jones     | Rebuilding people-centred maternal health services in post-Ebola Liberia through participatory action research                     | 2018 | International Rescue Committee, London School of Hygiene and Tropical Medicine, Redemption Hospital, Training and Research Support Centre | Journal article | Global Public Health                                               | Africa          | Liberia     | Disease outbreak              | General population       | Maternal health     | Promotion of facility delivery, assisted home delivery                                                               | Trained traditional midwives | Group discussions, surveys of key informants | <ul style="list-style-type: none"> <li>- During the Ebola outbreak, TTMs' role shifted from promotion of facility delivery to attending deliveries to fill the gaps in delivery care.</li> <li>- The TTMs and TBAs were the first points of care for pregnant and delivering women, carrying out most deliveries and continuing to do so even after the Ebola epidemic.</li> <li>- The TTMs and TBAs expressed their anger at not being recognized for providing care during Ebola.</li> </ul> |
| Joseph    | Tungiasis in rural Haiti: a community-based response                                                                               | 2006 | Brigham and Women's Hospital, Zanmi Lasante, Partners in Health                                                                           | Journal article | Transactions of the Royal Society of Tropical Medicine and Hygiene | Americas        | Haiti       | Disease outbreak              | General population       | Infectious diseases | Immunization, provision of DOTS for TB, DOT for AIDS, disease surveillance, treatment of tungiasis, health education | Community health workers     | Documentation of experience                  | <ul style="list-style-type: none"> <li>- CHWs were the first to report an outbreak of tungiasis to clinic staff.</li> <li>- CHWs informed the community about the disease and provided treatment.</li> </ul>                                                                                                                                                                                                                                                                                   |
| Kasi      | A Decade of Disasters: Lessons from the Indian Experience                                                                          | 2007 | National Institute of Mental Health and Neuro Sciences, American Red Cross, East Tennessee State University                               | Journal article | Southern Medical Journal                                           | South-East Asia | India       | Conflict, natural disaster    | General population       | Mental health       | Psychosocial support                                                                                                 | Community level workers      | Documentation of experience                  | <ul style="list-style-type: none"> <li>- Community level workers were trained to respond to the psychosocial needs of the survivors of disasters.</li> </ul>                                                                                                                                                                                                                                                                                                                                   |

|        |                                                                                                                                                                                                                                     |      |                                                                                                                                                                                  |                 |                                            |                       |             |          |                    |                                               |                                                                                                                                          |                                               |                                                                     |                                                                                                                                                                                                                                                                                                                                                                                                                                                                                                                                                |
|--------|-------------------------------------------------------------------------------------------------------------------------------------------------------------------------------------------------------------------------------------|------|----------------------------------------------------------------------------------------------------------------------------------------------------------------------------------|-----------------|--------------------------------------------|-----------------------|-------------|----------|--------------------|-----------------------------------------------|------------------------------------------------------------------------------------------------------------------------------------------|-----------------------------------------------|---------------------------------------------------------------------|------------------------------------------------------------------------------------------------------------------------------------------------------------------------------------------------------------------------------------------------------------------------------------------------------------------------------------------------------------------------------------------------------------------------------------------------------------------------------------------------------------------------------------------------|
| Keller | Evaluative Research in a Refugee Camp: The Effectiveness of Community Health Workers in Khao I Dang - Holding Center, Thailand                                                                                                      | 1988 | Not specified                                                                                                                                                                    | Journal article | Disasters                                  | South-East Asia       | Thailand    | Conflict | Camp               | Not specified                                 | Case finding, simple curative treatments, immunization, antenatal care, postnatal care, family planning, health education                | Community health workers                      | Documentation of experience                                         | <ul style="list-style-type: none"> <li>- Community members preferred older female CHWs rather than the young male CHWs that were hired. Men and young people were not culturally acceptable to perform the role.</li> <li>- Class conflicts were identified between educated, upper-class CHWs and the uneducated camp majority.</li> <li>- Poor community acceptance of the CHWs impaired their effectiveness, and was attributed to age, sex and socioeconomic barriers.</li> </ul>                                                          |
| Khan   | Evaluating feasibility and acceptability of a local psycho-educational intervention for pregnant women with common mental problems affected by armed conflict in Swat, Pakistan: A parallel randomized controlled feasibility trial | 2017 | Khyber Medical University, University of Liverpool, Human Development Research Foundation                                                                                        | Journal article | International Journal of Social Psychiatry | Eastern Mediterranean | Pakistan    | Conflict | General population | Mental health, maternal health                | Psychosocial support                                                                                                                     | Lady health workers                           | Randomized controlled trial, qualitative interviews                 | <ul style="list-style-type: none"> <li>- LHWs were the preferred source of information on women's health concerns.</li> <li>- LHWs were able to deliver the psychosocial intervention, and they expressed satisfaction at understanding more about the mental health needs of pregnant women.</li> <li>- The intervention was acceptable to the community and as to the LHWs who delivered it.</li> <li>- Psychological distress was lower in the intervention than in the control arm, but this was not statistically significant.</li> </ul> |
| Khan   | Newborn survival in Pakistan: a decade of change and future implications                                                                                                                                                            | 2012 | Save the Children, Pakistan Institute of Medical Sciences, Health Services Academy, John Snow, Inc., The Aga Khan University                                                     | Journal article | Health Policy and Planning                 | Eastern Mediterranean | Pakistan    | Conflict | General population | Maternal health, newborn health, child health | Maternal and child health services (not specified), preventative services, (not specified) referral and link to skilled birth attendants | Lady health workers, community health workers | Literature review                                                   | <ul style="list-style-type: none"> <li>- The LHWs played a key role following the earthquake of 2005 with provision of family health services.</li> <li>- A number of important research studies demonstrated that simple community-based interventions increased newborn survival and improved newborn care practices.</li> <li>- LHWs helped increase immunization coverage for tetanus elimination.</li> <li>- LHWs had shortcomings in terms of knowledge and skills, as well as absenteeism and lack of equipment.</li> </ul>             |
| Kim    | Evaluation of an Interactive Electronic Health Education Tool in Rural Afghanistan                                                                                                                                                  | 2008 | VA Boston Healthcare System, Brigham and Women's Hospital and Harvard Medical School, International Medical Corps, Johns Hopkins University, F. Edward Hébert School of Medicine | Journal article | Prehospital and Disaster Medicine          | Eastern Mediterranean | Afghanistan | Conflict | General population | Not specified                                 | Health education                                                                                                                         | Community health workers                      | Pre-post household surveys                                          | <ul style="list-style-type: none"> <li>- Both an interactive electronic health education tool and health education by CHWs were effective in increasing community health knowledge.</li> <li>- CHWs were preferred by Afghans because of the value placed on personal contact and interaction.</li> </ul>                                                                                                                                                                                                                                      |
| Kodish | Understanding low usage of micronutrient powder in the Kakuma Refugee Camp, Kenya: Findings from a qualitative study                                                                                                                | 2011 | Johns Hopkins Bloomberg School of Public Health, Sight and Life, World Food Programme, Tufts University                                                                          | Journal article | Food and Nutrition Bulletin                | Africa                | Kenya       | Conflict | Camp               | Nutrition                                     | Distribution of food rations and micronutrient powders                                                                                   | Community health workers                      | Qualitative interviews, focus group discussions, direct observation | <ul style="list-style-type: none"> <li>- CHWs distributed food rations and micronutrient powders in a refugee camp.</li> <li>- CHWs were inadequately trained, which led to inadequate communication regarding the health benefits and use of micronutrient powder to the beneficiaries.</li> </ul>                                                                                                                                                                                                                                            |

|             |                                                                                                                                                           |      |                                                                                                                                                            |                 |                                           |          |                              |                  |                          |                       |                                             |                             |                                                                    |                                                                                                                                                                                                                                                                                                                                                                                                               |
|-------------|-----------------------------------------------------------------------------------------------------------------------------------------------------------|------|------------------------------------------------------------------------------------------------------------------------------------------------------------|-----------------|-------------------------------------------|----------|------------------------------|------------------|--------------------------|-----------------------|---------------------------------------------|-----------------------------|--------------------------------------------------------------------|---------------------------------------------------------------------------------------------------------------------------------------------------------------------------------------------------------------------------------------------------------------------------------------------------------------------------------------------------------------------------------------------------------------|
| Kodish      | Implications of the Ebola virus disease outbreak in Guinea: Qualitative findings to inform future health and nutrition-related responses                  | 2018 | GroundWork, United Nations Children's Fund, Guinea Ministry of Health                                                                                      | Journal article | PLOS One                                  | Africa   | Guinea                       | Disease outbreak | General population       | Nutrition             | Health education                            | Community health workers    | Qualitative interviews                                             | - CHWs delivered nutrition-related social and behavioral change communication during the Ebola outbreak.                                                                                                                                                                                                                                                                                                      |
| Koenig      | Tuberculosis in the aftermath of the 2010 earthquake in Haiti                                                                                             | 2015 | Haitian Study Group for Kaposi's Sarcoma and Opportunistic Infections, Haitian National Tuberculosis Program, Stanford University                          | Journal article | Bulletin of the World Health Organization | Americas | Haiti                        | Natural disaster | General population, camp | Infectious diseases   | Active case finding                         | Community health workers    | Documentation of experience, analysis of quantitative program data | - Community health workers conducted active case finding for TB following the Haiti earthquake.                                                                                                                                                                                                                                                                                                               |
| Kohli       | A Congolese community-based health program for survivors of sexual violence                                                                               | 2012 | Johns Hopkins Bloomberg School of Public Health, Foundation RamaLevina, Johns Hopkins University School of Nursing, Johns Hopkins Center for Global Health | Journal article | Conflict and Health                       | Africa   | Democratic Republic of Congo | Conflict         | General population       | Gender-based violence | Community mobilization, community education | Community health workers    | Documentation of experience                                        | - CHWs supported a program to bring health services to GBV survivors through mobile clinics.<br>- CHWs assisted providers in prioritizing services based on women's report of symptoms.<br>- CHWs informed communities of the services available and the mobile clinic schedule.<br>- CHWs helped with prioritization of services and community education topics based on their knowledge of the communities. |
| Kolaczinski | Adherence of community caretakers of children to pre-packaged antimalarial medicines (HOMAPAK) among internally displaced people in Gulu district, Uganda | 2006 | Malaria Consortium, London School of Hygiene & Tropical Medicine, Gulu District Health Services                                                            | Journal article | Malaria Journal                           | Africa   | Uganda                       | Conflict         | Camp                     | Child health          | Treatment of malaria                        | Community drug distributors | Household survey                                                   | - CHWs were able to correctly prescribe antimalarial medication for sick children in an IDP camp setting.<br>- Most caretakers sought care within 24 hours for children falling ill with fever.                                                                                                                                                                                                               |



|        |                                                                                                                       |      |                                                                |                 |                          |        |             |          |                    |              |                                                         |                              |                                                                                        |                                                                                                                                                                                                                                                                                                                                                                                                                                                                                                                                                                                                                                                                                                                                                                                                                                                                                                                                                                                                                                                                                                                                                                                                                                                                    |
|--------|-----------------------------------------------------------------------------------------------------------------------|------|----------------------------------------------------------------|-----------------|--------------------------|--------|-------------|----------|--------------------|--------------|---------------------------------------------------------|------------------------------|----------------------------------------------------------------------------------------|--------------------------------------------------------------------------------------------------------------------------------------------------------------------------------------------------------------------------------------------------------------------------------------------------------------------------------------------------------------------------------------------------------------------------------------------------------------------------------------------------------------------------------------------------------------------------------------------------------------------------------------------------------------------------------------------------------------------------------------------------------------------------------------------------------------------------------------------------------------------------------------------------------------------------------------------------------------------------------------------------------------------------------------------------------------------------------------------------------------------------------------------------------------------------------------------------------------------------------------------------------------------|
| Kozuki | The resilience of integrated community case management in acute emergency: A case study from Unity State, South Sudan | 2018 | International Rescue Committee, United Nations Children's Fund | Journal article | Journal of Global Health | Africa | South Sudan | Conflict | General population | Child health | Treatment of childhood pneumonia, diarrhea, and malaria | Community based distributors | Qualitative interviews, focus group discussions, analysis of quantitative program data | <ul style="list-style-type: none"> <li>- The large majority of CHWs continued their work during the crisis period.</li> <li>- The number of children treated declined by about 50% at the peak of the crisis, but then quickly recovered. The number of children treated by CHWs was consistently higher than by health facilities, before, during, and after the crisis.</li> <li>- Supervisors were able to use community networks to assess the security situation in specific areas and determine whether it was safe to travel and to track down CHWs to provide supervision and resupply them with drugs.</li> <li>- CHWs often moved with communities when they were displaced and continued treating sick children. CHWs in areas that received IDPs treated both their original host population and IDPs. Displaced CHWs also treated their displaced community members and the host population.</li> <li>- CHWs in areas that experienced a large influx of IDPs were not able to meet the demand for services due to limited drug supplies.</li> <li>- Caregivers preferred to seek care in the community to avoid traveling in insecure areas and because of a perception that health facilities were closed or lacked essential medicines.</li> </ul> |
|--------|-----------------------------------------------------------------------------------------------------------------------|------|----------------------------------------------------------------|-----------------|--------------------------|--------|-------------|----------|--------------------|--------------|---------------------------------------------------------|------------------------------|----------------------------------------------------------------------------------------|--------------------------------------------------------------------------------------------------------------------------------------------------------------------------------------------------------------------------------------------------------------------------------------------------------------------------------------------------------------------------------------------------------------------------------------------------------------------------------------------------------------------------------------------------------------------------------------------------------------------------------------------------------------------------------------------------------------------------------------------------------------------------------------------------------------------------------------------------------------------------------------------------------------------------------------------------------------------------------------------------------------------------------------------------------------------------------------------------------------------------------------------------------------------------------------------------------------------------------------------------------------------|

|          |                                                                                                      |      |                                                                  |                 |                                                   |                 |             |                  |                    |                         |                                                                                                                                                                                |                                                  |                                                                                        |                                                                                                                                                                                                                                                                                                                                                                                                                                                                                                                                                                                                                                                                                                                                                                                                                                                                                                                                                                                                                                                                                                                                                                                                                                                                    |
|----------|------------------------------------------------------------------------------------------------------|------|------------------------------------------------------------------|-----------------|---------------------------------------------------|-----------------|-------------|------------------|--------------------|-------------------------|--------------------------------------------------------------------------------------------------------------------------------------------------------------------------------|--------------------------------------------------|----------------------------------------------------------------------------------------|--------------------------------------------------------------------------------------------------------------------------------------------------------------------------------------------------------------------------------------------------------------------------------------------------------------------------------------------------------------------------------------------------------------------------------------------------------------------------------------------------------------------------------------------------------------------------------------------------------------------------------------------------------------------------------------------------------------------------------------------------------------------------------------------------------------------------------------------------------------------------------------------------------------------------------------------------------------------------------------------------------------------------------------------------------------------------------------------------------------------------------------------------------------------------------------------------------------------------------------------------------------------|
| Kozuki   | Integrated Community Case Management in Acute and Protracted Emergencies Case study for South Sudan  | 2017 | International Rescue Committee, United Nations Children's Fund   | Report          | N/A                                               | Africa          | South Sudan | Conflict         | General population | Child health, nutrition | Treatment of childhood pneumonia, diarrhea, and malaria                                                                                                                        | Community based distributors                     | Qualitative interviews, focus group discussions, analysis of quantitative program data | <ul style="list-style-type: none"> <li>- The large majority of CHWs continued their work during the crisis period.</li> <li>- The number of children treated declined by about 50% at the peak of the crisis, but then quickly recovered. The number of children treated by CHWs was consistently higher than by health facilities, before, during, and after the crisis.</li> <li>- Supervisors were able to use community networks to assess the security situation in specific areas and determine whether it was safe to travel and to track down CHWs to provide supervision and resupply them with drugs.</li> <li>- CHWs often moved with communities when they were displaced and continued treating sick children. CHWs in areas that received IDPs treated both their original host population and IDPs. Displaced CHWs also treated their displaced community members and the host population.</li> <li>- CHWs in areas that experienced a large influx of IDPs were not able to meet the demand for services due to limited drug supplies.</li> <li>- Caregivers preferred to seek care in the community to avoid traveling in insecure areas and because of a perception that health facilities were closed or lacked essential medicines.</li> </ul> |
| Kumar    | Managing Child Malnutrition in a Drought Affected District of Rajasthan – A Case Study               | 2005 | United Nations Children's Fund                                   | Journal article | Indian Journal of Public Health                   | South-East Asia | India       | Drought          | General population | Child health, nutrition | Growth monitoring and promotion, treatment of childhood malnutrition, treatment of childhood diarrhea, immunization, vitamin A supplementation, nutrition and health education | Nutrition care centre workers, Anganwadi workers | Documentation of experience, pre-post surveys                                          | <ul style="list-style-type: none"> <li>- Local community members were quickly trained and deployed to manage childhood malnutrition and provide a number of other malnutrition-related services during a nutrition emergency.</li> </ul>                                                                                                                                                                                                                                                                                                                                                                                                                                                                                                                                                                                                                                                                                                                                                                                                                                                                                                                                                                                                                           |
| Lantagne | Effective Use of Household Water Treatment and Safe Storage in Response to the 2010 Haiti Earthquake | 2013 | Tufts University, London School of Hygiene and Tropical Medicine | Journal article | American Society of Tropical Medicine and Hygiene | Americas        | Haiti       | Natural disaster | General population | WASH                    | Provision of water treatment and safe storage containers                                                                                                                       | Community health workers                         | Household surveys, household water testing                                             | <ul style="list-style-type: none"> <li>- CHWs distributed chlorine products and safe storage containers following the Haiti earthquake.</li> </ul>                                                                                                                                                                                                                                                                                                                                                                                                                                                                                                                                                                                                                                                                                                                                                                                                                                                                                                                                                                                                                                                                                                                 |

|          |                                                                                                                                                                        |      |                                                                                                                                                                                        |                 |                                            |                       |           |          |                    |                                                                     |                                                                                                                                                                                              |                                           |                             |                                                                                                                                                                                                                                                                                                                                                                                                                                                                                                                                         |
|----------|------------------------------------------------------------------------------------------------------------------------------------------------------------------------|------|----------------------------------------------------------------------------------------------------------------------------------------------------------------------------------------|-----------------|--------------------------------------------|-----------------------|-----------|----------|--------------------|---------------------------------------------------------------------|----------------------------------------------------------------------------------------------------------------------------------------------------------------------------------------------|-------------------------------------------|-----------------------------|-----------------------------------------------------------------------------------------------------------------------------------------------------------------------------------------------------------------------------------------------------------------------------------------------------------------------------------------------------------------------------------------------------------------------------------------------------------------------------------------------------------------------------------------|
| Lawton   | Health care in Nicaragua                                                                                                                                               | 1988 | World Health Organization                                                                                                                                                              | Journal article | Nurse Practitioner                         | Americas              | Nicaragua | Conflict | General population | Child health, maternal health, WASH, infectious diseases, nutrition | Immunization, provision of malaria chemoprophylaxis, malaria and TB screening, nutrition screening, health education, WASH promotion, assisted home delivery, antenatal care, postnatal care | Brigadistas, traditional birth attendants | Documentation of experience | <ul style="list-style-type: none"> <li>– Brigadistas provided a wide range of preventive, promotive, and curative health services in the community.</li> <li>– TBAs assisted in home-deliveries when referral to a health facility was not possible.</li> <li>– The healthcare system, which relied heavily on community-based health workers, led to high access to healthcare services and improved health indicators.</li> <li>– War decreased availability of healthcare services, equipment and supplies for civilians.</li> </ul> |
| Lee      | Mortality rates in conflict zones in Karen, Karenni, and Mon states in eastern Burma                                                                                   | 2006 | University of California, Los Angeles; Bloomberg School of Public Health; Albert Einstein College of Medicine; University of California, Berkeley; Backpack Health Worker Team         | Journal article | Tropical Medicine and International Health | South-East Asia       | Myanmar   | Conflict | General population | Research                                                            | Data collection for mortality survey                                                                                                                                                         | Backpack health workers                   | Household survey            | <ul style="list-style-type: none"> <li>– BPHWs members collected mortality data in areas affected by conflict that were inaccessible to outside data collectors.</li> </ul>                                                                                                                                                                                                                                                                                                                                                             |
| Lee      | Internally displaced human resources for health: Villager health worker partnerships to scale up a malaria control programme in active conflict areas of eastern Burma | 2009 | Global Health Access Program; Karen Department of Health and Welfare; University of California, San Francisco; University of California, Los Angeles                                   | Journal article | Global Public Health                       | South-East Asia       | Myanmar   | Conflict | General population | Child health, infectious diseases                                   | Treatment of malaria, health education                                                                                                                                                       | Village health workers                    | Documentation of experience | <ul style="list-style-type: none"> <li>– Village health workers were trained, supervised, and supplied by mobile health workers who received training and supplies across the border in Thailand.</li> <li>– Village-based health workers were less likely to be targeted by the Burmese military or militias than mobile health workers because of they are based in one community and were less conspicuous.</li> </ul>                                                                                                               |
| Lembani  | A Case Study of Health Service Provision in Yobe State, Nigeria in the Context of the Boko Haram Insurgency                                                            | 2014 | University of Western Cape, Partnership for Reviving Routine Immunization in Northern Nigeria and Maternal Newborn Child Health Programme, Columbia University, University of Montreal | Report          | N/A                                        | Africa                | Nigeria   | Conflict | General population | Not specified                                                       | Not specified                                                                                                                                                                                | Community health workers                  | Qualitative interviews      | <ul style="list-style-type: none"> <li>– CHWs coordinated with community members to warn health workers when it was not safe to travel to communities.</li> </ul>                                                                                                                                                                                                                                                                                                                                                                       |
| Lhussier | Development and implementation of a nutrition intervention programme in North West Pakistan: a realist framework                                                       | 2011 | Northumbria University, Nahaqi Emergency Satellite Hospital, University of Central Lancashire, Khyber Medical College                                                                  | Journal article | Health Promotion International             | Eastern Mediterranean | Pakistan  | Conflict | General population | Maternal health, newborn health, nutrition                          | Cooking demonstrations, provision of nutrition supplementation, health and nutrition education                                                                                               | Lady health workers                       | Focus group discussions     | <ul style="list-style-type: none"> <li>– LHWs provided nutritional support and education in areas with high levels of malnutrition.</li> <li>– The program had a positive impact on knowledge gained by women in the community.</li> </ul>                                                                                                                                                                                                                                                                                              |

|     |                                                                                                                           |      |                                                                                                                                                                                                                                                     |                 |                         |                 |         |          |                    |               |                                                    |                         |                                         |                                                                                                                                                                                                                                                                                                                                                                                                                                                                                                                                                                                                                                                                                                                                                                                                                                                                                                                                                                                                                                                                                                                                                                                                                                                                                                                                                                                                                                                                                                                                                                                     |
|-----|---------------------------------------------------------------------------------------------------------------------------|------|-----------------------------------------------------------------------------------------------------------------------------------------------------------------------------------------------------------------------------------------------------|-----------------|-------------------------|-----------------|---------|----------|--------------------|---------------|----------------------------------------------------|-------------------------|-----------------------------------------|-------------------------------------------------------------------------------------------------------------------------------------------------------------------------------------------------------------------------------------------------------------------------------------------------------------------------------------------------------------------------------------------------------------------------------------------------------------------------------------------------------------------------------------------------------------------------------------------------------------------------------------------------------------------------------------------------------------------------------------------------------------------------------------------------------------------------------------------------------------------------------------------------------------------------------------------------------------------------------------------------------------------------------------------------------------------------------------------------------------------------------------------------------------------------------------------------------------------------------------------------------------------------------------------------------------------------------------------------------------------------------------------------------------------------------------------------------------------------------------------------------------------------------------------------------------------------------------|
| Lim | Trauma and mental health of medics in eastern Myanmar's conflict zones: a cross-sectional and mixed methods investigation | 2013 | University of California Berkeley School of Public Health, University of California San Francisco School of Medicine, Global Health Access Program, University of California Los Angeles School of Medicine, Karen Department of Health and Welfare | Journal article | Conflict and Health     | South-East Asia | Myanmar | Conflict | General population | Not specified | Basic healthcare (not specified), health education | Backpack health workers | Survey of BPHWs, qualitative interviews | <ul style="list-style-type: none"> <li>- BPHWs discussed a variety of hardships resulting from their roles, including challenges related to their work, personal/family-related issues, security, violence, and threats from the Burmese military, and early life trauma.</li> <li>- Work-related sources of distress resulted from feelings of incompetence, lack of medical resources, transportation barriers and personnel shortages.</li> <li>- Medics who spoke of feelings of ineptness in patient care also expressed feelings of shame, helplessness, and embarrassment.</li> <li>- The majority of BPHWs seldom saw their families for extended periods of time, ranging from once every three months to over a decade.</li> <li>- BPHWs felt unprepared in cases of complex medical situations.</li> <li>- Security issues and threats of violence from the Burmese army were a major stressor for the medics. These continuing security threats limited medics' ability to provide health services.</li> <li>- The fear of being attacked while traveling was a significant source of anxiety.</li> <li>- BPHWs were often at risk of injury from antipersonnel landmines, with many reportedly triggering or nearly detonating landmines.</li> <li>- BPHWs felt that the relations developed within medic teams were essential for psychological wellbeing and social support, especially in isolated or unstable areas.</li> <li>- Forms of coping included confiding in friends and family, group activities, personal hobbies, and religious activities.</li> </ul> |
| Lim | Vicarious traumatization and resilience of health workers                                                                 | 2015 | N/A                                                                                                                                                                                                                                                 | Book chapter    | Dartmouth College Press | South-East Asia | Myanmar | Conflict | General population | Not specified | Not specified                                      | Backpack health workers | Qualitative research (not specified)    | <ul style="list-style-type: none"> <li>- BPHWs experienced manifestations of psychiatric symptoms due to violence, a loss of security, and other stressors.</li> <li>- BPHWs recounted traumatic events that left lasting impressions, such as being beaten by Burmese soldiers, witnessing family members abused or killed by soldiers, and seeing dead bodies in the aftermath of destroyed villages.</li> <li>- BPHWs used emotion-focused coping mechanisms, centered on social engagement, peer support, and personal time, along with problem-focused coping, motivated by altruism in their community-oriented work.</li> </ul>                                                                                                                                                                                                                                                                                                                                                                                                                                                                                                                                                                                                                                                                                                                                                                                                                                                                                                                                              |

|         |                                                                                                                                                                                      |      |                                                                                                                                                                                                                                            |                 |                                           |                       |             |                                              |                    |                                                                    |                                                                                                                                                                                                                                 |                                                                                                         |                                                                                        |                                                                                                                                                                                                                                                                                           |
|---------|--------------------------------------------------------------------------------------------------------------------------------------------------------------------------------------|------|--------------------------------------------------------------------------------------------------------------------------------------------------------------------------------------------------------------------------------------------|-----------------|-------------------------------------------|-----------------------|-------------|----------------------------------------------|--------------------|--------------------------------------------------------------------|---------------------------------------------------------------------------------------------------------------------------------------------------------------------------------------------------------------------------------|---------------------------------------------------------------------------------------------------------|----------------------------------------------------------------------------------------|-------------------------------------------------------------------------------------------------------------------------------------------------------------------------------------------------------------------------------------------------------------------------------------------|
| Lin     | Stimulating demand: An assessment of the conditional cash transfer project in Afghanistan                                                                                            | 2016 | Johns Hopkins University                                                                                                                                                                                                                   | Dissertation    | N/A                                       | Eastern Mediterranean | Afghanistan | Conflict                                     | General population | Maternal health, child health                                      | Referral for facility delivery, referral for immunization                                                                                                                                                                       | Community health workers                                                                                | Household survey, qualitative interviews, health facility assessments, document review | <ul style="list-style-type: none"> <li>– Cash payments to CHWs for DPT3 and institutional delivery referrals were not associated with service utilization.</li> <li>– The incentive program made it possible to recruit CHWs in communities that did not have CHWs previously.</li> </ul> |
| Lori    | Patient Satisfaction With Maternity Waiting Homes in Liberia: A Case Study During the Ebola Outbreak                                                                                 | 2017 | University of Michigan, Africare, Management Sciences for Health                                                                                                                                                                           | Journal article | Journal of Midwifery & Women's Health     | Africa                | Liberia     | Disease outbreak                             | General population | Maternal health, infectious diseases                               | Support to pregnant women at maternal waiting homes                                                                                                                                                                             | Traditional birth attendants                                                                            | Patient satisfaction surveys, qualitative interviews                                   | <ul style="list-style-type: none"> <li>– TBAs stayed with women during their time in maternal waiting homes and described a positive environment at MWHs.</li> </ul>                                                                                                                      |
| Low     | Human resources for health: task shifting to promote basic health service delivery among internally displaced people in ethnic health program service areas in eastern Burma/Myanmar | 2014 | Community Partners International, Burma Medical Association, Health Information System Working Group, Back Pack Health Worker Team, Mae Tao Clinic, Karen Department of Health and Welfare, London School of Hygiene and Tropical Medicine | Journal article | Global Health Action                      | South-East Asia       | Myanmar     | Conflict                                     | General population | Maternal health, newborn health, child health, reproductive health | Assisted home delivery, antenatal care, postnatal care, provision of contraceptives, immunization, health education, deworming, vitamin A supplementation, WASH promotion                                                       | Community health workers, maternal health workers, traditional birth attendants, village health workers | Qualitative interviews, analysis of quantitative program data, record review           | <ul style="list-style-type: none"> <li>– Task shifting resulted in a broad range of services being delivered by CHWs, MHWs, and TBAs, including medical care, maternal and child health services, and community health education and prevention.</li> </ul>                               |
| Lucchi  | Moving from the 'why' to the 'how': reflections on humanitarian response in urban settings                                                                                           | 2012 | Médecins Sans Frontières                                                                                                                                                                                                                   | Journal article | Disasters                                 | Various               | Various     | Conflict, disease outbreak, natural disaster | General population | Not specified                                                      | Community outreach (not specified)                                                                                                                                                                                              | Community health workers, community outreach workers                                                    | Documentation of experience, qualitative interviews, document review                   | <ul style="list-style-type: none"> <li>– Community outreach and interaction with communities is key to the urban medical strategy.</li> <li>– Community-based workers can play a key role in monitoring and measuring achievements.</li> </ul>                                            |
| Lucknow | Implementation research on community health workers' provision of maternal and child health services in rural Liberia                                                                | 2017 | Dartmouth College, Last Mile Health, University of Oxford, Harvard University, University of Minnesota, Liberia Ministry of Health, University of Georgetown                                                                               | Journal article | Bulletin of the World Health Organization | Africa                | Liberia     | Disease outbreak                             | General population | Maternal health, newborn health, child health                      | Treatment of childhood pneumonia, diarrhea, and malaria; malnutrition screening; health education; promotion of facility delivery; screening pregnant women and newborns for danger signs; promotion of exclusive breastfeeding | Community health workers                                                                                | Pre-post household surveys                                                             | <ul style="list-style-type: none"> <li>– During the Ebola outbreak CHWs were trained to carry out active surveillance in the communities.</li> <li>– No touch ICCM was enacted to prevent transmission of Ebola between patients and CHWs.</li> </ul>                                     |

|                    |                                                                                                                |               |                                                                                                                                                                                                      |                 |                                   |                       |             |                  |                    |                                         |                                                                                                        |                                                        |                                                        |                                                                                                                                                                                                                                                                                                                                                                                                                                                                                              |
|--------------------|----------------------------------------------------------------------------------------------------------------|---------------|------------------------------------------------------------------------------------------------------------------------------------------------------------------------------------------------------|-----------------|-----------------------------------|-----------------------|-------------|------------------|--------------------|-----------------------------------------|--------------------------------------------------------------------------------------------------------|--------------------------------------------------------|--------------------------------------------------------|----------------------------------------------------------------------------------------------------------------------------------------------------------------------------------------------------------------------------------------------------------------------------------------------------------------------------------------------------------------------------------------------------------------------------------------------------------------------------------------------|
| Magidson           | Adaptation of community health worker-delivered behavioral activation for torture survivors in Kurdistan, Iraq | 2015          | Massachusetts General Hospital, Harvard Medical School, University of Maryland, University of Sulaimani, Johns Hopkins Bloomberg School of Public Health, University of Massachusetts Medical School | Journal article | Global Mental Health              | Eastern Mediterranean | Iraq        | Conflict         | General population | Mental health                           | Psychosocial support                                                                                   | Community health workers                               | Documentation of experience                            | <ul style="list-style-type: none"> <li>- CHWs delivered behavioral activation treatment for depression in a conflict setting with poor resources in Kurdistan, Iraq.</li> <li>- Of those that initiated treatment, 52% completed all 12 sessions.</li> <li>- Training CHWs in behavioral activation treatment for depression was less complicated and time consuming than training a more comprehensive treatment package that included both behavioral and cognitive strategies.</li> </ul> |
| Maheen             | Rural Women's Experience of Living and Giving Birth in Relief Camps in Pakistan                                | 2017          | Deakin University                                                                                                                                                                                    | Journal article | PLOS Currents Disasters           | Eastern Mediterranean | Pakistan    | Conflict         | Camp               | Maternal health                         | Assisted home delivery                                                                                 | Traditional birth attendants                           | Qualitative interviews                                 | <ul style="list-style-type: none"> <li>- Woman who could not afford to go to a hospital or did not have the means of transportation, were assisted by TBAs.</li> <li>- None of the TBAs had received clean delivery kits.</li> </ul>                                                                                                                                                                                                                                                         |
| Malaria Consortium | Addressing emergency nutritional needs in young children                                                       | Not specified | Malaria Consortium                                                                                                                                                                                   | Report          | N/A                               | Africa                | South Sudan | Conflict         | General population | Child health, nutrition                 | Treatment of childhood pneumonia, diarrhea, and malnutrition; health education; community mobilization | Community nutrition workers                            | Not specified                                          | <ul style="list-style-type: none"> <li>- CHWs were able to add treatment of childhood malnutrition on the existing iCCM services in an insecure contexts.</li> </ul>                                                                                                                                                                                                                                                                                                                         |
| Mayhew             | Determinants of Skilled Birth Attendant Utilization in Afghanistan: A Cross-Sectional Study                    | 2008          | Vancouver Coastal Health, University of British Columbia, Johns Hopkins Bloomberg School of Public Health, Indian Institute of Health Management Research, Afghanistan Ministry of Public Health     | Journal article | American Journal of Public Health | Eastern Mediterranean | Afghanistan | Conflict         | General population | Maternal health, newborn health         | Not specified                                                                                          | Community health workers, traditional birth attendants | Household surveys                                      | <ul style="list-style-type: none"> <li>- There was a limited number of female CHWs.</li> <li>- Male CHWs were associated with lower levels of skilled birth attendance.</li> </ul>                                                                                                                                                                                                                                                                                                           |
| Mbaeyi             | Strengthening Acute Flaccid Paralysis Surveillance Through the Village Polio Volunteers Program in Somalia     | 2018          | US Centers for Disease Control and Prevention, World Health Organization                                                                                                                             | Journal article | Clinical Infectious Diseases      | Eastern Mediterranean | Somalia     | Disease outbreak | General population | Infectious diseases                     | Active case finding, community sensitization                                                           | Village polio volunteers                               | Analysis of quantitative program data, document review | <ul style="list-style-type: none"> <li>- VPVs carried out active polio case finding and community sensitization for immunization campaigns.</li> <li>- VPVs accounted for a high proportion of AFP cases reported in Somalia.</li> <li>- VPVs were especially important in areas with security and access limitations.</li> </ul>                                                                                                                                                            |
| Mbonye             | Ebola Viral Hemorrhagic Disease Outbreak in West Africa- Lessons from Uganda                                   | 2014          | Makerere University, Uganda Ministry of Health, World Health Organization                                                                                                                            | Journal article | African Health Sciences           | Africa                | Uganda      | Disease outbreak | General population | Infectious diseases                     | Active case finding, contact tracing, health education                                                 | Village health teams                                   | Documentation of experience, document review           | <ul style="list-style-type: none"> <li>- Village health teams were an important part of the disease surveillance system in Uganda, and carried out active case finding, contact tracing, health education.</li> </ul>                                                                                                                                                                                                                                                                        |
| McBride            | In Pakistan's flood-devastated Sindh province, female health workers play key role                             | 2010          | United Nations Children's Fund                                                                                                                                                                       | Web blog        | N/A                               | Eastern Mediterranean | Pakistan    | Natural disaster | General population | Child health, WASH, reproductive health | Health education, treatment of childhood diarrhea                                                      | Lady health workers                                    | Documentation of experience                            | <ul style="list-style-type: none"> <li>- Following a flooding emergency, LHWs provided community education on prevention and treatment of diarrhea.</li> </ul>                                                                                                                                                                                                                                                                                                                               |

|           |                                                                                                                                                             |      |                                                                                                                                                                           |                 |                                             |                 |              |                  |                    |                     |                                                                                                |                          |                                           |                                                                                                                                                                                                                                                                                                                                                                                                                                                                                                                                                                                                                                                                                                                                                                                                                                                                                          |
|-----------|-------------------------------------------------------------------------------------------------------------------------------------------------------------|------|---------------------------------------------------------------------------------------------------------------------------------------------------------------------------|-----------------|---------------------------------------------|-----------------|--------------|------------------|--------------------|---------------------|------------------------------------------------------------------------------------------------|--------------------------|-------------------------------------------|------------------------------------------------------------------------------------------------------------------------------------------------------------------------------------------------------------------------------------------------------------------------------------------------------------------------------------------------------------------------------------------------------------------------------------------------------------------------------------------------------------------------------------------------------------------------------------------------------------------------------------------------------------------------------------------------------------------------------------------------------------------------------------------------------------------------------------------------------------------------------------------|
| McMahon   | "We and the nurses are now working with one voice": How community leaders and health committee members describe their role in Sierra Leone's Ebola response | 2017 | Heidelberg University, Johns Hopkins School of Public Health, The International Rescue Committee, Durham University, Njala University, Mercy Hospital Research Laboratory | Journal article | BMC Health Services Research                | Africa          | Sierra Leone | Disease outbreak | General population | Infectious diseases | Contact tracing, case finding, health education, encouraging care seeking, labor-related tasks | Community volunteers     | Focus group discussions                   | <ul style="list-style-type: none"> <li>- During the Ebola outbreak, community volunteers carried out contact tracing, case finding, screening for symptoms, notifying burial teams of deaths, health education, promotion of care seeking, and labor-related tasks.</li> <li>- Some activities were coordinated and compensated through programs supported by NGOs or the government, while others sprang from volunteers' own initiative.</li> <li>- Community volunteers served to transmit the concerns of the community members to health providers and to answer sensitive questions.</li> <li>- Community volunteers were motivated through a sense of service to their community, a fear of Ebola, and financial compensation.</li> <li>- Emotional and logistical barriers were discouraging for community volunteers and made their tasks more difficult to execute.</li> </ul> |
| McPherson | Are Birth-Preparedness Programmes Effective? Results From a Field Trial in Siraha District, Nepal                                                           | 2006 | Save the Children                                                                                                                                                         | Journal article | Journal of Health, Population and Nutrition | South-East Asia | Nepal        | Conflict         | General population | Maternal health     | Health education, birth preparedness promotion                                                 | Community health workers | Pre-post household surveys, no comparison | <ul style="list-style-type: none"> <li>- CHWs provided health education and promoted birth preparedness for women in the community.</li> <li>- Fifty-four percent of respondents (n=162) were directly exposed to BPP materials while pregnant.</li> <li>- Women's knowledge, use of health services, preparation for emergencies, and key newborn practices all increased significantly.</li> <li>- Skilled birth attendance and use of emergency obstetric care did not change.</li> </ul>                                                                                                                                                                                                                                                                                                                                                                                             |

|                          |                                                                                                                    |      |                                                                |                  |                                  |                       |             |          |                    |                                               |                                                                                                            |                              |                               |                                                                                                                                                                                                                                                                                                                                                                                                                                                                                                                                                                                                                                                                                                                                                                                                                                                                                                                                                                                                                                                                                                                                                                                                                   |
|--------------------------|--------------------------------------------------------------------------------------------------------------------|------|----------------------------------------------------------------|------------------|----------------------------------|-----------------------|-------------|----------|--------------------|-----------------------------------------------|------------------------------------------------------------------------------------------------------------|------------------------------|-------------------------------|-------------------------------------------------------------------------------------------------------------------------------------------------------------------------------------------------------------------------------------------------------------------------------------------------------------------------------------------------------------------------------------------------------------------------------------------------------------------------------------------------------------------------------------------------------------------------------------------------------------------------------------------------------------------------------------------------------------------------------------------------------------------------------------------------------------------------------------------------------------------------------------------------------------------------------------------------------------------------------------------------------------------------------------------------------------------------------------------------------------------------------------------------------------------------------------------------------------------|
| Médecins Sans Frontières | Yambio HIV community-based test and treat pilot project                                                            | 2018 | Médecins Sans Frontières                                       | Report           | N/A                              | Africa                | South Sudan | Conflict | General population | Infectious diseases                           | Health education, HIV testing, follow-up with patients, active HIV case finding                            | Community health workers     | Documentation of experience   | <ul style="list-style-type: none"> <li>- CHWs carried out education on HIV, active case finding, patient follow-up, and in exceptional cases, HIV testing.</li> <li>- The programme was successful in achieving higher ART coverage for those with HIV.</li> <li>- Hiring CHWs from the area of operation improved the follow-up of patients to ensure adherence to treatment.</li> <li>- In periods of active insecurity, CHWs provided patients with a 'runaway' bag containing three months of additional ARV as well as their regular stock. During the period of the project, the contingency plan was triggered several times. Evaluation of the context at regular intervals allowed the team to activate the contingency plan on time, before the situation deteriorated to a point where restrictions imposed on the movements of the CHWs would make them unable to pick up the medication from the clinic. Evaluation of the context at regular intervals allowed the team to activate the contingency plan on time, before the situation deteriorated to a point where restrictions imposed on the movements of the CHWs would make them unable to pick up the medication from the clinic.</li> </ul> |
| Memon                    | Residual Barriers for Utilization of Maternal and Child Health Services: Community Perceptions From Rural Pakistan | 2016 | Aga Khan University                                            | Journal article  | Global Journal of Health Science | Eastern Mediterranean | Pakistan    | Conflict | General population | Maternal health, newborn health, child health | Health education                                                                                           | Lady health workers          | Focus group discussions       | <ul style="list-style-type: none"> <li>- Home based deliveries were preferred unless complications occurred or TBAs were not competent enough.</li> <li>- Awareness of the importance of key MNCH practices was low in areas with and without LHWs, although awareness of the importance of care seeking was higher in areas with LHWs.</li> </ul>                                                                                                                                                                                                                                                                                                                                                                                                                                                                                                                                                                                                                                                                                                                                                                                                                                                                |
| Miller                   | Trained traditional birth attendants as educators of refugee mothers                                               | 1995 | Mercy Corps International, Tufts University School of Medicine | Magazine article | World Health Forum               | Eastern Mediterranean | Pakistan    | Conflict | Camp               | Maternal health, child health                 | Health education; promotion of immunization, nutrition, and hygiene; prenatal evaluation; postnatal visits | Traditional birth attendants | Survey of TBAs and households | <ul style="list-style-type: none"> <li>- Trained birth attendants visited pregnant women frequently, advising on immunizations and hygiene and conducting prenatal evaluations, and performing postnatal visits.</li> <li>- Trained birth attendants had better knowledge of disease prevention and breastfeeding than untrained birth attendants.</li> <li>- Mothers reported that trained birth attendants used recommended sterilization procedures, while untrained birth attendants had unsafe practices during delivery and failed to follow appropriate postpartum procedures, and didn't consistently carry out postnatal visits.</li> </ul>                                                                                                                                                                                                                                                                                                                                                                                                                                                                                                                                                              |



|        |                                                                                         |      |                                                                                                                                                                                         |                 |                          |        |                               |                  |                    |                                                                    |                                                                                                                                                                                                          |                                                        |                                                                                        |                                                                                                                                                                                                                                                                                                                                                                                                                                                                                                                                                                                                                                                                                                                                                                                                                                                                                                                                                                                                                                                                                                                                                                                                                                                                                                                                                                                                                                                                                                                                                                                                                                                                                                                                                                                                                                                                                                                                                                                                                                                                                                                                                                                                                                                                                                |
|--------|-----------------------------------------------------------------------------------------|------|-----------------------------------------------------------------------------------------------------------------------------------------------------------------------------------------|-----------------|--------------------------|--------|-------------------------------|------------------|--------------------|--------------------------------------------------------------------|----------------------------------------------------------------------------------------------------------------------------------------------------------------------------------------------------------|--------------------------------------------------------|----------------------------------------------------------------------------------------|------------------------------------------------------------------------------------------------------------------------------------------------------------------------------------------------------------------------------------------------------------------------------------------------------------------------------------------------------------------------------------------------------------------------------------------------------------------------------------------------------------------------------------------------------------------------------------------------------------------------------------------------------------------------------------------------------------------------------------------------------------------------------------------------------------------------------------------------------------------------------------------------------------------------------------------------------------------------------------------------------------------------------------------------------------------------------------------------------------------------------------------------------------------------------------------------------------------------------------------------------------------------------------------------------------------------------------------------------------------------------------------------------------------------------------------------------------------------------------------------------------------------------------------------------------------------------------------------------------------------------------------------------------------------------------------------------------------------------------------------------------------------------------------------------------------------------------------------------------------------------------------------------------------------------------------------------------------------------------------------------------------------------------------------------------------------------------------------------------------------------------------------------------------------------------------------------------------------------------------------------------------------------------------------|
| Miller | Community health workers during the Ebola outbreak in Guinea, Liberia, and Sierra Leone | 2018 | United Nations Children's Fund, Anthrologica, Republic of Guinea Ministry of Health, Republic of Sierra Leone Ministry of Health and Sanitation, Republic of Liberia Ministry of Health | Journal article | Journal of global health | Africa | Guinea, Liberia, Sierra Leone | Disease outbreak | General population | Child health, maternal health, newborn health, infectious diseases | Treatment of childhood pneumonia, diarrhea, and malaria; health education; malnutrition screening; immunization; infectious disease control; postnatal visits; monitoring and referral of pregnant women | Community health workers, traditional birth attendants | Qualitative interviews, focus group discussions, analysis of quantitative program data | <ul style="list-style-type: none"> <li>- CHWs and TBAs continued their work during Ebola, including in the early outbreak period when they did not receive any instruction or support.</li> <li>- Case management services declined sharply (and ceased altogether in some areas) because of explicit instruction to discontinue treatments or because of lack of supplies of drugs. However, when CHWs received clear instructions to continue services and supplies, services quickly rebounded.</li> <li>- Services that did not depend on drug supplies continued, demonstrating that CHWs continued to be active and continued providing their routine services that were not dependent on outside support or supplies.</li> <li>- World Health Organization, United Nations Children's Fund, and MoHs developed "no touch" iCCM policy. However, CHWs received training on the "not touch" policy late in the outbreak and there was a great deal of confusion over the policy.</li> <li>- Routine services were more likely to be disrupted in districts that were affected earlier in the outbreak. In districts that had later transmission, they were better prepared and policies and structures were already in place, CHWs could be trained on the "no touch" policy, and routine services were more likely to continue.</li> <li>- In Guinea, Liberia, and Sierra Leone during Ebola, supply chain and supervision weaknesses that hampered service delivery before the outbreak were further exacerbated by the outbreak.</li> <li>- Because of their ties to health facilities, communities displayed elevated levels of fear and mistrust toward CHWs. However, the close relationships CHWs had with community members were more resilient than the relationships communities had with facility-based health workers and community members preferred to seek care from CHWs than from health facilities. The trust of CHWs as community members also helped overcome confusion and fear about Ebola and many respondents believed CHWs' activities helped break chains of transmission.</li> <li>- Women increased home deliveries with TBAs rather than go to health facilities. However, TBAs were rarely given any training, support, or protective materials.</li> </ul> |
|--------|-----------------------------------------------------------------------------------------|------|-----------------------------------------------------------------------------------------------------------------------------------------------------------------------------------------|-----------------|--------------------------|--------|-------------------------------|------------------|--------------------|--------------------------------------------------------------------|----------------------------------------------------------------------------------------------------------------------------------------------------------------------------------------------------------|--------------------------------------------------------|----------------------------------------------------------------------------------------|------------------------------------------------------------------------------------------------------------------------------------------------------------------------------------------------------------------------------------------------------------------------------------------------------------------------------------------------------------------------------------------------------------------------------------------------------------------------------------------------------------------------------------------------------------------------------------------------------------------------------------------------------------------------------------------------------------------------------------------------------------------------------------------------------------------------------------------------------------------------------------------------------------------------------------------------------------------------------------------------------------------------------------------------------------------------------------------------------------------------------------------------------------------------------------------------------------------------------------------------------------------------------------------------------------------------------------------------------------------------------------------------------------------------------------------------------------------------------------------------------------------------------------------------------------------------------------------------------------------------------------------------------------------------------------------------------------------------------------------------------------------------------------------------------------------------------------------------------------------------------------------------------------------------------------------------------------------------------------------------------------------------------------------------------------------------------------------------------------------------------------------------------------------------------------------------------------------------------------------------------------------------------------------------|

|        |                                                                            |      |                                                   |            |     |                       |       |          |                    |              |                                                                                                   |                          |                                                 |                                                                                                                                                                                                                                                                                                                                                                                                                                                                                                                                                                                                                                                                                                                                                                                                                                                                                                                                                                                                                                                                                                                                                                                                                                                           |
|--------|----------------------------------------------------------------------------|------|---------------------------------------------------|------------|-----|-----------------------|-------|----------|--------------------|--------------|---------------------------------------------------------------------------------------------------|--------------------------|-------------------------------------------------|-----------------------------------------------------------------------------------------------------------------------------------------------------------------------------------------------------------------------------------------------------------------------------------------------------------------------------------------------------------------------------------------------------------------------------------------------------------------------------------------------------------------------------------------------------------------------------------------------------------------------------------------------------------------------------------------------------------------------------------------------------------------------------------------------------------------------------------------------------------------------------------------------------------------------------------------------------------------------------------------------------------------------------------------------------------------------------------------------------------------------------------------------------------------------------------------------------------------------------------------------------------|
| Miller | Implementing integrated community case management during conflict in Yemen | 2019 | United Nations Children's Fund, Save the Children | Manuscript | N/A | Eastern Mediterranean | Yemen | Conflict | General population | Child health | Treatment of childhood pneumonia, diarrhea, and malaria; health education; malnutrition screening | Community health workers | Qualitative interviews, focus group discussions | <ul style="list-style-type: none"> <li>- CHWs provided treatment for uncomplicated pneumonia, diarrhea, and malaria; provided education on health, nutrition, and hygiene; screened children for acute malnutrition.</li> <li>- Policy, coordination, and funding were challenged by the fact that iCCM was not integrated into the national health system and was implemented as a short-term emergency program.</li> <li>- Villages that received services from a CHW who was based in a different community experienced reduced access to services, especially during times of heightened conflict and insecurity, when CHWs could not travel.</li> <li>- Supervision, supply chain, and monitoring were all challenges that were exacerbated by difficulties in travel due to the conflict. Potential solutions to these included the use of mobile technology for supervision and data collection and pre-positioning of buffer stocks in locations closer to CHWs.</li> <li>- Travel was seen as the primary threat to the safety of CHWs and supervisors. Measures taken to reduce the risk included limiting travel during periods of heightened insecurity, safety training for CHWs, and use of mobile technology for communication.</li> </ul> |
|--------|----------------------------------------------------------------------------|------|---------------------------------------------------|------------|-----|-----------------------|-------|----------|--------------------|--------------|---------------------------------------------------------------------------------------------------|--------------------------|-------------------------------------------------|-----------------------------------------------------------------------------------------------------------------------------------------------------------------------------------------------------------------------------------------------------------------------------------------------------------------------------------------------------------------------------------------------------------------------------------------------------------------------------------------------------------------------------------------------------------------------------------------------------------------------------------------------------------------------------------------------------------------------------------------------------------------------------------------------------------------------------------------------------------------------------------------------------------------------------------------------------------------------------------------------------------------------------------------------------------------------------------------------------------------------------------------------------------------------------------------------------------------------------------------------------------|

|        |                                                              |      |                                                                                     |        |     |        |        |                  |                    |                                                                    |                                                                                                                                                                                                          |                                                        |                                                                                        |                                                                                                                                                                                                                                                                                                                                                                                                                                                                                                                                                                                                                                                                                                                                                                                                                                                                                                                                                                                                                                                                                                                                                                                                                                            |
|--------|--------------------------------------------------------------|------|-------------------------------------------------------------------------------------|--------|-----|--------|--------|------------------|--------------------|--------------------------------------------------------------------|----------------------------------------------------------------------------------------------------------------------------------------------------------------------------------------------------------|--------------------------------------------------------|----------------------------------------------------------------------------------------|--------------------------------------------------------------------------------------------------------------------------------------------------------------------------------------------------------------------------------------------------------------------------------------------------------------------------------------------------------------------------------------------------------------------------------------------------------------------------------------------------------------------------------------------------------------------------------------------------------------------------------------------------------------------------------------------------------------------------------------------------------------------------------------------------------------------------------------------------------------------------------------------------------------------------------------------------------------------------------------------------------------------------------------------------------------------------------------------------------------------------------------------------------------------------------------------------------------------------------------------|
| Miller | Community health workers during the Ebola outbreak in Guinea | 2017 | Anthrologica, United Nations Children's Fund, Republic of Guinea Ministry of Health | Report | N/A | Africa | Guinea | Disease outbreak | General population | Child health, maternal health, newborn health, infectious diseases | Treatment of childhood pneumonia, diarrhea, and malaria; health education; malnutrition screening; immunization; infectious disease control; postnatal visits; monitoring and referral of pregnant women | Community health workers, traditional birth attendants | Qualitative interviews, focus group discussions, analysis of quantitative program data | <ul style="list-style-type: none"> <li>- Whether case management services continued was dependent on several factors, including instructions from the NGO partner and whether an area experienced Ebola transmission earlier or later in the outbreak.</li> <li>- When CHWs were instructed to continue and were trained on the 'no touch' protocol, many CHWs remained active in their communities and were willing to continue providing health-related services.</li> <li>- Although CHWs faced mistrust and stigma because of their ties to health facilities, they were better able to gain the trust of community members because of their longstanding relationships.</li> <li>- CHWs carried out contact tracing, case finding, social mobilisation and community engagement, and informal caregiving to sick community members.</li> <li>- Engagement of trusted and respected community leaders was also crucial to mounting an effective community response to the emergency.</li> <li>- TBAs played an important role in supporting maternal health and traditional healers gained increased prominence as trust in health workers diminished, often performing their duties without adequate infection protection.</li> </ul> |
|--------|--------------------------------------------------------------|------|-------------------------------------------------------------------------------------|--------|-----|--------|--------|------------------|--------------------|--------------------------------------------------------------------|----------------------------------------------------------------------------------------------------------------------------------------------------------------------------------------------------------|--------------------------------------------------------|----------------------------------------------------------------------------------------|--------------------------------------------------------------------------------------------------------------------------------------------------------------------------------------------------------------------------------------------------------------------------------------------------------------------------------------------------------------------------------------------------------------------------------------------------------------------------------------------------------------------------------------------------------------------------------------------------------------------------------------------------------------------------------------------------------------------------------------------------------------------------------------------------------------------------------------------------------------------------------------------------------------------------------------------------------------------------------------------------------------------------------------------------------------------------------------------------------------------------------------------------------------------------------------------------------------------------------------------|

|        |                                                               |      |                                               |        |     |        |         |                  |                    |                                                                    |                                                                                                                                                                                                          |                                                                   |                                                                                        |                                                                                                                                                                                                                                                                                                                                                                                                                                                                                                                                                                                                                                                                                                                                                                                                                                                                                                                                                                                                                                                                                                                                                                                                                                                                                                                                                                                                                                                                                                                                                                                                                                                                                                                                                                                                                                                                                                                                                                                                                                                       |
|--------|---------------------------------------------------------------|------|-----------------------------------------------|--------|-----|--------|---------|------------------|--------------------|--------------------------------------------------------------------|----------------------------------------------------------------------------------------------------------------------------------------------------------------------------------------------------------|-------------------------------------------------------------------|----------------------------------------------------------------------------------------|-------------------------------------------------------------------------------------------------------------------------------------------------------------------------------------------------------------------------------------------------------------------------------------------------------------------------------------------------------------------------------------------------------------------------------------------------------------------------------------------------------------------------------------------------------------------------------------------------------------------------------------------------------------------------------------------------------------------------------------------------------------------------------------------------------------------------------------------------------------------------------------------------------------------------------------------------------------------------------------------------------------------------------------------------------------------------------------------------------------------------------------------------------------------------------------------------------------------------------------------------------------------------------------------------------------------------------------------------------------------------------------------------------------------------------------------------------------------------------------------------------------------------------------------------------------------------------------------------------------------------------------------------------------------------------------------------------------------------------------------------------------------------------------------------------------------------------------------------------------------------------------------------------------------------------------------------------------------------------------------------------------------------------------------------------|
| Miller | Community health workers during the Ebola outbreak in Liberia | 2017 | Anthrologica, United Nations Children's Fund, | Report | N/A | Africa | Liberia | Disease outbreak | General population | Child health, maternal health, newborn health, infectious diseases | Treatment of childhood pneumonia, diarrhea, and malaria; health education; malnutrition screening; immunization; infectious disease control; postnatal visits; monitoring and referral of pregnant women | General community health volunteers, trained traditional midwives | Qualitative interviews, focus group discussions, analysis of quantitative program data | <ul style="list-style-type: none"> <li>- During the Ebola outbreak, many community-based MNCH services in 'hard hit' or 'hotspot' communities were largely discontinued.</li> <li>- Confusion over the intent and practical implementation of the 'no touch policy' was also highlighted by study participants as a key factor in the discontinuation of MNCH services, and many interpreted the policy as an instruction to cease ICCM entirely.</li> <li>- During the height of the outbreak, TTMs were often the only source of care available to women in need of assistance during pregnancy or delivery, largely because health facilities were closed, health workers refused care for pregnant and delivering women, and women were frightened of seeking care from health workers. However, TTMs were not provided with materials to perform community-based deliveries during the outbreak, nor were they given materials for enhanced infection prevention control (IPC), despite their high-risk work.</li> <li>- Caregivers concluded that despite their fear, they were more willing to seek care at health facilities on the recommendation of 'strong' gCHVs who they had known before the outbreak.</li> <li>- Community members also became more willing to follow the health advice of gCHVs after they had experienced their neighbours dying in the community from Ebola.</li> <li>- CHVs shifted into new roles to perform a wide variety of activities in the response including social mobilisation, contact tracing, active case finding and caretaking.</li> <li>- Many respondents in the study confirmed that the role of CHVs during the Ebola response was central to building trust between communities and the responders, government and health system.</li> <li>- Communities with a CHDC in place prior to the Ebola outbreak appeared to be more resilient, were better able to rapidly mobilize trusted local personnel, and were more likely to self-mobilize and organised community-led solutions.</li> </ul> |
|--------|---------------------------------------------------------------|------|-----------------------------------------------|--------|-----|--------|---------|------------------|--------------------|--------------------------------------------------------------------|----------------------------------------------------------------------------------------------------------------------------------------------------------------------------------------------------------|-------------------------------------------------------------------|----------------------------------------------------------------------------------------|-------------------------------------------------------------------------------------------------------------------------------------------------------------------------------------------------------------------------------------------------------------------------------------------------------------------------------------------------------------------------------------------------------------------------------------------------------------------------------------------------------------------------------------------------------------------------------------------------------------------------------------------------------------------------------------------------------------------------------------------------------------------------------------------------------------------------------------------------------------------------------------------------------------------------------------------------------------------------------------------------------------------------------------------------------------------------------------------------------------------------------------------------------------------------------------------------------------------------------------------------------------------------------------------------------------------------------------------------------------------------------------------------------------------------------------------------------------------------------------------------------------------------------------------------------------------------------------------------------------------------------------------------------------------------------------------------------------------------------------------------------------------------------------------------------------------------------------------------------------------------------------------------------------------------------------------------------------------------------------------------------------------------------------------------------|

|        |                                                                    |      |                                               |        |     |        |              |                  |                    |                                                                    |                                                                                                                                                                                                          |                                                        |                                                                                        |                                                                                                                                                                                                                                                                                                                                                                                                                                                                                                                                                                                                                                                                                                                                                                                                                                                                                                                                                                                                                                                                                                                                                                                                                                                                                                                                                                                                                                                                                                                                                                                                                                                                                                                                                                                                                                                                                                                                                                                                                                                                                                                                                                                                                                                              |
|--------|--------------------------------------------------------------------|------|-----------------------------------------------|--------|-----|--------|--------------|------------------|--------------------|--------------------------------------------------------------------|----------------------------------------------------------------------------------------------------------------------------------------------------------------------------------------------------------|--------------------------------------------------------|----------------------------------------------------------------------------------------|--------------------------------------------------------------------------------------------------------------------------------------------------------------------------------------------------------------------------------------------------------------------------------------------------------------------------------------------------------------------------------------------------------------------------------------------------------------------------------------------------------------------------------------------------------------------------------------------------------------------------------------------------------------------------------------------------------------------------------------------------------------------------------------------------------------------------------------------------------------------------------------------------------------------------------------------------------------------------------------------------------------------------------------------------------------------------------------------------------------------------------------------------------------------------------------------------------------------------------------------------------------------------------------------------------------------------------------------------------------------------------------------------------------------------------------------------------------------------------------------------------------------------------------------------------------------------------------------------------------------------------------------------------------------------------------------------------------------------------------------------------------------------------------------------------------------------------------------------------------------------------------------------------------------------------------------------------------------------------------------------------------------------------------------------------------------------------------------------------------------------------------------------------------------------------------------------------------------------------------------------------------|
| Miller | Community health workers during the Ebola outbreak in Sierra Leone | 2017 | Anthrologica, United Nations Children's Fund, | Report | N/A | Africa | Sierra Leone | Disease outbreak | General population | Child health, maternal health, newborn health, infectious diseases | Treatment of childhood pneumonia, diarrhea, and malaria; health education; malnutrition screening; immunization; infectious disease control; postnatal visits; monitoring and referral of pregnant women | Community health workers, traditional birth attendants | Qualitative interviews, focus group discussions, analysis of quantitative program data | <ul style="list-style-type: none"> <li>- Participants gave numerous reasons for the withdrawal or reduction of iCCM services, including CHWs' fear or lack of confidence in their ability to provide services safely without becoming infected; preoccupation with or reorientation towards Ebola-related activities; lack of support for the continuation of routine services; and because of a clear directive from an implementing partner or supervising health facility.</li> <li>- Several months after the start of the outbreak, CHWs were trained on a revised 'no touch' iCCM protocol. The policy was widely supported by service providers, yet a number of district- and national-level stakeholders engaged in this study conceded that it had been introduced too late in the response and only after a number of CHWs had died after being infected by Ebola during the course of their work.</li> <li>- Quantitative programme data from the four counties show that iCCM treatments and malnutrition screening declined from the early period of the outbreak in June 2014. However, services did continue at a reduced level. iCCM services started to recover around November 2014.</li> <li>- TBAs played an important role during the Ebola outbreak, monitoring pregnant women in their communities and accompanying them to the health facility for delivery if possible.</li> <li>- The long established close and trusting relationship between communities and their CHWs was significantly more resilient than the relationship communities had with facility-based health workers.</li> <li>- CHWs were slow to be included in the formal response, and in the early phases of the response, there was no formal coordination of CHWs.</li> <li>- Informally CHWs functioned as 'caregivers' in their communities bringing food and water to quarantined families, supporting the sick whilst awaiting the ambulance, and encouraging those who were afraid to attend health facilities. More formally, CHWs primarily contributed to the Surveillance Pillar as contact tracers and 'case finders' providing community events based surveillance. They also worked on social mobilisation and community engagement.</li> </ul> |
|--------|--------------------------------------------------------------------|------|-----------------------------------------------|--------|-----|--------|--------------|------------------|--------------------|--------------------------------------------------------------------|----------------------------------------------------------------------------------------------------------------------------------------------------------------------------------------------------------|--------------------------------------------------------|----------------------------------------------------------------------------------------|--------------------------------------------------------------------------------------------------------------------------------------------------------------------------------------------------------------------------------------------------------------------------------------------------------------------------------------------------------------------------------------------------------------------------------------------------------------------------------------------------------------------------------------------------------------------------------------------------------------------------------------------------------------------------------------------------------------------------------------------------------------------------------------------------------------------------------------------------------------------------------------------------------------------------------------------------------------------------------------------------------------------------------------------------------------------------------------------------------------------------------------------------------------------------------------------------------------------------------------------------------------------------------------------------------------------------------------------------------------------------------------------------------------------------------------------------------------------------------------------------------------------------------------------------------------------------------------------------------------------------------------------------------------------------------------------------------------------------------------------------------------------------------------------------------------------------------------------------------------------------------------------------------------------------------------------------------------------------------------------------------------------------------------------------------------------------------------------------------------------------------------------------------------------------------------------------------------------------------------------------------------|

|        |                                                                                                                                          |      |                                                         |                 |                            |                 |         |          |                    |                 |                                                                                                                         |                                        |                             |                                                                                                                                                                                                                                                                                                                                                                                                                                                                                                                                                                                                                                                                                                                                                                                                                                                                                                                                                                                                                                                                                                |
|--------|------------------------------------------------------------------------------------------------------------------------------------------|------|---------------------------------------------------------|-----------------|----------------------------|-----------------|---------|----------|--------------------|-----------------|-------------------------------------------------------------------------------------------------------------------------|----------------------------------------|-----------------------------|------------------------------------------------------------------------------------------------------------------------------------------------------------------------------------------------------------------------------------------------------------------------------------------------------------------------------------------------------------------------------------------------------------------------------------------------------------------------------------------------------------------------------------------------------------------------------------------------------------------------------------------------------------------------------------------------------------------------------------------------------------------------------------------------------------------------------------------------------------------------------------------------------------------------------------------------------------------------------------------------------------------------------------------------------------------------------------------------|
| Minden | Midwives for refugees                                                                                                                    | 1997 | American Refugee Committee                              | Journal article | World Health               | South-East Asia | Myanmar | Conflict | Camp               | Maternal health | Treatment of common illnesses (not specified), provision of contraceptives, newborn growth monitoring, health education | Community health workers, MCH midwives | Documentation of experience | <ul style="list-style-type: none"> <li>- Due to the high numbers of baby deaths and other conditions in which child bearing women suffered, female CHWs were selected to be a part of a special training in maternal health.</li> </ul>                                                                                                                                                                                                                                                                                                                                                                                                                                                                                                                                                                                                                                                                                                                                                                                                                                                        |
| Miyake | Community midwifery initiatives in fragile and conflict-affected countries: a scoping review of approaches from recruitment to retention | 2017 | London School of Hygiene and Tropical Medicine, Jhpiego | Journal article | Health Policy and Planning | Various         | Various | Conflict | General population | Maternal health | Assisted home delivery, health education                                                                                | Community midwives                     | Literature review           | <ul style="list-style-type: none"> <li>- Community nomination of candidates was credited with facilitating community acceptance.</li> <li>- As the CMW cadre worked closely with communities, CMWs provided services beyond midwifery, such as health promotion, child health and broader reproductive health issues.</li> <li>- Common challenges to training and implementation included lacking funding, trainers, equipment, and other materials.</li> <li>- Insecurity caused challenges in recruitment, retention, the ability of CMWs to travel to households, and supervision.</li> <li>- Reasons for leaving the CMW position included family opposition to deployment, overwhelming responsibilities beyond midwifery duties, discrimination, lack of incentives, spouse relocation, and seeking better paid/urban employment.</li> <li>- CMW candidate eligibility was problematic because of women's limited access to education.</li> <li>- Receiving education and an independent income was noted as contributing to women's empowerment and improved social status.</li> </ul> |

|         |                                                                                                                                                                                   |      |                                                                                                                                                                                                   |                 |               |                 |         |          |                    |                 |                                                                                                                          |                                                                           |                                           |                                                                                                                                                                                                                                                                                                                                                                                                                                                                                                                                                                                                                                                                                                                                                                                                                                                                                                                                                                                                                                                                                                                                                                                                                   |
|---------|-----------------------------------------------------------------------------------------------------------------------------------------------------------------------------------|------|---------------------------------------------------------------------------------------------------------------------------------------------------------------------------------------------------|-----------------|---------------|-----------------|---------|----------|--------------------|-----------------|--------------------------------------------------------------------------------------------------------------------------|---------------------------------------------------------------------------|-------------------------------------------|-------------------------------------------------------------------------------------------------------------------------------------------------------------------------------------------------------------------------------------------------------------------------------------------------------------------------------------------------------------------------------------------------------------------------------------------------------------------------------------------------------------------------------------------------------------------------------------------------------------------------------------------------------------------------------------------------------------------------------------------------------------------------------------------------------------------------------------------------------------------------------------------------------------------------------------------------------------------------------------------------------------------------------------------------------------------------------------------------------------------------------------------------------------------------------------------------------------------|
| Mullany | Impact of Community-Based Maternal Health Workers on Coverage of Essential Maternal Health Interventions among Internally Displaced Communities in Eastern Burma: The MOM Project | 2010 | Johns Hopkins Center for Public Health and Human Rights, UCLA School of Medicine, Global Health Access Program, Burma Medical Association, Karen Department of Health and Welfare, Mae Tao Clinic | Journal article | PLOS Medicine | South-East Asia | Myanmar | Conflict | General population | Maternal health | Emergency obstetric care, blood transfusion, antenatal care, postnatal care, counseling and provision of family planning | Maternal health workers, lay health workers, traditional birth attendants | Pre-post household surveys, no comparison | <ul style="list-style-type: none"> <li>- Non-resident MHWs provided essential maternal health interventions including emergency obstetric care.</li> <li>- MHWs provided five of the six components of basic emergency obstetric care, plus blood transfusion.</li> <li>- MHWs trained and worked with less skilled lay health workers and TBAs, who were closer to the community than MHWs and provided less technical services.</li> <li>- MHWs were able to provide, at the community level, services normally considered feasible only in facility-based settings.</li> <li>- Women mostly delivered at home (82.9%), or at one of the mobile locations (12.0%) set up by the MHWs and hospital delivery was rare (4.2%).</li> <li>- 44% of women reported that their delivery was attended by a MHW.</li> <li>- Attendance at birth by those trained to deliver elements of emergency obstetric care, antenatal care, postnatal care, use of modern contraceptives, urine testing, malaria screening, and deworming all increased substantially and significantly between baseline and endline.</li> <li>- Security-related obstacles prevented MHWs from reaching a higher number of deliveries.</li> </ul> |
|---------|-----------------------------------------------------------------------------------------------------------------------------------------------------------------------------------|------|---------------------------------------------------------------------------------------------------------------------------------------------------------------------------------------------------|-----------------|---------------|-----------------|---------|----------|--------------------|-----------------|--------------------------------------------------------------------------------------------------------------------------|---------------------------------------------------------------------------|-------------------------------------------|-------------------------------------------------------------------------------------------------------------------------------------------------------------------------------------------------------------------------------------------------------------------------------------------------------------------------------------------------------------------------------------------------------------------------------------------------------------------------------------------------------------------------------------------------------------------------------------------------------------------------------------------------------------------------------------------------------------------------------------------------------------------------------------------------------------------------------------------------------------------------------------------------------------------------------------------------------------------------------------------------------------------------------------------------------------------------------------------------------------------------------------------------------------------------------------------------------------------|

|           |                                                                                                               |      |                                                                                                                                               |                  |                                                                      |                       |         |          |                    |                 |                                                                                                                          |                                                                           |                             |                                                                                                                                                                                                                                                                                                                                                                                                                                                                                                                                                                                                                                                                                                                                                                                                                                                                                                                                                                                                                                                                                                                                                                                                                                                                                                                                       |
|-----------|---------------------------------------------------------------------------------------------------------------|------|-----------------------------------------------------------------------------------------------------------------------------------------------|------------------|----------------------------------------------------------------------|-----------------------|---------|----------|--------------------|-----------------|--------------------------------------------------------------------------------------------------------------------------|---------------------------------------------------------------------------|-----------------------------|---------------------------------------------------------------------------------------------------------------------------------------------------------------------------------------------------------------------------------------------------------------------------------------------------------------------------------------------------------------------------------------------------------------------------------------------------------------------------------------------------------------------------------------------------------------------------------------------------------------------------------------------------------------------------------------------------------------------------------------------------------------------------------------------------------------------------------------------------------------------------------------------------------------------------------------------------------------------------------------------------------------------------------------------------------------------------------------------------------------------------------------------------------------------------------------------------------------------------------------------------------------------------------------------------------------------------------------|
| Mullany   | The MOM Project: Delivering Maternal Health Services among Internally Displaced Populations in Eastern Burma  | 2008 | Johns Hopkins Center for Public Health and Human Rights, Global Health Access Program, Karen Department of Health and Welfare, Mae Tao Clinic | Journal article  | Reproductive Health Matters                                          | South-East Asia       | Myanmar | Conflict | General population | Maternal health | Emergency obstetric care, blood transfusion, antenatal care, postnatal care, counseling and provision of family planning | Maternal health workers, lay health workers, traditional birth attendants | Documentation of experience | <ul style="list-style-type: none"> <li>- Non-resident MHWs provided essential maternal health interventions including emergency obstetric care.</li> <li>- MHWs provided five of the six components of basic emergency obstetric care, plus blood transfusion.</li> <li>- MHWs trained and worked with less skilled lay health workers and TBAs, who were closer to the community than MHWs and provided less technical services.</li> <li>- MHWs were able to provide, at the community level, services normally considered feasible only in facility-based settings.</li> <li>- MHWs were trained in Thailand and then trained the lay health workers and TBAs in the communities.</li> <li>- Supervision of the lay health workers and TBAs was carried out by the MHWs. MHWs received supervision from team leaders in Myanmar and during annual follow-up trainings in Thailand.</li> <li>- Using local data collectors for data collection for monitoring and evaluation activities was crucial for access and community acceptance.</li> <li>- Military conflict and intervention hindered coordination of activities and supplies, along with training of MHWs.</li> <li>- However, some continuity was maintained because local health workers moved with displaced populations and continued providing services.</li> </ul> |
| Muneghina | From individual to collective healing                                                                         | 2014 | War Trauma Foundation                                                                                                                         | Magazine article | Therapy Today                                                        | Eastern Mediterranean | Sudan   | Conflict | General population | Mental health   | Psychosocial support                                                                                                     | Community-based social workers                                            | Documentation of experience | <ul style="list-style-type: none"> <li>- Community-based social workers were trained to provide psychosocial support in communities through narrative theater and individual psychosocial counseling.</li> </ul>                                                                                                                                                                                                                                                                                                                                                                                                                                                                                                                                                                                                                                                                                                                                                                                                                                                                                                                                                                                                                                                                                                                      |
| Murad     | Prehospital trauma care reduces mortality. Ten year results from a time-cohort and trauma audit study in Iraq | 2012 | Trauma Care Foundation Iraq, University of Tromso, Norwegian School of Veterinary Science, University Hospital North Norway                   | Journal article  | Scandinavian Journal of Trauma, Resuscitation and Emergency Medicine | Eastern Mediterranean | Iraq    | Conflict | General population | Trauma          | Trauma care                                                                                                              | Lay trauma first responders                                               | Cohort study                | <ul style="list-style-type: none"> <li>- Lay trauma first responders were trained to provide basic life support measures for trauma.</li> <li>- Improved response time because of lay trauma first responders may have contributed to improved survival.</li> </ul>                                                                                                                                                                                                                                                                                                                                                                                                                                                                                                                                                                                                                                                                                                                                                                                                                                                                                                                                                                                                                                                                   |
| Murad     | Trained Lay First Responders Reduce Trauma Mortality: A Controlled Study of Rural Trauma in Iraq              | 2010 | Trauma Care Foundation Iraq, Suleimaniah Institute of Clinical Medicine, University of Tromsoe, University Hospital North Norway              | Journal article  | Prehospital and Disaster Medicine                                    | Eastern Mediterranean | Iraq    | Conflict | General population | Trauma          | Trauma care                                                                                                              | Lay trauma first responders                                               | Quasi-experimental study    | <ul style="list-style-type: none"> <li>- Lay trauma first responders were trained to provide basic life support measures for trauma.</li> <li>- The mortality rate was significantly lower among patients initially managed in-field by first responders compared to patients without first-responder support.</li> <li>- Trained layperson first responders improve trauma outcomes where prehospital evacuation times are long.</li> </ul>                                                                                                                                                                                                                                                                                                                                                                                                                                                                                                                                                                                                                                                                                                                                                                                                                                                                                          |



|            |                                                                                                                                                 |      |                                                                                                          |                 |                             |                       |             |                  |                          |                                                                                     |                                                                                                                                                                                                                                     |                                                                               |                                                                                                 |                                                                                                                                                                                                                                                                                                                                                                                                                                                                                                                                                                                                                                                                                                                                                                         |
|------------|-------------------------------------------------------------------------------------------------------------------------------------------------|------|----------------------------------------------------------------------------------------------------------|-----------------|-----------------------------|-----------------------|-------------|------------------|--------------------------|-------------------------------------------------------------------------------------|-------------------------------------------------------------------------------------------------------------------------------------------------------------------------------------------------------------------------------------|-------------------------------------------------------------------------------|-------------------------------------------------------------------------------------------------|-------------------------------------------------------------------------------------------------------------------------------------------------------------------------------------------------------------------------------------------------------------------------------------------------------------------------------------------------------------------------------------------------------------------------------------------------------------------------------------------------------------------------------------------------------------------------------------------------------------------------------------------------------------------------------------------------------------------------------------------------------------------------|
| Nahimana   | Knowledge, attitude and practice of hygiene and sanitation in a Burundian refugee camp: implications for control of a Salmonella typhi outbreak | 2017 | World Health Organization, Rwanda Biomedical Center, University of Rwanda School of Public Health, UNHCR | Journal article | Pan African Medical Journal | Africa                | Rwanda      | Disease outbreak | Camp                     | Infectious diseases                                                                 | Hygiene education                                                                                                                                                                                                                   | Community health workers, community hygiene promoters                         | Household survey                                                                                | - CHWs and community hygiene promoters poor knowledge and skills because of inadequate training, which contributed to poor knowledge about disease prevention among the refugees and to disease outbreaks.                                                                                                                                                                                                                                                                                                                                                                                                                                                                                                                                                              |
| Najafizada | Community health workers of Afghanistan: a qualitative study of a national program                                                              | 2014 | University of Ottawa                                                                                     | Journal article | Conflict and Health         | Eastern Mediterranean | Afghanistan | Conflict         | General population       | Maternal health, newborn health, child health, reproductive health, nutrition, WASH | Health education; immunization; treatment of pneumonia, diarrhea, and anemia; promotion of skilled birth attendance; postnatal visits; distribution of contraceptives; first aid; vitamin A supplementation                         | Community health workers                                                      | Document analysis, qualitative interviews, focus group discussions, non-participant observation | - Different roles for male and female CHWs were not delineated in national policy, but in practice male and female CHWs tended to carry out different tasks, with women focused more on maternal and child health.<br>- Being a CHWs empowered women by increasing their social status and allowing them greater mobility. However, few women were CHW supervisors or in managerial or policy-making positions.<br>- Drug shortages were a major barrier to service provision and stockouts led to a lack of trust in CHW services. Areas supported by NGOs were less likely to experience stockouts.<br>- Community involvement in the community health program, through village health councils, were an important facilitator that allowed CHWs to work effectively. |
| Nawaz      | The role of Community Health Workers in the heart of crisis                                                                                     | 2017 | FHI360                                                                                                   | Web blog        | N/A                         | Africa                | Nigeria     | Conflict         | General population, camp | Child health, maternal health                                                       | Treatment of minor ailments (not specified), referral for antenatal care, labor and delivery and family planning services (not specified), health education, hygiene promotion, disease surveillance, distribution of mosquito nets | Community health extension workers, environmental health assistant volunteers | Documentation of experience                                                                     | - Community health extension workers and environmental health assistant volunteers were trained to treat minor ailments; refer women for antenatal care, labor and delivery, or family planning services; provide health education; conduct hygiene promotion; carry out disease surveillance; and distribute mosquito nets in communities and IDP camps.                                                                                                                                                                                                                                                                                                                                                                                                               |

|            |                                                                                                                    |      |                                                                                                                                    |                 |                                       |                       |                 |          |                          |                                                                                     |                                                                                                                                                                                                             |                                                        |                                                                                                                         |                                                                                                                                                                                                                                                                                                                                                                                                                                                                                                                                                                                                                      |
|------------|--------------------------------------------------------------------------------------------------------------------|------|------------------------------------------------------------------------------------------------------------------------------------|-----------------|---------------------------------------|-----------------------|-----------------|----------|--------------------------|-------------------------------------------------------------------------------------|-------------------------------------------------------------------------------------------------------------------------------------------------------------------------------------------------------------|--------------------------------------------------------|-------------------------------------------------------------------------------------------------------------------------|----------------------------------------------------------------------------------------------------------------------------------------------------------------------------------------------------------------------------------------------------------------------------------------------------------------------------------------------------------------------------------------------------------------------------------------------------------------------------------------------------------------------------------------------------------------------------------------------------------------------|
| Naziri     | Scaling up newborn care in Afghanistan: opportunities and challenges for the health sector                         | 2018 | United Nations Children's Fund Afghanistan, Afghanistan Ministry of Public Health, U.S Agency for International Development        | Journal article | Health Policy and Planning            | Eastern Mediterranean | Afghanistan     | Conflict | General population       | Maternal health, newborn health, child health, reproductive health, nutrition, WASH | Health education; immunization; treatment of pneumonia, diarrhea, and anemia; promotion of skilled birth attendance; postnatal visits; distribution of contraceptives; first aid; vitamin A supplementation | Community health workers                               | Literature review, analysis of survey data                                                                              | <ul style="list-style-type: none"> <li>- CHWs in Afghanistan provided basic health education and simple medical treatment since being trained and deployed in Afghanistan.</li> <li>- Female CHWs accomplished MNCH tasks more easily than male CHWs.</li> <li>- Insecurity and traditional attitudes to gender in Afghanistan make it difficult to attract and retain female health workers.</li> <li>- Community participation facilitated the tasks of CHWs, but also posed challenges, such as traditional leaders influencing the recruitment of CHWs who may not be the most appropriate candidate.</li> </ul> |
| Newbrander | Compliance with referral of sick children: a survey in five districts of Afghanistan                               | 2012 | Management Sciences for Health, Lawndale Christian Health Center, United Nations Children's Fund                                   | Journal article | BMC Pediatrics                        | Eastern Mediterranean | Afghanistan     | Conflict | General population       | Child health                                                                        | Assessment, management, and referral of sick children (not specified)                                                                                                                                       | Community health workers                               | Household survey                                                                                                        | <ul style="list-style-type: none"> <li>- The majority of children brought to a CHW were referred to another healthcare provider, which may indicate a lack of confidence to treat uncomplicated illnesses.</li> <li>- Caretakers were more likely to comply with referral recommendations from community members (relative, friend, CHW, traditional healer) than with recommendations from health workers.</li> </ul>                                                                                                                                                                                               |
| O'Brien    | Provision of antiretroviral treatment in conflict settings: the experience of Médecins Sans Frontières             | 2010 | Médecins Sans Frontières, Geelong Hospital, Royal Melbourne Hospital, Red Cross Children's Hospital, University of Auckland        | Journal article | Conflict and Health                   | Not specified         | Not specified   | Conflict | General population, camp | Infectious diseases                                                                 | HIV counseling and adherence monitoring                                                                                                                                                                     | Community health workers                               | Documentation of experience                                                                                             | <ul style="list-style-type: none"> <li>- CHWs were trained to provide HIV counseling and adherence monitoring.</li> </ul>                                                                                                                                                                                                                                                                                                                                                                                                                                                                                            |
| O'Heir     | Pregnancy and childbirth care following conflict and displacement: care for refugee women in low-resource settings | 2004 | N/A                                                                                                                                | Journal article | Journal of Midwifery & Women's Health | Africa                | Kenya, Tanzania | Conflict | General population, camp | Maternal health                                                                     | Antenatal care, assisted home delivery                                                                                                                                                                      | Traditional birth attendants                           | Documentation of experience                                                                                             | <ul style="list-style-type: none"> <li>- In refugee settings in Tanzania and Kenya, the majority of deliveries are attended by trained TBAs.</li> </ul>                                                                                                                                                                                                                                                                                                                                                                                                                                                              |
| Ohly       | Developing health service delivery in a poor and marginalised community in North West Pakistan                     | 2018 | Abaseen Foundation, Institute of Public Health, Lady Reading Hospital, University of Central Lancashire, Khyber Medical University | Journal article | Pakistan Journal of Medical Sciences  | Eastern Mediterranean | Pakistan        | Conflict | General population       | Maternal health, child health, reproductive health                                  | Health education, referral for ANC                                                                                                                                                                          | Community health workers, traditional birth attendants | Documentation of experience, pre-post household surveys, analysis of routine quantitative data, focus group discussions | <ul style="list-style-type: none"> <li>- Volunteer staff promoted health awareness and health education within the community.</li> <li>- Trust was developed through engagement with village health committees and heads of households, which enabled pregnant women to attend the health center.</li> </ul>                                                                                                                                                                                                                                                                                                         |

|                    |                                                                                                                                                                                                                                           |      |                                                                                                |                 |                                        |          |          |                  |                    |                     |                                                                                                          |                                    |                                             |                                                                                                                                                                                                                                                                                                                                                                                                                                                                                                                                                                                                                                                                                                                                                                                                                  |
|--------------------|-------------------------------------------------------------------------------------------------------------------------------------------------------------------------------------------------------------------------------------------|------|------------------------------------------------------------------------------------------------|-----------------|----------------------------------------|----------|----------|------------------|--------------------|---------------------|----------------------------------------------------------------------------------------------------------|------------------------------------|---------------------------------------------|------------------------------------------------------------------------------------------------------------------------------------------------------------------------------------------------------------------------------------------------------------------------------------------------------------------------------------------------------------------------------------------------------------------------------------------------------------------------------------------------------------------------------------------------------------------------------------------------------------------------------------------------------------------------------------------------------------------------------------------------------------------------------------------------------------------|
| Oladele            | An assessment of the emergency response among health workers involved in the 2010 cholera outbreak in northern Nigeria                                                                                                                    | 2012 | Nigerian Institute of Medical Research, Nigeria Federal Ministry of Health                     | Journal article | Journal of Infection and Public Health | Africa   | Nigeria  | Disease outbreak | General population | Infectious diseases | Referral to health facilities                                                                            | Community health extension workers | Health worker survey                        | <ul style="list-style-type: none"> <li>– Healthcare workers (most of whom were CHWs) reported lack of funding, resources, supplies, and training hindering them from patient case management.</li> <li>– Most of the healthcare workers involved in case management are either poorly trained or not trained at all.</li> <li>– Cases of cholera infection were reported in healthcare workers during the outbreak.</li> </ul>                                                                                                                                                                                                                                                                                                                                                                                   |
| Ongwae             | Use of Dedicated Mobile Teams and Polio Volunteer Community Mobilizers to Increase Access to Zero-Dose Oral Poliovirus Vaccine and Routine Childhood Immunizations in Settlements at High Risk for Polio Transmission in Northern Nigeria | 2017 | United Nations Children's Fund, World Health Organization, Nigeria Federal Ministry of Health, | Journal article | Journal of Infectious Diseases         | Africa   | Nigeria  | Conflict         | General population | Child health        | Conduct household microcensus, home visits, immunization, tracking and linking of newborns with facility | Volunteer community mobilizers     | Document review, pre-post household surveys | <ul style="list-style-type: none"> <li>– To address gaps in polio immunization coverage, mobile health teams and a network of volunteer community mobilizers were used to target settlements at high risk for polio transmission in northern Nigeria.</li> <li>– Volunteer community mobilizers conducted household microcensus, home visits, administration of oral polio vaccine, tracking and linking of newborns with routine services in the nearby health facilities.</li> <li>– The proportion of children fully immunized increased from 19% to 55% and the number of children receiving polio vaccine increased.</li> <li>– Community engagement involving traditional and religious leaders reduced resistance to the poliovirus vaccine and mobilized communities to utilize the services.</li> </ul> |
| Orach              | Maternal mortality estimated using the Sisterhood method in Gulu district, Uganda                                                                                                                                                         | 2000 | Makerere University                                                                            | Journal article | Tropical Doctor                        | Africa   | Uganda   | Conflict         | General population | Maternal health     | Assisted home delivery                                                                                   | Traditional birth attendants       | Household survey                            | <ul style="list-style-type: none"> <li>– About half of deliveries were attended by untrained TBAs and only a few deliveries were attended by trained TBAs.</li> <li>– A significant number of maternal deaths occurred at the homes of untrained TBAs. No deaths occurred at the homes of trained TBAs.</li> <li>– Training and support to TBAs can avert deaths in conflict settings.</li> </ul>                                                                                                                                                                                                                                                                                                                                                                                                                |
| Pacichana-Quinayáz | Common Elements Treatment Approach based on a Cognitive Behavioral Intervention: implementation in the Colombian Pacific                                                                                                                  | 2016 | Universidad del Valle                                                                          | Journal article | Ciência & Saúde Coletiva               | Americas | Colombia | Conflict         | General population | Mental health       | Psychosocial support                                                                                     | Lay psychosocial community workers | Qualitative interviews                      | <ul style="list-style-type: none"> <li>– LPCW were trained to provide a Common Elements Treatment Approach psychosocial support intervention for people displaced by conflict.</li> <li>– After implementation of CETA by LPCWs, victims reported improvements in their symptoms, including less anxiety and better feelings about the future.</li> <li>– Training LPCWs on mental health issues had positive findings due to low cost, greater availability, and adequate effectiveness in assisting and accompanying people with mental disorders.</li> </ul>                                                                                                                                                                                                                                                  |

|        |                                                                                                                                                       |      |                                                                                                                                                                                                                                                                                                                                                                                                                        |                 |                                  |                 |         |                  |                    |                                      |                                        |                              |                          |                                                                                                             |
|--------|-------------------------------------------------------------------------------------------------------------------------------------------------------|------|------------------------------------------------------------------------------------------------------------------------------------------------------------------------------------------------------------------------------------------------------------------------------------------------------------------------------------------------------------------------------------------------------------------------|-----------------|----------------------------------|-----------------|---------|------------------|--------------------|--------------------------------------|----------------------------------------|------------------------------|--------------------------|-------------------------------------------------------------------------------------------------------------|
| Parmar | Health and Human Rights in Eastern Myanmar after the Political Transition: A Population-Based Assessment Using Multistaged Household Cluster Sampling | 2015 | Brigham and Women's Hospital, Harvard Medical School, Community Partners International, University of Washington, Burma Medical Association, Health Information Systems Information Group, Back Pack Health Worker Team, Mae Tao Clinic, Karen Department of Health and Welfare, Karenni Mobile Health Committee, Mon National Health Committee, Harvard School of Public Health, University of California Los Angeles | Journal article | PLOS One                         | South-East Asia | Myanmar | Conflict         | General population | Maternal health, reproductive health | Antenatal care, assisted home delivery | Traditional birth attendants | Household survey         | - Ethnic minority TBAs addressed large delivery gaps and providing reproductive health to women in Myanmar. |
| Patel  | Ebola Outbreak in Nigeria: Increasing Ebola Knowledge of Volunteer Health Advisors                                                                    | 2016 | Healthy Sunrise Foundation, Global Solutions for Prevention, Education, Treatment, Training and Research, University of Nevada School of Medicine, University of Nevada, Las Vegas, Association of Nigeria Physicians in the Americas                                                                                                                                                                                  | Journal article | Global Journal of Health Science | Africa          | Nigeria | Disease outbreak | General population | Infectious diseases                  | Health education                       | Volunteer health advisors    | Pre-post knowledge tests | - VHAs' knowledge of Ebola improved after they received training.                                           |

|           |                                                                                                                                      |      |                                                                                                                                                                                                                                                                                                                                        |                     |                                                   |        |                                        |                  |                    |                     |                                                                                                                                    |                          |                                                                               |                                                                                                                                                                                                                                                                                                                                                                                                                                                                                                                                                                                                                                                                                                                                                                                                                                                                                                                                                                 |
|-----------|--------------------------------------------------------------------------------------------------------------------------------------|------|----------------------------------------------------------------------------------------------------------------------------------------------------------------------------------------------------------------------------------------------------------------------------------------------------------------------------------------|---------------------|---------------------------------------------------|--------|----------------------------------------|------------------|--------------------|---------------------|------------------------------------------------------------------------------------------------------------------------------------|--------------------------|-------------------------------------------------------------------------------|-----------------------------------------------------------------------------------------------------------------------------------------------------------------------------------------------------------------------------------------------------------------------------------------------------------------------------------------------------------------------------------------------------------------------------------------------------------------------------------------------------------------------------------------------------------------------------------------------------------------------------------------------------------------------------------------------------------------------------------------------------------------------------------------------------------------------------------------------------------------------------------------------------------------------------------------------------------------|
| Perry     | Community health worker programmes after the 2013–2016 Ebola outbreak                                                                | 2016 | Johns Hopkins Bloomberg School of Public Health, Brigham and Women's Hospital, Harvard Medical School, Columbia University, United Nations Children's Fund, Last Mile Health, Partners In Health, Sierra Leone Ministry of Health and Sanitation, Guinea Ministry of Health and Hygiene, Liberia Ministry of Health and Social Welfare | Journal article     | Bulletin of the World Health Organization         | Africa | Guinea, Liberia, Sierra Leone, Nigeria | Disease outbreak | General population | Infectious diseases | Case detection, contact tracing, health education, community sensitization, promotion of protective practices, and data collection | Community health workers | Documentation of experience                                                   | <ul style="list-style-type: none"> <li>– During the West Africa Ebola outbreak, CHWs carried out case detection, contact tracing, health education, community sensitization, promotion of protective practices, and data collection.</li> <li>– In Nigeria, CHWs who were normally engaged in polio eradication initiatives were rapidly redeployed to detect patients with Ebola virus and trace their contacts.</li> <li>– CHWs can help limit the spread of future outbreaks through early detection and rapid containment of cases. Community health workers are particularly important in remote villages or hard-to-reach populations, where people often live far from the nearest health facility. The identification of suspected cases by a community health worker can serve as an early warning system for disease outbreaks.</li> <li>– CHWs can play an important role in controlling outbreaks by engaging and educating communities.</li> </ul> |
| Pett      | Our community health workers are the MSF project                                                                                     | 2017 | Médecins Sans Frontières                                                                                                                                                                                                                                                                                                               | Web blog            | N/A                                               | Africa | South Sudan                            | Conflict         | General population | Child health        | Treatment of childhood diarrhea, malaria, and skin diseases                                                                        | Community health workers | Documentation of experience                                                   | <ul style="list-style-type: none"> <li>– When communities are displaced because of fighting, CHWs move with them and continue providing services.</li> </ul>                                                                                                                                                                                                                                                                                                                                                                                                                                                                                                                                                                                                                                                                                                                                                                                                    |
| Plucinski | Effect of the Ebola-virus-disease epidemic on malaria case management in Guinea, 2014: a cross-sectional survey of health facilities | 2015 | Centers for Disease Control and Prevention, President's Malaria Initiative, Guinea Ministry of Health, Mafèrinyah Rural Health Research Center, Catholic Relief Services, Emory University                                                                                                                                             | Journal article     | Lancet Infectious Diseases                        | Africa | Guinea                                 | Disease outbreak | General population | Child health        | Treatment of malaria                                                                                                               | Community health workers | Health facility survey, analysis of surveillance data, qualitative interviews | <ul style="list-style-type: none"> <li>– The number of patients treated for malaria during the Ebola outbreak decreased by 24% compared to the previous year. Overall HF attendance decreased by 11%.</li> <li>– The % of CHWs in Ebola-affected areas reported being active fell from 98% before the outbreak to 74% during the outbreak.</li> <li>– The % of CHWs doing malaria case management fell from 68% to 48%. Only 30% reported using RDTs, down from 70% before the outbreak.</li> </ul>                                                                                                                                                                                                                                                                                                                                                                                                                                                             |
| Plucinski | Ebola epidemic impedes malaria care delivery in Guinea                                                                               | 2015 | Centers for Disease Control and Prevention, Guinea Ministry of Health, Mafèrinyah Rural Health Research Center, Catholic Relief Services, Emory University                                                                                                                                                                             | Conference abstract | American Society of Tropical Medicine and Hygiene | Africa | Guinea                                 | Disease outbreak | General population | Child health        | Treatment of malaria                                                                                                               | Community health workers | Health facility survey, analysis of surveillance data, qualitative interviews | <ul style="list-style-type: none"> <li>– In Ebola-affected areas of Guinea, the number of patients treated with oral and injectable antimalarials during the Ebola outbreak decreased by 58% and 69%, respectively, compared to the previous year.</li> <li>– Overall health facility attendance decreased by 42% in Ebola-affected areas.</li> <li>– In Ebola-affected prefectures, only 74% of community health workers were operational, and only 48% of those working reported actively treating malaria cases.</li> </ul>                                                                                                                                                                                                                                                                                                                                                                                                                                  |

|         |                                                                                                                                                                                                                       |               |                                                                                                                                                                                                                                   |                 |                                             |                       |           |                            |                    |                                                          |                                                                   |                                                       |                                                            |                                                                                                                                                                                                                                                                                                                                                                                                                                    |
|---------|-----------------------------------------------------------------------------------------------------------------------------------------------------------------------------------------------------------------------|---------------|-----------------------------------------------------------------------------------------------------------------------------------------------------------------------------------------------------------------------------------|-----------------|---------------------------------------------|-----------------------|-----------|----------------------------|--------------------|----------------------------------------------------------|-------------------------------------------------------------------|-------------------------------------------------------|------------------------------------------------------------|------------------------------------------------------------------------------------------------------------------------------------------------------------------------------------------------------------------------------------------------------------------------------------------------------------------------------------------------------------------------------------------------------------------------------------|
| Plummer | Community health for Rwandan refugees                                                                                                                                                                                 | 1995          | Not specified                                                                                                                                                                                                                     | Journal article | The Canadian Nurse                          | Africa                | Rwanda    | Conflict, disease outbreak | Camp               | Infectious diseases                                      | Active case finding, distribution of ORS, health education        | Community health workers                              | Documentation of experience                                | <ul style="list-style-type: none"> <li>Community Health Workers (CHW), were trained in active case finding for patients with major illnesses and distributed ORS to patients suffering from dehydration.</li> <li>During a cholera outbreak, CHWs carried out active case finding and conducted a mass education campaign, which was seen as key to reducing mortality.</li> </ul>                                                 |
| Purdin  | Surveillance beyond Camp Settings in Humanitarian Emergencies: Findings from the Humanitarian Health Information Management Working Group                                                                             | 2009          | International Rescue Committee, United Nations High Commissioner for Refugees, Harvard School of Public Health, Brigham and Women's Hospital, Massachusetts General Hospital                                                      | Journal article | Prehospital and Disaster Medicine           | Various               | Various   | Various                    | General population | Infectious diseases                                      | Community-based surveillance                                      | Various                                               | Documentation of expert meeting                            | <ul style="list-style-type: none"> <li>Community volunteers/CHWs have been used to collect data on births, deaths, pregnancies, immunizations, and latrine use.</li> <li>The needs and resources required for community-based surveillance may be different for rural vs. urban, low-income vs. middle-income, and stable vs. unstable settings.</li> </ul>                                                                        |
| Rabadi  | A community health worker approach: Timed and targeted counseling improves caregiver knowledge and behaviors related to child nutrition and management of illness in emergency-affected areas of West Bank, Palestine | Not specified | World Vision                                                                                                                                                                                                                      | Web blog        | N/A                                         | Eastern Mediterranean | Palestine | Conflict                   | General population | Maternal health, newborn health, child health, nutrition | Behavior change communication, antenatal visits, postnatal visits | Community health workers                              | Pre-post household surveys                                 | <ul style="list-style-type: none"> <li>CHWs in emergency-affected areas of Palestine conducted household visits during and after pregnancy to delivery behavior change messages related to maternal and child health and nutrition.</li> <li>Exclusive breastfeeding, vitamin D supplementation, correct management of diarrhea, and supplementation with iron/folate during pregnancy all increased significantly.</li> </ul>     |
| Rahman  | Effect of a Multicomponent Behavioral Intervention in Adults Impaired by Psychological Distress in a Conflict-Affected Area of Pakistan                                                                               | 2016          | University of Liverpool, Human Development Research Foundation, Lady Reading Hospital, University of New South Wales, VU University Amsterdam, Liverpool School of Tropical Medicine, Keele University, World Health Organization | Journal article | Journal of the American Medical Association | Eastern Mediterranean | Pakistan  | Conflict                   | General population | Mental health                                            | Psychosocial support                                              | Lay health workers                                    | Randomized controlled trial                                | <ul style="list-style-type: none"> <li>Lay health workers were trained to provide psychosocial support to people experiencing psychological distress.</li> <li>After 3 months of treatment, the intervention group had significantly lower scores than the control group for anxiety, depression, posttraumatic, functional impairment, problems for which the person sought help, and symptoms of depressive disorder.</li> </ul> |
| Raoot   | Measles Outbreak in High Risk Areas of Delhi: Epidemiological Investigation and Laboratory Confirmation                                                                                                               | 2015          | Government of NCT Delhi, Maulana Azad Medical College                                                                                                                                                                             | Journal article | Indian Journal of Pediatrics                | South-East Asia       | India     | Disease outbreak           | General population | Infectious diseases                                      | Active case finding and containment                               | Accredited social health activists, Anganwadi workers | Documentation of experience, analysis of surveillance data | <ul style="list-style-type: none"> <li>CHWs were part of field health teams conducting active case finding and containment of cases during a measles outbreak.</li> </ul>                                                                                                                                                                                                                                                          |

|           |                                                                                                                                                      |      |                                                                                                                                                   |                 |                                           |                 |              |                  |                    |                                               |                                                                                                                                        |                                          |                                                                                                           |                                                                                                                                                                                                                                                                                                                                                                                                                                                                               |
|-----------|------------------------------------------------------------------------------------------------------------------------------------------------------|------|---------------------------------------------------------------------------------------------------------------------------------------------------|-----------------|-------------------------------------------|-----------------|--------------|------------------|--------------------|-----------------------------------------------|----------------------------------------------------------------------------------------------------------------------------------------|------------------------------------------|-----------------------------------------------------------------------------------------------------------|-------------------------------------------------------------------------------------------------------------------------------------------------------------------------------------------------------------------------------------------------------------------------------------------------------------------------------------------------------------------------------------------------------------------------------------------------------------------------------|
| Ratnayake | Assessment of Community Event-Based Surveillance for Ebola Virus Disease, Sierra Leone, 2015                                                         | 2016 | International Rescue Committee, Centers for Disease Control and Prevention, Action contre la Faim, Sierra Leone Ministry of Health and Sanitation | Journal article | Emerging Infectious Diseases              | Africa          | Sierra Leone | Disease outbreak | General population | Infectious diseases                           | Disease surveillance                                                                                                                   | Community health monitors                | Analysis of surveillance data                                                                             | <ul style="list-style-type: none"> <li>– Volunteer community health monitors were trained to detect 6 trigger events suggestive of Ebola virus transmission and report them to supervisors.</li> <li>– The CEBS system had relatively low sensitivity and low positive predictive value. However, it did detect a large number of deaths in the community as well as measles outbreaks.</li> </ul>                                                                            |
| Richters  | Sexual transgression and social disconnection: healing through community-based sociotherapy in Rwanda                                                | 2013 | Leiden University Medical Center, Amsterdam Institute for Social Science Research, Institute of Higher Education in Mental Health                 | Journal article | Culture, Health and Sexuality             | Africa          | Rwanda       | Conflict         | General population | Mental health                                 | Facilitation of sociotherapy group sessions                                                                                            | Group facilitators, community volunteers | Qualitative interviews, focus group discussions, participant observation, documentation of group sessions | <ul style="list-style-type: none"> <li>– Group facilitators, which include community volunteers, lead group sociotherapy sessions with victims of genocide and rape.</li> </ul>                                                                                                                                                                                                                                                                                               |
| Rodger    | DOTS-based tuberculosis treatment and control during civil conflict and an HIV epidemic, Churachandpur District, India                               | 2002 | Burnet Institute for Medical Research and Public Health, Society for HIV/AIDS Lifeline Operation in Manipur                                       | Journal article | Bulletin of the World Health Organization | South-East Asia | India        | Conflict         | General population | Infectious diseases                           | DOTS for TB                                                                                                                            | Community outreach workers               | Analysis of quantitative program data                                                                     | <ul style="list-style-type: none"> <li>– Community outreach workers treated patients with TB in a conflict setting.</li> <li>– There was a successful outcome of treatment in 89% of patients.</li> <li>– The use of outreach workers from each ethnic group was important in facilitating free access to all areas and patients.</li> <li>– Recognition by local leaders that TB was a major problem in their communities was also key to success of the program.</li> </ul> |
| Rosales   | Role of an international non-governmental organization in strengthening health systems in fragile-state context: Evaluation results from South Sudan | 2015 | World Vision                                                                                                                                      | Journal article | African Evaluation Journal                | Africa          | South Sudan  | Conflict         | General population | Maternal health, newborn health, child health | Treatment of childhood pneumonia, diarrhea, and malaria; home birth assistance; newborn care; health education; community mobilization | Home health promoters                    | Pre-post household surveys, qualitative interviews, focus group discussions, document analysis            | <ul style="list-style-type: none"> <li>– In South Sudan, an intervention delivered by CHWs improved key maternal and child health indicators in a fragile context.</li> <li>– The weakness of the government supply chain during the conflict forced the NGO to create a parallel supply chain.</li> </ul>                                                                                                                                                                    |
| Rosenberg | Let's talk about sex work in humanitarian settings: piloting a rights-based approach to working with refugee women selling sex in Kampala            | 2017 | AIDS Information Center of Uganda                                                                                                                 | Journal article | Reproductive Health Matters               | Africa          | Uganda       | Conflict         | General population | Sexual and reproductive health                | Health education                                                                                                                       | Peer educators                           | Qualitative interviews, focus group discussions                                                           | <ul style="list-style-type: none"> <li>– Refugee sex workers were trained as peer educators to provide education on sexual and reproductive health and GBV.</li> </ul>                                                                                                                                                                                                                                                                                                        |

|           |                                                                                                                                                                     |      |                                                                                                                                                                                                                                                |                 |                             |        |                          |                     |                    |                               |                                                                                                                                                                                                 |                                              |                                                        |                                                                                                                                                                                                                                                                                                                                                                                                                                                                                                                                                                                                                                                                                                                                                                                                                                                                       |
|-----------|---------------------------------------------------------------------------------------------------------------------------------------------------------------------|------|------------------------------------------------------------------------------------------------------------------------------------------------------------------------------------------------------------------------------------------------|-----------------|-----------------------------|--------|--------------------------|---------------------|--------------------|-------------------------------|-------------------------------------------------------------------------------------------------------------------------------------------------------------------------------------------------|----------------------------------------------|--------------------------------------------------------|-----------------------------------------------------------------------------------------------------------------------------------------------------------------------------------------------------------------------------------------------------------------------------------------------------------------------------------------------------------------------------------------------------------------------------------------------------------------------------------------------------------------------------------------------------------------------------------------------------------------------------------------------------------------------------------------------------------------------------------------------------------------------------------------------------------------------------------------------------------------------|
| Ruckstuhl | Malaria case management by community health workers in the Central African Republic from 2009–2014: overcoming challenges of access and instability due to conflict | 2017 | Swiss Tropical and Public Health Institute, University of Basel, Central African Republic National Malaria Control Programme, The MENTOR Initiative                                                                                            | Journal article | Malaria journal             | Africa | Central African Republic | Conflict            | General population | Maternal health, child health | Treatment of malaria, diarrhea, and helminth infection; health education; malnutrition screening and referral; vitamin A supplementation ; provision of home delivery kits; bednet distribution | Community health workers                     | Analysis of quantitative program data                  | <ul style="list-style-type: none"> <li>– CHWs treated large numbers of children and pregnant women in an area of periodic conflict and continued instability.</li> <li>– Register review showed that CHWs overwhelmingly provided appropriate treatment for malaria and unnecessary antimalarial treatment was minimal.</li> <li>– The CHW reporting rate fell from 95% to 70% during the peak of the conflict.</li> <li>– Supervisors were able to continue supervision and consistent drug supplies through periods of heightened conflict and insecurity.</li> <li>– CHWs were given extra buffer stock during the periods of increased insecurity.</li> <li>– However, supervision and other support to CHWs did decrease during the height of the crisis because expat staff were evacuated from the country and access to program funds was limited.</li> </ul> |
| Sabo      | Political violence and Eritrean health care                                                                                                                         | 1989 | University of Missouri-Columbia                                                                                                                                                                                                                | Journal article | Social Science and Medicine | Africa | Eritrea                  | Conflict            | General population | Not specified                 | Basic healthcare (not specified), health education                                                                                                                                              | Village health workers, traditional midwives | Documentation of experience                            | <ul style="list-style-type: none"> <li>– Village health workers and traditional midwives were trained to provide healthcare services in communities.</li> </ul>                                                                                                                                                                                                                                                                                                                                                                                                                                                                                                                                                                                                                                                                                                       |
| Sadler    | A comparison of the programme coverage of two therapeutic feeding interventions implemented in neighbouring districts of Malawi                                     | 2007 | Valid International, Institute of Child Health, University College London                                                                                                                                                                      | Journal article | Public Health Nutrition     | Africa | Malawi                   | Nutrition emergency | General population | Nutrition                     | Malnutrition screening and referral                                                                                                                                                             | Community health workers                     | Household surveys in intervention and comparison areas | <ul style="list-style-type: none"> <li>– CHWs were used for malnutrition screening and referral during a nutrition emergency.</li> <li>– Coverage of therapeutic feeding was substantially higher in the community-based program that included CHWs than in the facility-based program.</li> <li>– The community-based program also had more even coverage across the district, suggesting that the community-based model improved equity in access to services.</li> </ul>                                                                                                                                                                                                                                                                                                                                                                                           |
| Sami      | “You have to take action”: changing knowledge and attitudes towards newborn care practices during crisis in South Sudan                                             | 2017 | Johns Hopkins Bloomberg School of Public Health, Save the Children, US Centers for Disease Control and Prevention, United Nations Children’s Fund, University of the Western Cape, South Sudan Ministry of Health, International Medical Corps | Journal article | Reproductive Health Matters | Africa | South Sudan              | Conflict            | Camp               | Newborn health                | Newborn care, promotion of ANC, assisted home delivery                                                                                                                                          | Community health workers                     | Pre-post knowledge tests, qualitative interviews       | <ul style="list-style-type: none"> <li>– After receiving training, CHWs displayed higher levels of knowledge of newborn care practices and danger signs.</li> <li>– A challenge was social stigma related to disclosing pregnancy. CHWs expressed that establishing trust and educating women of reproductive age regarding benefits of ANC would result in early identification.</li> <li>– CHWs cited lack of staffing and prioritization as the main barriers to conducting timely home visits, particularly with competing activities such as vaccination campaigns or disease surveillance.</li> </ul>                                                                                                                                                                                                                                                           |



|          |                                                                                                                                                          |      |                                                                                                                                                                                                                                                |                 |                                    |                       |             |                            |                          |                           |                                                                                                                                              |                              |                                                                                                               |                                                                                                                                                                                                                                                                                                                                                                                                                                                                                                                                                                                                                                                                                                       |
|----------|----------------------------------------------------------------------------------------------------------------------------------------------------------|------|------------------------------------------------------------------------------------------------------------------------------------------------------------------------------------------------------------------------------------------------|-----------------|------------------------------------|-----------------------|-------------|----------------------------|--------------------------|---------------------------|----------------------------------------------------------------------------------------------------------------------------------------------|------------------------------|---------------------------------------------------------------------------------------------------------------|-------------------------------------------------------------------------------------------------------------------------------------------------------------------------------------------------------------------------------------------------------------------------------------------------------------------------------------------------------------------------------------------------------------------------------------------------------------------------------------------------------------------------------------------------------------------------------------------------------------------------------------------------------------------------------------------------------|
| Sami     | Understanding health systems to improve community and facility level newborn care among displaced populations in South Sudan: a mixed methods case study | 2018 | Johns Hopkins Bloomberg School of Public Health, Save the Children, South Sudan Ministry of Health, United Nations Children's Fund, University of the Western Cape, International Medical Corps, US Centers for Disease Control and Prevention | Journal article | BMC Pregnancy and Children         | Africa                | South Sudan | Conflict, disease outbreak | Camp                     | Newborn health            | Newborn care, promotion of ANC and facility delivery                                                                                         | Community health workers     | Qualitative interviews, focus group discussions, observation of health facilities                             | <ul style="list-style-type: none"> <li>- CHWs demonstrated motivation to implement newborn interventions. However, the failure to prioritize newborn activities among program supervisors was described as a key challenge.</li> <li>- CHWs were unable to reach all newborns for a postnatal home visit within the first 48h after birth because of competing priorities.</li> <li>- CHWs stated that a wide scope of work and few workers to cover the large populations were factors that limited time spent on newborn care.</li> <li>- A cholera outbreak and increase in GBV cases further increased CHWs' workloads, making it more difficult to carry out newborn care activities.</li> </ul> |
| Schaider | International Maternal Mortality Reduction: Outcome of Traditional Birth Attendant Education and Intervention in Angola                                  | 1999 | Cook County Hospital, International Medical Corps                                                                                                                                                                                              | Journal article | Journal of Medical Systems         | Africa                | Angola      | Conflict                   | General population       | Maternal health           | Antenatal care, postnatal care, assisted home delivery, immunization, registration of births and fetal and maternal deaths, health education | Traditional birth attendants | Analysis of quantitative program data                                                                         | <ul style="list-style-type: none"> <li>- TBAs were trained to provide antenatal, delivery, and postnatal care.</li> </ul>                                                                                                                                                                                                                                                                                                                                                                                                                                                                                                                                                                             |
| Seddiq   | Implementing a successful tuberculosis programme within primary care services in a conflict area using the stop TB strategy: Afghanistan case study      | 2014 | Afghanistan National TB Control Programme, International Union against Tuberculosis and Lung Disease, Stop-TB, Pakistan Health Services Academy, World Health Organization Regional Office for the Eastern Mediterranean                       | Journal article | Conflict and Health                | Eastern Mediterranean | Afghanistan | Conflict                   | General population       | Infectious diseases       | Treatment of TB                                                                                                                              | Community health workers     | Documentation of experience, literature review, qualitative interviews, analysis of quantitative program data | <ul style="list-style-type: none"> <li>- CHWs were trained to provide directly-observed treatment for TB and treatment follow-up.</li> </ul>                                                                                                                                                                                                                                                                                                                                                                                                                                                                                                                                                          |
| Sethi    | Community-Based Noncommunicable Disease Care for Syrian Refugees in Lebanon                                                                              | 2017 | Medical Teams International                                                                                                                                                                                                                    | Journal article | Global Health Science and Practice | Eastern Mediterranean | Lebanon     | Conflict                   | General population, camp | Non-communicable diseases | Monitoring of chronic disease markers and treatment adherence, health education                                                              | Refugee outreach volunteers  | Documentation of experience                                                                                   | <ul style="list-style-type: none"> <li>- Refugee outreach volunteers monitored patients with chronic diseases, provided referrals, and conducted health education in informal refugee settlements.</li> </ul>                                                                                                                                                                                                                                                                                                                                                                                                                                                                                         |

|         |                                                                                                                                 |      |                                                   |                 |                                       |                       |             |                  |                    |                     |                                                         |                                                  |                                                                                        |                                                                                                                                                                                                                                                                                                                                                                                                                                                                                                                                                                                                                                                                                                                                                                                                                            |
|---------|---------------------------------------------------------------------------------------------------------------------------------|------|---------------------------------------------------|-----------------|---------------------------------------|-----------------------|-------------|------------------|--------------------|---------------------|---------------------------------------------------------|--------------------------------------------------|----------------------------------------------------------------------------------------|----------------------------------------------------------------------------------------------------------------------------------------------------------------------------------------------------------------------------------------------------------------------------------------------------------------------------------------------------------------------------------------------------------------------------------------------------------------------------------------------------------------------------------------------------------------------------------------------------------------------------------------------------------------------------------------------------------------------------------------------------------------------------------------------------------------------------|
| Shah    | Approaches to support continued iCCM implementation during a flooding emergency in rural Bangladesh                             | 2019 | Save the Children, United Nations Children's Fund | Journal article | Journal of Global Health              | South-East Asia       | Bangladesh  | Natural disaster | General population | Child health        | Treatment of childhood pneumonia, diarrhea, and malaria | Community health care providers, village doctors | Qualitative interviews, focus group discussions, analysis of quantitative program data | <ul style="list-style-type: none"> <li>- CHWs continued providing services during the flooding emergency, although they had a decrease in the number of children treated.</li> <li>- CHWs traveled to reach households and set up temporary clinics.</li> <li>- Community clinics were flooded or were inaccessible, so CHWs visited households or set up temporary clinics in accessible areas.</li> <li>- Private village doctors, who acquire their own drug stocks, planned for the floods by buying extra drug stocks and identifying safe storage. Community health care providers, who are government workers and rely on the government supply chain, could not prepare as effectively.</li> <li>- Supervisors had difficulty reaching CHWs during the floods, so they communicated with CHWs by phone.</li> </ul> |
| Shriram | Community-centred approach for the control of Aedes spp. in a peri-urban zone in the Andaman and Nicobar Islands using temephos | 2009 | Indian Council of Medical Research                | Journal article | The National Medical Journal of India | South-East Asia       | India       | Disease outbreak | General population | Infectious diseases | Household container water treatment, health education   | Community volunteers                             | Pre-post entomological surveys                                                         | <ul style="list-style-type: none"> <li>- Community volunteers disseminated information to the residents on the Chikungunya outbreak.</li> <li>- Community volunteers were responsible for applying Temephos and calculating the surface area of breeding sources.</li> <li>- After the intervention, the Breteau and house indices dropped from 104.8% to 2.7% and 44.23% to 2.6%, respectively.</li> </ul>                                                                                                                                                                                                                                                                                                                                                                                                                |
| Shukla  | Impact of a Health Governance Intervention on Provincial Health System Performance in Afghanistan: A Quasi-Experimental Study   | 2018 | Management Sciences for Health                    | Journal article | Health Systems and Reform             | Eastern Mediterranean | Afghanistan | Conflict         | General population | Not specified       | Home visits (not specified)                             | Community health workers                         | Quasi-experimental study using routine data                                            | <ul style="list-style-type: none"> <li>- The health governance intervention had a negative impact on community health worker home visits.</li> </ul>                                                                                                                                                                                                                                                                                                                                                                                                                                                                                                                                                                                                                                                                       |

|              |                                                                                                                             |      |                                                                                                                     |                 |                             |          |             |                  |                    |                                |                                                                         |                                     |                                                                                                        |                                                                                                                                                                                                                                                                                                                                                                                                                                                                                                                                                                                                                                                                                                                                                                                                                                                                                                                                                                                                                                                                      |
|--------------|-----------------------------------------------------------------------------------------------------------------------------|------|---------------------------------------------------------------------------------------------------------------------|-----------------|-----------------------------|----------|-------------|------------------|--------------------|--------------------------------|-------------------------------------------------------------------------|-------------------------------------|--------------------------------------------------------------------------------------------------------|----------------------------------------------------------------------------------------------------------------------------------------------------------------------------------------------------------------------------------------------------------------------------------------------------------------------------------------------------------------------------------------------------------------------------------------------------------------------------------------------------------------------------------------------------------------------------------------------------------------------------------------------------------------------------------------------------------------------------------------------------------------------------------------------------------------------------------------------------------------------------------------------------------------------------------------------------------------------------------------------------------------------------------------------------------------------|
| Siekmans     | Community-based health care is an essential component of a resilient health system: evidence from Ebola outbreak in Liberia | 2017 | HealthBridge, Canadian Red Cross Society, Liberian Ministry of Health and Social Welfare, Liberia Red Cross Society | Journal article | BMC Public Health           | Africa   | Liberia     | Disease outbreak | General population | Child health                   | Treatment of childhood pneumonia and diarrhea                           | General community health volunteers | Survey of CHWs, qualitative interviews, focus group discussions, analysis of quantitative program data | <ul style="list-style-type: none"> <li>- During Ebola, most community members were reluctant or refused to go to HF for fear of infection.</li> <li>- CHWs continued their treatment of children during the outbreak, but there was a decrease in the number treated at the peak of the outbreak.</li> <li>- CHWs also carried out community education, contract tracing, and active case finding.</li> <li>- CHWs reported that utilization reduced because of community members' fear of contracting Ebola while seeking treatment. A smaller number of CHWs reported that the number of children treated increased because people were afraid to go to health facilities.</li> <li>- Some CHWs reported that they stopped treating children because of a directive from the government to stop treating.</li> <li>- Drug stockouts were another reason that CHWs stopped treating children.</li> <li>- CHWs felt confidence in continuing treatment services after the "no touch" ICCM training. However, most CHWs were trained late in the outbreak.</li> </ul> |
| Singh        | Evaluating the effectiveness of sexual and reproductive health services during humanitarian crises: A systematic review     | 2018 | London School of Hygiene and Tropical Medicine, World Health Organization                                           | Journal article | PLOS One                    | Various  | Various     | Various          | Various            | Sexual and reproductive health | Various                                                                 | Community health workers            | Literature review                                                                                      | <ul style="list-style-type: none"> <li>- The review found high-quality evidence for training of lower-level health care providers, the use of CHWs to promote SRH services, a three-tiered network of health workers providing SRH services.</li> <li>- The review found high-quality evidence for community-based SRH education and CHW delivery of injectable contraceptives.</li> </ul>                                                                                                                                                                                                                                                                                                                                                                                                                                                                                                                                                                                                                                                                           |
| Smith-Nonini | Primary Health Care and its Unfulfilled Promise of Community Participation: Lessons from a Salvadoran War Zone              | 1997 | University of North Carolina                                                                                        | Journal article | Human Organization          | Americas | El Salvador | Conflict         | General population | Not specified                  | Health education, community mobilization, treatment of common illnesses | Lay health promoters                | Documentation of experience                                                                            | <ul style="list-style-type: none"> <li>- CHWs provided basic healthcare services and health education in communities that did not access to professional health workers during the civil war.</li> </ul>                                                                                                                                                                                                                                                                                                                                                                                                                                                                                                                                                                                                                                                                                                                                                                                                                                                             |
| Smith-Nonini | "Popular" health and the state: Dialectics of the peace process in El Salvador                                              | 1997 | University of North Carolina                                                                                        | Journal article | Social Science and Medicine | Americas | El Salvador | Conflict         | General population | Primary healthcare             | Health education, curative and preventive services (not specified)      | Lay health promoters                | Documentation of experience                                                                            | <ul style="list-style-type: none"> <li>- During the war, community-based lay health promoters were the key health providers in rebel-held areas.</li> </ul>                                                                                                                                                                                                                                                                                                                                                                                                                                                                                                                                                                                                                                                                                                                                                                                                                                                                                                          |

|          |                                                                                                                                                                   |      |                                                                                                                           |                 |                                |                       |                                                     |                            |                    |                                               |                                                                                                   |                                                       |                                                                         |                                                                                                                                                                                                                                                                                                                                                                                                                                                                                                                                                                                                                                                                                                                                                                                                                                                                                                                                                            |
|----------|-------------------------------------------------------------------------------------------------------------------------------------------------------------------|------|---------------------------------------------------------------------------------------------------------------------------|-----------------|--------------------------------|-----------------------|-----------------------------------------------------|----------------------------|--------------------|-----------------------------------------------|---------------------------------------------------------------------------------------------------|-------------------------------------------------------|-------------------------------------------------------------------------|------------------------------------------------------------------------------------------------------------------------------------------------------------------------------------------------------------------------------------------------------------------------------------------------------------------------------------------------------------------------------------------------------------------------------------------------------------------------------------------------------------------------------------------------------------------------------------------------------------------------------------------------------------------------------------------------------------------------------------------------------------------------------------------------------------------------------------------------------------------------------------------------------------------------------------------------------------|
| Soe      | International non-governmental organizations' provision of community based tuberculosis care for hard-to-reach populations in Myanmar, 2013–2014                  | 2017 | Myanmar Department of Medical Research, Institute of Tropical Medicine, Chinese Center for Disease Control and Prevention | Journal article | Infectious Diseases of Poverty | South-East Asia       | Myanmar                                             | Conflict                   | General population | Infectious diseases                           | Health education, detection of suspected TB cases, DOTS for TB, counseling on treatment adherence | Community health volunteers                           | Analysis of quantitative program data, document review                  | <ul style="list-style-type: none"> <li>– Community health volunteers were recruited and managed by NGOs to provide community-based TB care.</li> <li>– The community-based TB control program in challenging contexts was seen as successful.</li> </ul>                                                                                                                                                                                                                                                                                                                                                                                                                                                                                                                                                                                                                                                                                                   |
| Speakman | Development of the Community Midwifery Education initiative and its influence on women's health and empowerment in Afghanistan: a case study                      | 2014 | London School of Hygiene and Tropical Medicine, Rumi Consultancy, Royal Tropical Institute, Kabul Medical University      | Journal article | BMC Women's Health             | Eastern Mediterranean | Afghanistan                                         | Conflict                   | General population | Maternal health                               | Antenatal care, assisted home delivery, postnatal care, newborn care, provision of contraceptives | Community midwives                                    | Qualitative interviews, document review                                 | <ul style="list-style-type: none"> <li>– Increase in the number of midwives has been reported as a key contributor to the decrease in maternal mortality in Afghanistan.</li> <li>– Midwives were seen as positive role models for women and girls.</li> <li>– Women were empowered by providing training and economic opportunity to midwives and by prioritizing women's health in communities.</li> <li>– Sustainability issues included security, corruption, quality-maintenance, and financing.</li> <li>– Security issues challenged deployment, demand, and data collection, which led to inequitable maternal healthcare provision, weakened data reliability, and potentially underestimated mortality.</li> <li>– It was suggested that community midwifery could be made safer and more attractive through enhanced salaries, a higher ratio of midwives to population in insecure areas, negotiated protection with local leaders.</li> </ul> |
| Steege   | Gender and Community Health Worker programmes in fragile and conflict-affected settings: Findings from Sierra Leone, the Democratic Republic of Congo and Liberia | 2018 | Liverpool School of Tropical Medicine                                                                                     | Report          | N/A                            | Africa                | Democratic Republic of Congo, Liberia, Sierra Leone | Conflict, disease outbreak | General population | Maternal health, newborn health, child health | Not specified                                                                                     | Community health workers, community health assistants | Document review, qualitative interviews, photography, community mapping | <ul style="list-style-type: none"> <li>– Even though women were prioritized for CHW recruitment, it was often to find women who had the minimum educational/literacy requirements.</li> <li>– Crises may increase gender inequity in CHW hiring practice because disruptions in education make it difficult for women to obtain minimum education requirements.</li> <li>– Women's household responsibilities may increase even more during times of conflict, when men may be more likely to be absent from the home.</li> <li>– Community-based selection of CHWs may favor men because of gender norms.</li> <li>– Male family members may prevent women from taking work as a CHW.</li> <li>– In insecure settings, women may face greater risk to travel long distances unescorted. Cultural norms may also restrict women's travel.</li> <li>– Women rarely become peer supervisors because of lower literacy and educational levels.</li> </ul>     |

|                |                                                                                                                                       |      |                                                                                                                                                                                             |                 |                         |                 |              |                  |                    |                                |                                                |                                                        |                                                                              |                                                                                                                                                                                                                                                                                                                                                                                                                                                                                                                                                                                                                                                                                                                                                                                                                                                                                             |
|----------------|---------------------------------------------------------------------------------------------------------------------------------------|------|---------------------------------------------------------------------------------------------------------------------------------------------------------------------------------------------|-----------------|-------------------------|-----------------|--------------|------------------|--------------------|--------------------------------|------------------------------------------------|--------------------------------------------------------|------------------------------------------------------------------------------|---------------------------------------------------------------------------------------------------------------------------------------------------------------------------------------------------------------------------------------------------------------------------------------------------------------------------------------------------------------------------------------------------------------------------------------------------------------------------------------------------------------------------------------------------------------------------------------------------------------------------------------------------------------------------------------------------------------------------------------------------------------------------------------------------------------------------------------------------------------------------------------------|
| Stehling-Ariza | The impact of active surveillance and health education on an Ebola virus disease cluster — Kono District, Sierra Leone, 2014–2015     | 2016 | Centers for Disease Control and Prevention, University of New South Wales, Sierra Leone Ministry of Health and Sanitation, International Federation of Red Cross and Red Crescent Societies | Journal article | BMC Infectious Diseases | Africa          | Sierra Leone | Disease outbreak | General population | Infectious diseases            | Community-based surveillance, health education | Community health workers                               | Qualitative interviews, analysis of quantitative program data, record review | <ul style="list-style-type: none"> <li>– CHWs carried out active disease surveillance and health education in their communities.</li> <li>– CHWs were part of a surveillance team that contributed to the reduced time from onset of disease to reporting of suspected cases.</li> </ul>                                                                                                                                                                                                                                                                                                                                                                                                                                                                                                                                                                                                    |
| Stone          | Community Event-Based Surveillance for Ebola Virus Disease in Sierra Leone: Implementation of a National-Level System During a Crisis | 2016 | International Rescue Committee, Save the Children, Sierra Leone Ministry of Health and Sanitation, CARE International, ABC Development                                                      | Journal article | PLOS Currents Outbreaks | Africa          | Sierra Leone | Disease outbreak | General population | Infectious diseases            | Community-based surveillance                   | Community health monitors                              | Qualitative interviews, analysis of surveillance data, knowledge test        | <ul style="list-style-type: none"> <li>– Community health monitors were in charge of detecting triggers and reporting them to the Community Surveillance Supervisor.</li> <li>– Community health monitors were active in the community through visits to households and speaking with key informants.</li> <li>– Because of logistical delays, it took six months for the system to be fully operational and it began reporting well after the peak in caseload.</li> <li>– Monthly reporting was high, with over 80% reporting in most months.</li> <li>– Most alerts were for deaths that did not meet the criteria of a trigger event.</li> <li>– Lack of communication, logistical constraints, and physical barriers all presented obstacles to the community health monitors.</li> <li>– Community ownership of the program was important because of the sensitive nature.</li> </ul> |
| Tanabe         | Piloting community-based medical care for survivors of sexual assault in conflict-affected Karen State of eastern Burma               | 2013 | Women's Refugee Commission, Global Health Access Program, Burma Medical Association, Karen Department of Health and Welfare                                                                 | Journal article | Conflict and Health     | South-East Asia | Myanmar      | Conflict         | General population | Sexual and reproductive health | Medical care for survivors of sexual assault   | Community health workers, traditional birth attendants | Focus group discussions                                                      | <ul style="list-style-type: none"> <li>– CHWs were trained to provide care to victims of sexual assault.</li> <li>– No cases of sexual assault were seen or heard of by any of the CHWs during the study period.</li> <li>– CHWs were comfortable with the topic of GBV.</li> <li>– CHWs provided training to TBAs to provide community information on sexual assault care.</li> <li>– CHWs and TBAs were amongst the groups that community members in Karen State reported to trust to seek medical care.</li> </ul>                                                                                                                                                                                                                                                                                                                                                                       |

|         |                                                                                                       |      |                                                                                                   |                 |                              |                                                                 |                                                       |                  |                          |                                   |                                                                                                                                                                       |                                 |                                                                                        |                                                                                                                                                                                                                                                                                                                                                                                     |
|---------|-------------------------------------------------------------------------------------------------------|------|---------------------------------------------------------------------------------------------------|-----------------|------------------------------|-----------------------------------------------------------------|-------------------------------------------------------|------------------|--------------------------|-----------------------------------|-----------------------------------------------------------------------------------------------------------------------------------------------------------------------|---------------------------------|----------------------------------------------------------------------------------------|-------------------------------------------------------------------------------------------------------------------------------------------------------------------------------------------------------------------------------------------------------------------------------------------------------------------------------------------------------------------------------------|
| Tanabe  | Family planning in refugee settings: findings and actions from a multi-country study                  | 2017 | Women's Refugee Commission, University of Michigan, United Nations High Commissioner for Refugees | Journal article | Conflict and Health          | Africa, Eastern Mediterranean, South-East Asia, Western Pacific | Bangladesh, Djibouti, Jordan, Kenya, Malaysia, Uganda | Conflict         | General population, camp | Reproductive health               | Provision of contraceptives, community education                                                                                                                      | Community health workers        | Household survey, facility assessment, qualitative interviews, focus group discussions | <ul style="list-style-type: none"> <li>- CHWs provided contraceptives to refugees.</li> <li>- CHW provision of Sayana Press was piloted in a refugee camp in Uganda.</li> <li>- CHWs also carried out community education and mobilization on family planning.</li> <li>- Refugees viewed CHWs as one of the most appropriate sources of information on family planning.</li> </ul> |
| Tanaka  | Refugee participation in health relief services during the post-emergency phase in Tanzania           | 2004 | University of Tokyo                                                                               | Journal article | Public Health                | Africa                                                          | Tanzania                                              | Conflict         | Camp                     | Child health, infectious diseases | Health education, home visits, immunization, nutrition assessment, distribution of contraceptives, treatment of diarrhea, DOTS for tuberculosis, disease surveillance | Health information team members | Household survey, qualitative interviews, focus group discussions                      | <ul style="list-style-type: none"> <li>- Refugees were trained to provide health education in a refugee camp.</li> <li>- A large majority (79%) of refugees said they learned about preventing illnesses from the CHWs.</li> </ul>                                                                                                                                                  |
| Tappero | Lessons Learned during Public Health Response to Cholera Epidemic in Haiti and the Dominican Republic | 2011 | U.S. Centers for Disease Control and Prevention                                                   | Journal article | Emerging Infectious Diseases | Americas                                                        | Haiti                                                 | Disease outbreak | General population       | Infectious diseases               | Community education                                                                                                                                                   | Community health workers        | Documentation of experience                                                            | <ul style="list-style-type: none"> <li>- CHWs were trained to carry out community education on cholera prevention.</li> </ul>                                                                                                                                                                                                                                                       |

|       |                                                                                                                                      |      |                                                                                                          |                 |                                            |                 |             |                  |                    |                 |                                                                                                                                           |                                                                           |                                                               |                                                                                                                                                                                                                                                                                                                                                                                                                                                                                                                                                                                                                                                                                                                                                                                                                                                                                                                                                                                                                                                                                                                                                                                                                                                                                                           |
|-------|--------------------------------------------------------------------------------------------------------------------------------------|------|----------------------------------------------------------------------------------------------------------|-----------------|--------------------------------------------|-----------------|-------------|------------------|--------------------|-----------------|-------------------------------------------------------------------------------------------------------------------------------------------|---------------------------------------------------------------------------|---------------------------------------------------------------|-----------------------------------------------------------------------------------------------------------------------------------------------------------------------------------------------------------------------------------------------------------------------------------------------------------------------------------------------------------------------------------------------------------------------------------------------------------------------------------------------------------------------------------------------------------------------------------------------------------------------------------------------------------------------------------------------------------------------------------------------------------------------------------------------------------------------------------------------------------------------------------------------------------------------------------------------------------------------------------------------------------------------------------------------------------------------------------------------------------------------------------------------------------------------------------------------------------------------------------------------------------------------------------------------------------|
| Teela | Community-based delivery of maternal care in conflict-affected areas of eastern Burma: Perspectives from lay maternal health workers | 2009 | Johns Hopkins Bloomberg School of Public Health, Global Health Access Program, Burma Medical Association | Journal article | Social Science and Medicine                | South-East Asia | Myanmar     | Conflict         | General population | Maternal health | Emergency obstetric care, blood transfusion, focused antenatal and postnatal care, family planning promotion, provision of contraceptives | Maternal health workers, lay health workers, traditional birth attendants | Qualitative interviews, focus group discussions, case studies | <ul style="list-style-type: none"> <li>- Non-resident MHWs provided essential maternal health interventions including emergency obstetric care.</li> <li>- MHWs provided five of the six components of basic emergency obstetric care, plus blood transfusion.</li> <li>- MHWs were able to provide, at the community level, services normally considered feasible only in facility-based settings.</li> <li>- MHWs trained and worked with less skilled lay health workers and traditional birth attendants, who were closer to the community than MHWs and provided less technical services.</li> <li>- Positive relationships between MHWs and other project providers (HWs and TBAs), village leaders and community members were critical for success of the project.</li> <li>- MHWs' demonstration of their clinical abilities was also critical to acceptability.</li> <li>- When access to some areas were blocked due to military presence, only the local workers (HWs and TBAs) were able to provide services in the communities.</li> <li>- MHWs suggested solutions to some logistical constraints, including the use of walkie-talkies for communication, donkeys for travel and transport of supplies, and headlamps for improved lighting needed during provision of services.</li> </ul> |
| Terry | Brigadistas and revolutionaries: Health and Social Justice in El Salvador                                                            | 2013 | N/A                                                                                                      | Book chapter    | Rutgers University Press                   | Americas        | El Salvador | Conflict         | General population | Not specified   | First aid, trauma care, assisting surgeries, general medical care, health education                                                       | Brigadistas de salud                                                      | Documentation of experience                                   | <ul style="list-style-type: none"> <li>- Communities working independent of the government established their own health systems, using mostly CHWs.</li> </ul>                                                                                                                                                                                                                                                                                                                                                                                                                                                                                                                                                                                                                                                                                                                                                                                                                                                                                                                                                                                                                                                                                                                                            |
| Thara | An assessment of post-tsunami psychosocial training programmes in Tamilnadu, India                                                   | 2008 | Schizophrenia Research Foundation                                                                        | Journal article | International Journal of Social Psychiatry | South-East Asia | India       | Natural disaster | General population | Mental health   | Psychosocial support                                                                                                                      | Community level workers                                                   | Qualitative interviews                                        | <ul style="list-style-type: none"> <li>- Community level workers were trained to provide psychosocial support to tsunami survivors.</li> <li>- Community level workers reported to have repetitive training programmes and redundancy in training.</li> <li>- Many community level workers did not implement their training knowledge because the trainings occurred many months after the tsunami when the services were no longer seen as necessary.</li> </ul>                                                                                                                                                                                                                                                                                                                                                                                                                                                                                                                                                                                                                                                                                                                                                                                                                                         |

|         |                                                                                                                                                                                                                             |               |                                                                                                       |                 |                              |                 |           |                  |                    |                     |                                                                                                                                                                                                                                                               |                      |                                                 |                                                                                                                                                                                                                                                                                                                                                                                                                                                                                                                                                                                                                                                                                                                                                                                                                                                                                                             |
|---------|-----------------------------------------------------------------------------------------------------------------------------------------------------------------------------------------------------------------------------|---------------|-------------------------------------------------------------------------------------------------------|-----------------|------------------------------|-----------------|-----------|------------------|--------------------|---------------------|---------------------------------------------------------------------------------------------------------------------------------------------------------------------------------------------------------------------------------------------------------------|----------------------|-------------------------------------------------|-------------------------------------------------------------------------------------------------------------------------------------------------------------------------------------------------------------------------------------------------------------------------------------------------------------------------------------------------------------------------------------------------------------------------------------------------------------------------------------------------------------------------------------------------------------------------------------------------------------------------------------------------------------------------------------------------------------------------------------------------------------------------------------------------------------------------------------------------------------------------------------------------------------|
| Thormar | The impact of disaster work on community volunteers: The role of peri-traumatic distress, level of personal affectedness, sleep quality and resource loss, on post-traumatic stress disorder symptoms and subjective health | 2014          | University of Amsterdam, Arq Psychotrauma Expert Group, University of Innsbruck, Reykjavik University | Journal article | Journal of Anxiety Disorders | South-East Asia | Indonesia | Natural disaster | General population | Disaster response   | Remove the deceased, rescue the trapped and/or injured, re-establish water and sanitation, distribute food and non-food items, work in a public kitchen or aid warehouse, handle logistics, first aid, psychosocial support, locate missing community members | Red Cross volunteers | Survey of volunteers                            | <ul style="list-style-type: none"> <li>- Red Cross volunteers who responded to an earthquake experienced trauma from the earthquake, as well as additional trauma as volunteers. As a result they experienced high levels of post-traumatic stress disorder.</li> </ul>                                                                                                                                                                                                                                                                                                                                                                                                                                                                                                                                                                                                                                     |
| Thormar | Organizational factors and mental health in community volunteers. The role of exposure, preparation, training, tasks assigned, and support                                                                                  | 2013          | University of Amsterdam, Centrum'45, University of Innsbruck, Reykjavik University                    | Journal article | Anxiety, Stress and Coping   | South-East Asia | Indonesia | Natural disaster | General population | Disaster response   | Remove the deceased, rescue the trapped and/or injured, re-establish water and sanitation, distribute food and non-food items, work in a public kitchen or aid warehouse, handle logistics, first aid, psychosocial support, locate missing community members | Red Cross volunteers | Survey of volunteers                            | <ul style="list-style-type: none"> <li>- Loss of resources was the strongest contributor to symptoms of mental health complaints.</li> <li>- The task of evacuating bodies was not related to symptoms, but the tasks of providing PSS, handling administration, or handing out food aid were strongly related to symptoms.</li> <li>- Community volunteers that had a high need for support and the lack of support from team leaders and the organization strongly contributed to depression.</li> <li>- In order to assist volunteers in maintaining optimal mental health, organizations should minimize exposure by managing working hours, fluctuating tasks between those that provide low and high reward, supplementing lost resources (e.g., sleeping facilities), providing proper equipment that takes into account the volunteers safety, and strengthening organizational support.</li> </ul> |
| Thormar | Evaluation of the Ebola response - Uganda                                                                                                                                                                                   | Not specified | International Federation of the Red Cross and Red Crescent Societies, Ugandan Red Cross               | Report          | N/A                          | Africa          | Uganda    | Disease outbreak | General population | Infectious diseases | Disease surveillance, contact tracing, follow-up of Ebola survivors, community sensitization to reduce stigma against survivors, community education                                                                                                          | Red Cross Volunteers | Qualitative interviews, focus group discussions | <ul style="list-style-type: none"> <li>- During an Ebola outbreak, Red Cross volunteers carried out disease surveillance, contact tracing, follow-up of recovered Ebola survivors, community sensitization to reduce stigma against survivors, and community education.</li> <li>- Stakeholders reported that the volunteers' status as community members allowed them to play a key role in passing key messages to community members.</li> </ul>                                                                                                                                                                                                                                                                                                                                                                                                                                                          |



|          |                                                                                                                   |      |                                                                                                                                                                               |                 |                                                   |                       |             |                            |                    |                        |                                                                 |                                      |                                                 |                                                                                                                                                                                                                       |
|----------|-------------------------------------------------------------------------------------------------------------------|------|-------------------------------------------------------------------------------------------------------------------------------------------------------------------------------|-----------------|---------------------------------------------------|-----------------------|-------------|----------------------------|--------------------|------------------------|-----------------------------------------------------------------|--------------------------------------|-------------------------------------------------|-----------------------------------------------------------------------------------------------------------------------------------------------------------------------------------------------------------------------|
| Tiffany  | Community-Based Surveillance to Monitor Mortality in a Malaria-Endemic and Ebola-Epidemic Setting in Rural Guinea | 2016 | Médecins sans Frontières, Guéckédou Direction Préfectorale de la Santé, Guinea National Malaria Control Program, University of Basel, Lausanne University Hospital, Epicentre | Journal article | American Society of Tropical Medicine and Hygiene | Africa                | Guinea      | Disease outbreak           | General population | Mortality surveillance | Community-based mortality surveillance, malaria case management | Community volunteers                 | Analysis of surveillance data                   | - Community volunteers were trained to carry out community-based mortality surveillance.                                                                                                                              |
| Tuhkanen | A disaster preparedness and response project in Afghanistan: participants' perceptions                            | 2008 | Helsinki Polytechnic Stadia, HAMK University of Applied Sciences, University of Ulster                                                                                        | Journal article | Journal of Advanced Nursing                       | Eastern Mediterranean | Afghanistan | Conflict, natural disaster | General population | Disaster preparedness  | Not specified                                                   | Community-based first aid volunteers | Qualitative interviews, focus group discussions | - Respondents said that community volunteers needed to be integrated into disaster preparedness and response activities. Volunteers could support emergency mobile units with their community knowledge and contacts. |

|                                |                                                               |      |                                |        |     |                               |                          |                                                 |                    |                          |                                                             |                                                    |                             |                                                                                                                                                                                                                                                                                                                                                                                                                                                                                                                                                                                                                                                                                                                                                                                                                                                                                                                                                                                                                                                                                                                                                                                                                                                                                                                                                                                                                                                                                                                                                                                                                                                                                                                                                                                                                                                                                                                                                                                                                                                                                                                                                                                                                                                                                                                                                     |
|--------------------------------|---------------------------------------------------------------|------|--------------------------------|--------|-----|-------------------------------|--------------------------|-------------------------------------------------|--------------------|--------------------------|-------------------------------------------------------------|----------------------------------------------------|-----------------------------|-----------------------------------------------------------------------------------------------------------------------------------------------------------------------------------------------------------------------------------------------------------------------------------------------------------------------------------------------------------------------------------------------------------------------------------------------------------------------------------------------------------------------------------------------------------------------------------------------------------------------------------------------------------------------------------------------------------------------------------------------------------------------------------------------------------------------------------------------------------------------------------------------------------------------------------------------------------------------------------------------------------------------------------------------------------------------------------------------------------------------------------------------------------------------------------------------------------------------------------------------------------------------------------------------------------------------------------------------------------------------------------------------------------------------------------------------------------------------------------------------------------------------------------------------------------------------------------------------------------------------------------------------------------------------------------------------------------------------------------------------------------------------------------------------------------------------------------------------------------------------------------------------------------------------------------------------------------------------------------------------------------------------------------------------------------------------------------------------------------------------------------------------------------------------------------------------------------------------------------------------------------------------------------------------------------------------------------------------------|
| United Nations Children's Fund | Flexible Humanitarian – Development Programming: Case Studies | 2014 | United Nations Children's Fund | Report | N/A | Africa, Eastern Mediterranean | Ethiopia, Mali, Pakistan | Conflict, nutrition emergency, natural disaster | General population | Nutrition, not specified | Treatment of childhood malnutrition, malnutrition screening | Health Extension Workers, community health workers | Documentation of experience | <p>Ethiopia:</p> <ul style="list-style-type: none"> <li>– Frequent nutrition emergencies were treated as short-term emergencies. Therefore, the response was initiated each time an emergency occurred and was dependent on humanitarian funding and the response was short-term. This caused shortages in funding and delays in emergency response.</li> <li>– The government decided to include management of SAM in its development programming.</li> <li>– CMAM was also initiated to allow HEWs to treat malnutrition in the community, which led to the greatest improvements in access to treatment.</li> <li>– These changes led to much higher numbers of malnutrition treatments, high cure rates, improved and faster emergency response, and consistent funding and emergency preparedness.</li> <li>– Costs associated with phasing in and phasing out of emergency programs were also eliminated.</li> <li>– Integration of malnutrition management into the health system also allowed for longitudinal data on malnutrition cases for the majority of the country, compared to the limited data provided formerly by period nutrition surveys in limited areas.</li> </ul> <p>Mali:</p> <ul style="list-style-type: none"> <li>– Lack of emergency preparedness and capacity for emergency response led to a slow response to the conflict and nutrition emergency in 2012.</li> <li>– CHWs shifted their focus to nutrition during a nutrition emergency.</li> <li>– Scale-up of nutrition interventions by CHWs during an emergency period led to these interventions being included in the regular development programming post-emergency.</li> <li>– Maintaining a long-term focus during the emergency and flexible funding allowed for longer-term planning so that interventions could span humanitarian and development contexts. For example, humanitarian resources were invested in health system strengthening activities, which facilitated the transition back to development programming.</li> </ul> <p>Pakistan</p> <ul style="list-style-type: none"> <li>– The Lady Health Workers were critical to the flood response, as they were re-tasked from their more development-oriented work to focus on life-saving activities (e.g. malnutrition screening and delivery of a basic life-saving package).</li> </ul> |
|--------------------------------|---------------------------------------------------------------|------|--------------------------------|--------|-----|-------------------------------|--------------------------|-------------------------------------------------|--------------------|--------------------------|-------------------------------------------------------------|----------------------------------------------------|-----------------------------|-----------------------------------------------------------------------------------------------------------------------------------------------------------------------------------------------------------------------------------------------------------------------------------------------------------------------------------------------------------------------------------------------------------------------------------------------------------------------------------------------------------------------------------------------------------------------------------------------------------------------------------------------------------------------------------------------------------------------------------------------------------------------------------------------------------------------------------------------------------------------------------------------------------------------------------------------------------------------------------------------------------------------------------------------------------------------------------------------------------------------------------------------------------------------------------------------------------------------------------------------------------------------------------------------------------------------------------------------------------------------------------------------------------------------------------------------------------------------------------------------------------------------------------------------------------------------------------------------------------------------------------------------------------------------------------------------------------------------------------------------------------------------------------------------------------------------------------------------------------------------------------------------------------------------------------------------------------------------------------------------------------------------------------------------------------------------------------------------------------------------------------------------------------------------------------------------------------------------------------------------------------------------------------------------------------------------------------------------------|

|                                |                                                                                                   |      |                                                                                                                                                                                       |                 |                                                                |                       |              |                  |                          |                                                          |                                                                                                                    |                          |                                           |                                                                                                                                                                                                                                                                                                                                                                                                                                                                                                                                                                                                                                                                                                                                                                                                                                                                                                                          |
|--------------------------------|---------------------------------------------------------------------------------------------------|------|---------------------------------------------------------------------------------------------------------------------------------------------------------------------------------------|-----------------|----------------------------------------------------------------|-----------------------|--------------|------------------|--------------------------|----------------------------------------------------------|--------------------------------------------------------------------------------------------------------------------|--------------------------|-------------------------------------------|--------------------------------------------------------------------------------------------------------------------------------------------------------------------------------------------------------------------------------------------------------------------------------------------------------------------------------------------------------------------------------------------------------------------------------------------------------------------------------------------------------------------------------------------------------------------------------------------------------------------------------------------------------------------------------------------------------------------------------------------------------------------------------------------------------------------------------------------------------------------------------------------------------------------------|
| United Nations Children's Fund | Children in Pakistan: Every Child's Right - Responding to the Floods in Pakistan                  | 2010 | United Nations Children's Fund                                                                                                                                                        | Report          | N/A                                                            | Eastern Mediterranean | Pakistan     | Natural disaster | General population, camp | Maternal health, newborn health, child health, nutrition | Treatment of childhood illnesses, immunization, de-worming, health education, promotion of exclusive breastfeeding | Lady health workers      | Documentation of experience               | <ul style="list-style-type: none"> <li>- Lady Health Workers were supported to continue their usual MNCH services in affected areas.</li> <li>- They were also critical in carrying out mass immunization, de-worming, and health education campaigns.</li> </ul>                                                                                                                                                                                                                                                                                                                                                                                                                                                                                                                                                                                                                                                        |
| van der Hoek                   | Early diagnosis and treatment of malaria in a refugee population in Sri Lanka                     | 1997 | University of Leiden, Anti-Malaria Campaign, University of Sri Jayawardenepura                                                                                                        | Journal article | Southeast Asian Journal of Tropical Medicine and Public Health | South-East Asia       | Sri Lanka    | Conflict         | Camp                     | Child health                                             | Treatment of malaria, health education                                                                             | Health volunteers        | Household survey, qualitative interviews  | <ul style="list-style-type: none"> <li>- Pre-existing health volunteers were quickly trained on malaria case management in IDP camps.</li> <li>- Only 45% of community respondents were aware of the presence of the health volunteers.</li> </ul>                                                                                                                                                                                                                                                                                                                                                                                                                                                                                                                                                                                                                                                                       |
| Vandi                          | Ebola and community health worker services in Kenema District, Sierra Leone: please mind the gap! | 2017 | Sierra Leone Ministry of Health and Sanitation, Institute of Tropical Medicine, University of Toronto, Dignitas International, International Rescue Committee, St. Michael's Hospital | Journal article | Public Health Action                                           | Africa                | Sierra Leone | Disease outbreak | General population       | Child health                                             | Treatment of childhood pneumonia, diarrhea, and malaria                                                            | Community health workers | Analysis of quantitative program data     | <ul style="list-style-type: none"> <li>- The % of CHWs reporting any activity increased from 59% before the outbreak to 95% during the outbreak, and was sustained at 98% after the outbreak. The increased reporting rate was likely due to improved supervision during the outbreak.</li> <li>- The number of children treated for malaria increased during the outbreak. This was the case in chiefdoms with and without Ebola cases. This was likely due to the shift from RDTs to presumptive treatment of fever with antimalarials.</li> <li>- The number of children treated for pneumonia and diarrhea decreased during the outbreak. The decrease in pneumonia treatments was seen in chiefdoms with and without EVD cases. In contrast, only chiefdoms with EVD cases experienced a decrease in diarrhea treatments. After the outbreak, the numbers rebounded to or above the pre-outbreak levels.</li> </ul> |
| Vijayakumar                    | CASP – An intervention by community volunteers to reduce suicidal behaviour among refugees        | 2017 | Sneha, Voluntary Health Services, Samarth, Christian Medical College, Adventist Development Relief Agency                                                                             | Journal article | International Journal of Social Psychiatry                     | South-East Asia       | India        | Conflict         | Camp                     | Mental health                                            | Psychosocial support                                                                                               | Community volunteers     | Household survey, focus group discussions | <ul style="list-style-type: none"> <li>- An intervention using community volunteers to provide psychosocial support reduced suicidal behaviour among refugees.</li> </ul>                                                                                                                                                                                                                                                                                                                                                                                                                                                                                                                                                                                                                                                                                                                                                |

|             |                                                                                                                                     |      |                                                                                                                                                       |                 |                                              |                       |             |          |                    |                     |                                                                                                                                                                                                                                                                                                                                          |                                  |                             |                                                                                                                                                                                                                                                                                                                                                                                                                                                                                                                                                                                                                                                                                                                                                                                                                                                                          |
|-------------|-------------------------------------------------------------------------------------------------------------------------------------|------|-------------------------------------------------------------------------------------------------------------------------------------------------------|-----------------|----------------------------------------------|-----------------------|-------------|----------|--------------------|---------------------|------------------------------------------------------------------------------------------------------------------------------------------------------------------------------------------------------------------------------------------------------------------------------------------------------------------------------------------|----------------------------------|-----------------------------|--------------------------------------------------------------------------------------------------------------------------------------------------------------------------------------------------------------------------------------------------------------------------------------------------------------------------------------------------------------------------------------------------------------------------------------------------------------------------------------------------------------------------------------------------------------------------------------------------------------------------------------------------------------------------------------------------------------------------------------------------------------------------------------------------------------------------------------------------------------------------|
| Viswanathan | Can community health workers increase coverage of reproductive health services?                                                     | 2011 | Johns Hopkins University, The GAVI Alliance, Afghanistan Ministry of Public Health                                                                    | Journal article | Journal of Epidemiology and Community Health | Eastern Mediterranean | Afghanistan | Conflict | General population | Reproductive health | Home visits; provision of micronutrient supplementation and anti-malarials to pregnant women; distribution of contraceptives; diagnosis and treatment of malaria, diarrhea and acute respiratory infection; health education; support for immunization; promotion of facility delivery; assisting in preparing for an emergency referral | Community health workers         | Household survey            | - The presence of a female CHW in the community was associated with higher use of modern contraception, antenatal care services and skilled birth attendants, but presence of a male CHW was not.                                                                                                                                                                                                                                                                                                                                                                                                                                                                                                                                                                                                                                                                        |
| von Roenne  | Reproductive health services for refugees by refugees: an example from Guinea                                                       | 2010 | Gesellschaft für Technische Zusammenarbeit, Reproductive Health Group, London School of Hygiene and Tropical Medicine, Institute of Tropical Medicine | Journal article | Disasters                                    | Africa                | Guinea      | Conflict | Camp               | Reproductive health | Health promotion, provision of contraceptives                                                                                                                                                                                                                                                                                            | Reproductive health facilitators | Documentation of experience | - Community-based reproductive health facilitators provided information and advice on reproductive health, distributed contraceptives, encouraged pregnant women to attend ANC, couples to use family planning, or those experiencing sexually transmitted infection symptoms to seek treatment.                                                                                                                                                                                                                                                                                                                                                                                                                                                                                                                                                                         |
| Weiss       | Community-based mental health treatments for survivors of torture and militant attacks in Southern Iraq: a randomized control trial | 2015 | Johns Hopkins Bloomberg School of Public Health, Heartland Alliance International, University of Washington                                           | Journal article | BMC Psychiatry                               | Eastern Mediterranean | Iraq        | Conflict | General population | Mental health       | Treatment of mental health disorders                                                                                                                                                                                                                                                                                                     | Community mental health workers  | Randomized controlled trial | - CMHWs in one arm provided a transdiagnostic treatment for multiple mental health disorders, the Common Elements Treatment Approach (CETA). In the other arm, they provided an established, evidence-based cognitive behavior therapy approach, cognitive processing therapy (CPT).<br>- The CETA intervention showed large effect sizes for all outcomes. The CPT intervention showed moderate effects sizes for trauma and depression, with small to no effect for anxiety or dysfunction, respectively.<br>- Non-specialized health workers were able to treat comorbid symptoms of trauma, depression and anxiety, and dysfunction among survivors of systematic violence who have limited access to mental health professionals.<br>- Security issues and connectivity issues presented obstacles in community mental health workers contacting their supervisors. |

|          |                                                                                                                                                                                                  |      |                                                                                                                               |                 |                                                          |          |             |                  |                    |                           |                                                                               |                              |                                                      |                                                                                                                                                                                                                                                                                                                                                       |
|----------|--------------------------------------------------------------------------------------------------------------------------------------------------------------------------------------------------|------|-------------------------------------------------------------------------------------------------------------------------------|-----------------|----------------------------------------------------------|----------|-------------|------------------|--------------------|---------------------------|-------------------------------------------------------------------------------|------------------------------|------------------------------------------------------|-------------------------------------------------------------------------------------------------------------------------------------------------------------------------------------------------------------------------------------------------------------------------------------------------------------------------------------------------------|
| Williams | Perceptions of Health Communication, Water Treatment and Sanitation in Artibonite Department, Haiti, March-April 2012                                                                            | 2015 | Centers for Disease Control and Prevention                                                                                    | Journal article | PLOS One                                                 | Americas | Haiti       | Disease outbreak | General population | Infectious diseases, WASH | Health education, distribution of water treatment products                    | Community health workers     | Focus group discussions                              | - CHWs were trusted by the community to provide reliable health messages, verify the quality of water, and provide water treatment products.                                                                                                                                                                                                          |
| Wilner   | Sustained use in a relief-to-recovery household water chlorination program in Haiti: comparing external evaluation findings with internal supervisor and community health worker monitoring data | 2017 | Tufts University School of Medicine, Centers for Disease Control and Prevention, Tufts University, Deep Springs International | Journal article | Journal of Water, Sanitation and Hygiene for Development | Americas | Haiti       | Natural disaster | General population | WASH                      | Provision of water treatment, monitoring of water treatment, health education | Community health workers     | Analysis of quantitative program and evaluation data | - CHWs performed household visits to distribute safe storage containers and chlorine products and to monitor household water treatment status and provide health education.<br>- The program achieved high and sustained water treatment coverage.                                                                                                    |
| Wilunda  | Barriers to Institutional Childbirth in Rumbek North County, South Sudan: A Qualitative Study                                                                                                    | 2016 | Kyoto University, Doctors with Africa CUAMM, Tenri Health Care University, World Health Organization                          | Journal article | PLOS One                                                 | Africa   | South Sudan | Conflict         | General population | Maternal health           | Assisted home delivery                                                        | Traditional birth attendants | Qualitative interviews, focus group discussions      | - Reasons that women preferred to deliver at home with a TBA instead of in a health facility included: long distance to the health facility and cost of travel, preference for TBAs who follow traditional cultural practices, negative perceptions of delivery practices at health facilities (such as childbirth position and vaginal examination). |

|         |                                                                                     |      |                                                                                                      |                 |          |        |             |          |                    |                 |                                                                                                     |                              |                                                 |                                                                                                                                                                                                                                                                                                                                                                                                                                                                                                                                                                                                                                                                                                                                                                                                                                                                                                                                                                                                                                                                                                                                                                                                                                                                                                                                                                                                                                                                                                                                                                                                                                                                                                                      |
|---------|-------------------------------------------------------------------------------------|------|------------------------------------------------------------------------------------------------------|-----------------|----------|--------|-------------|----------|--------------------|-----------------|-----------------------------------------------------------------------------------------------------|------------------------------|-------------------------------------------------|----------------------------------------------------------------------------------------------------------------------------------------------------------------------------------------------------------------------------------------------------------------------------------------------------------------------------------------------------------------------------------------------------------------------------------------------------------------------------------------------------------------------------------------------------------------------------------------------------------------------------------------------------------------------------------------------------------------------------------------------------------------------------------------------------------------------------------------------------------------------------------------------------------------------------------------------------------------------------------------------------------------------------------------------------------------------------------------------------------------------------------------------------------------------------------------------------------------------------------------------------------------------------------------------------------------------------------------------------------------------------------------------------------------------------------------------------------------------------------------------------------------------------------------------------------------------------------------------------------------------------------------------------------------------------------------------------------------------|
| Wilunda | Changing the role of traditional birth attendants in Yiroi West County, South Sudan | 2017 | Kyoto University, Doctors with Africa CUAMM, Tenri Health Care University, World Health Organization | Journal article | PLOS One | Africa | South Sudan | Conflict | General population | Maternal health | Referral of women to health facilities for childbirth, prenatal visits, postnatal visits, first aid | Traditional birth attendants | Qualitative interviews, focus group discussions | <ul style="list-style-type: none"> <li>- When national guidelines were changed to instruct TBAs to refer all women to deliver in health facilities, community- based TBAs' main task became referring women to health facilities for childbirth.</li> <li>- TBAs were mostly complying and referring women to facilities. However, some TBAs were still attending deliveries in the community and making referrals only when there was a complication.</li> <li>- The new role of TBAs was mostly accepted by women in the community because of a gradual realization that institutional childbirth was safer than home childbirth.</li> <li>- TBA's motivation and commitment were key to integrating them into the health system, despite poor monetary compensation.</li> <li>- As TBAs were mostly illiterate, they relied on facility-based CHWs to help them complete monthly reports.</li> <li>- Insecurity made it difficult for TBAs to escort women to health facilities, especially at night because they feared inter-tribal fighting, rape, and abduction.</li> <li>- Lack of mobile phones and money to make calls and lack of basic items like flashlights, bags, raincoats and boots made it more difficult to arrange for referrals to health facilities.</li> <li>- Some TBAs without any intention of assisting women to deliver at home found themselves doing so because of various barriers including those faced by women in accessing health care.</li> <li>- Long distances to health facilities and lack of transportation was a major obstacle for childbirth at health facilities.</li> <li>- TBAs were not receiving enough monetary compensation to meet their basic needs.</li> </ul> |
|---------|-------------------------------------------------------------------------------------|------|------------------------------------------------------------------------------------------------------|-----------------|----------|--------|-------------|----------|--------------------|-----------------|-----------------------------------------------------------------------------------------------------|------------------------------|-------------------------------------------------|----------------------------------------------------------------------------------------------------------------------------------------------------------------------------------------------------------------------------------------------------------------------------------------------------------------------------------------------------------------------------------------------------------------------------------------------------------------------------------------------------------------------------------------------------------------------------------------------------------------------------------------------------------------------------------------------------------------------------------------------------------------------------------------------------------------------------------------------------------------------------------------------------------------------------------------------------------------------------------------------------------------------------------------------------------------------------------------------------------------------------------------------------------------------------------------------------------------------------------------------------------------------------------------------------------------------------------------------------------------------------------------------------------------------------------------------------------------------------------------------------------------------------------------------------------------------------------------------------------------------------------------------------------------------------------------------------------------------|

|          |                                                                                                                                |      |                                                                                                                                                                                                                                          |                 |                                      |                         |                                          |          |                    |                                   |                                                                    |                                                        |                                                                                                                            |                                                                                                                                                                                                                                                                                                                                                                                                                                                                                                                                                                                                                                              |
|----------|--------------------------------------------------------------------------------------------------------------------------------|------|------------------------------------------------------------------------------------------------------------------------------------------------------------------------------------------------------------------------------------------|-----------------|--------------------------------------|-------------------------|------------------------------------------|----------|--------------------|-----------------------------------|--------------------------------------------------------------------|--------------------------------------------------------|----------------------------------------------------------------------------------------------------------------------------|----------------------------------------------------------------------------------------------------------------------------------------------------------------------------------------------------------------------------------------------------------------------------------------------------------------------------------------------------------------------------------------------------------------------------------------------------------------------------------------------------------------------------------------------------------------------------------------------------------------------------------------------|
| Wisborg  | Life or death. The social impact of paramedics and first responders in landmine-infested villages in northern Iraq             | 2008 | Hammerfest Hospital, Trauma Care Foundation Iraq, Tromsø Mine Victim Resource Center, Bodø University College                                                                                                                            | Journal article | Rural and Remote Health              | Eastern Mediterranean   | Iraq                                     | Conflict | General population | Trauma                            | Trauma care                                                        | Village first responders                               | Qualitative interviews, focus group discussions                                                                            | <ul style="list-style-type: none"> <li>- A system of village paramedics and lay first responders for landmine injuries was highly appreciated by the communities.</li> <li>- Community members wanted the paramedics and first responders to address issues beyond landmine injuries, and expanding the program's scope was important for gaining the trust of the communities.</li> <li>- The program increased the feeling among community members that they were important to the external society.</li> <li>- Community services were seen as reducing the likelihood that community members would migrate from the villages.</li> </ul> |
| Witter   | The gendered health workforce: mixed methods analysis from four fragile and post-conflict contexts                             | 2017 | ReBUILD Consortium, Queen Margaret University, Makerere School of Public Health, University of Sierra Leone, Biomedical Research and Training Institute, Cambodian Development Resource Institute, Liverpool School of Tropical Medicine | Journal article | Health Policy and Planning           | Africa, Western Pacific | Cambodia, Sierra Leone, Uganda, Zimbabwe | Conflict | General population | Not specified                     | Not specified                                                      | Community health workers, traditional birth attendants | Stakeholder mapping, document review, qualitative interviews, life histories, analysis staffing data, health worker survey | During the Ebola outbreak in 2014–15, women predominated amongst the lowest cadres of health workers who were been critical to the Ebola response—including volunteers, traditional birth attendants, community-based motivators and community health workers. Thus, gender norms shaped vulnerability to Ebola.                                                                                                                                                                                                                                                                                                                             |
| Woodward | Reproductive health for refugees by refugees in Guinea IV: Peer education and HIV knowledge, attitudes, and reported practices | 2011 | London School of Hygiene & Tropical Medicine, Reproductive Health Group, Gesellschaft für Internationale Zusammenarbeit, Institute of Tropical Medicine, Institute of Tropical Medicine and International Health                         | Journal article | Conflict and Health                  | Africa                  | Guinea                                   | Conflict | Camp               | Maternal health                   | Provision of contraceptives, health education                      | Lay health workers                                     | Survey of men and women                                                                                                    | - Refugee lay health workers provided contraceptives and health education in refugee camps                                                                                                                                                                                                                                                                                                                                                                                                                                                                                                                                                   |
| Yusufzai | Health workers murdered as Pakistan vaccinates 8.4 million children                                                            | 2014 | Not specified                                                                                                                                                                                                                            | Commentary      | Canadian Medical Association Journal | Eastern Mediterranean   | Pakistan                                 | Conflict | General population | Child health, infectious diseases | Polio immunization, health education, distribution of hygiene kits | Vaccination workers                                    | Documentation of experience                                                                                                | <ul style="list-style-type: none"> <li>- Community members participated in large-scale polio immunization campaigns, as well as health education and distribution of hygiene kits.</li> <li>- Vaccination workers have been targeted by militants, with many having been killed.</li> <li>- Security was improved by having police guard the vaccination teams.</li> </ul>                                                                                                                                                                                                                                                                   |

### Appendix S3: Results of peer-reviewed article database search, grey literature search, and reference screening

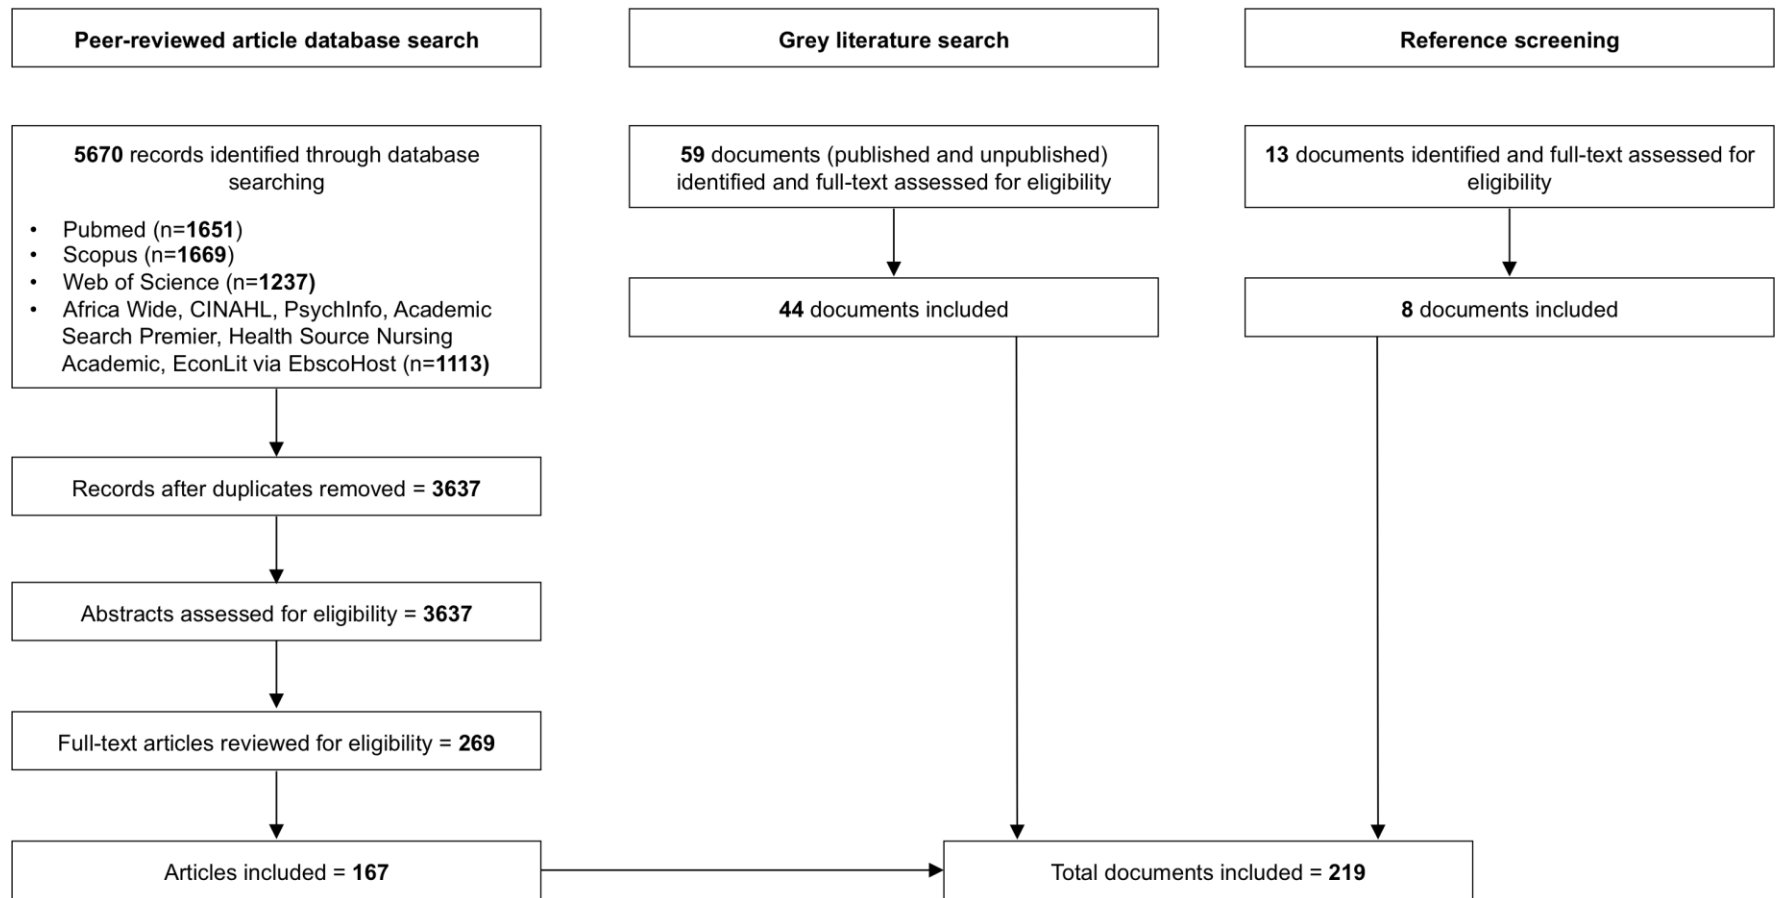

Supplement: jogh-10-020602-s001.pdf [file jogh-10-020602-s001.pdf]
